# Supplementary material for: Metal-free synthesis of activated ynesulfonamides and tertiary enesulfonamides
Source: Royal Society of Chemistry journal article supplement (doi:10.1039/c9ob00947g), 2019-01-01
Supplement: c9ob00947g1.pdf [file c9ob00947g1.pdf]

*Supporting Information*

# Metal-Free Synthesis of Activated Ynesulfonamides and Tertiary Enesulfonamides

Lucile ANDNA, Laurence MIESCH\*

*Equipe de Synthèse Organique et Phytochimie, Institut de Chimie,  
Université de Strasbourg, CNRS-UdS UMR 7177,  
4, rue Blaise Pascal CS 90032, 67081 Strasbourg, France*

Corresponding author: [lmiesch@unistra.fr](mailto:lmiesch@unistra.fr)

## **Contents**

|                                                                                            |    |
|--------------------------------------------------------------------------------------------|----|
| General remarks.....                                                                       | 2  |
| Experimental procedure and characterization data for terminal alkynes SI-a.....            | 3  |
| Experimental procedure and characterization data for bromoalkynes SI-b .....               | 8  |
| Experimental procedure and characterization data for sulfonamides 1 and SI-c.....          | 11 |
| Characterization data for Michael double addition product 3.....                           | 15 |
| Experimental procedure and characterization data for ynesulfonamides 2, 4 - 14 .....       | 16 |
| Experimental procedure and characterization data for enesulfonamides 15/15' - 29/29' ..... | 22 |
| Experimental procedure for isomerization.....                                              | 33 |
| <sup>1</sup> H and <sup>13</sup> C spectra for SI-a11 .....                                | 34 |
| <sup>1</sup> H and <sup>13</sup> C spectra for SI-b .....                                  | 35 |
| <sup>1</sup> H and <sup>13</sup> C spectra for 3.....                                      | 37 |
| <sup>1</sup> H and <sup>13</sup> C spectra for ynesulfonamides 4 - 14 .....                | 38 |
| <sup>1</sup> H and <sup>13</sup> C spectra for enesulfonamides 15/15' – 29/29' .....       | 47 |

## General remarks

All reactions were carried under argon atmosphere. DMF, acetone, THF, toluene, MeCN and acetic acid were used as received from Sigma Aldrich. CH<sub>2</sub>Cl<sub>2</sub> was dried using a dry solvent station GT S100 system.

NMR Spectra (<sup>1</sup>H, <sup>13</sup>C) were performed at 298 K. <sup>1</sup>H (500 MHz or 300 MHz) and <sup>13</sup>C (125 MHz) NMR chemical shifts are reported relative to internal TMS ( $\delta = 0.00$  ppm) or to residual protiated solvent. Data are presented as follows: chemical shift (ppm), multiplicity (s = singlet, d = doublet, t = triplet, q = quartet, sept = septet, m = multiplet, br = broad), coupling constant *J* (Hz) and integration.

HRMS data were recorded on a microTOF spectrometer equipped with an orthogonal electrospray (ESI) interface.

Thin layer chromatography was performed using Merck TLC silica gel 60 F<sub>254</sub> aluminium sheets using petroleum ether/EtOAc or CH<sub>2</sub>Cl<sub>2</sub>/acetone as eluant and visualized using permanganate stain, ninhydrin stain, vanillin stain and/or UV light. Merck Geduran® 40-63  $\mu$ m silica gel was used for column chromatography.

Infrared spectra were reported in frequency of absorption using Alpha Bruker Optics spectrometer.

Melting points were recorded with a SMP3 Stuart Scientific microscope in open capillary tubes and are uncorrected.

Ethyl propiolate, (*S*)-4-phenyloxazolidin-2-one were purchased from Fluorochem and *N*,4-dimethylbenzenesulfonamide from Sigma-Aldrich. All these compounds were used without any precautions.

## Experimental procedure and characterization data for terminal alkynes SI-a

Synthetic routes of terminal alkynes were summarized in the following schemes.

**For amides precursors:**<sup>1</sup>

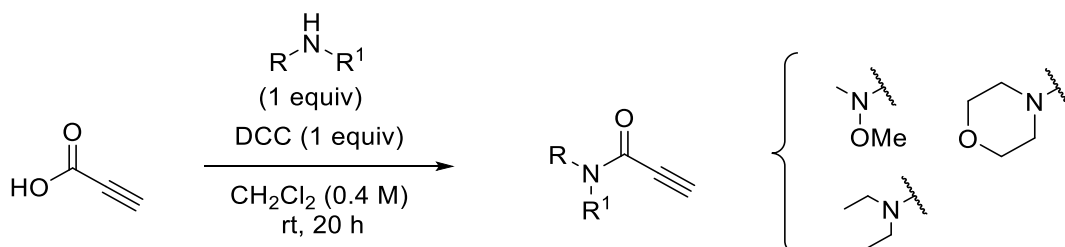

**For ketones precursors:**<sup>2</sup>

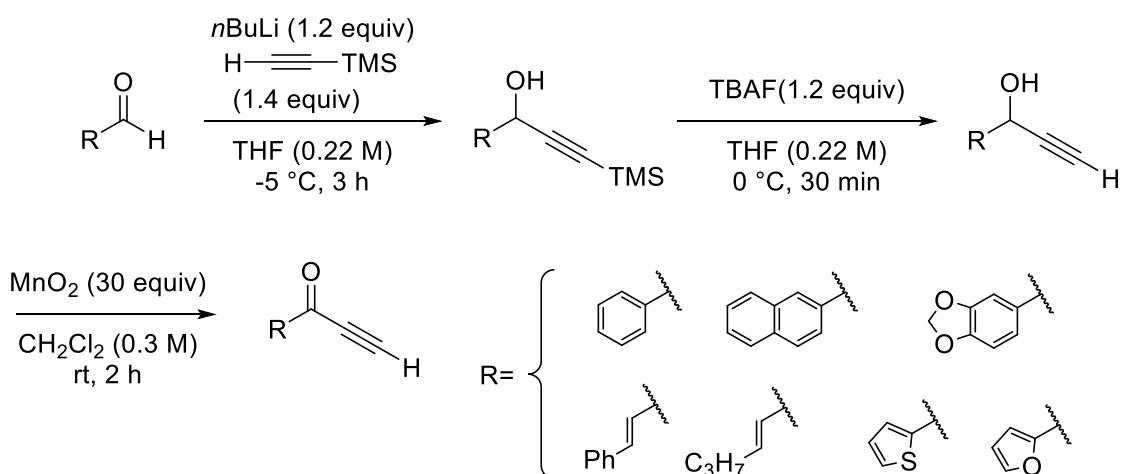

**For Ts:**<sup>3</sup>

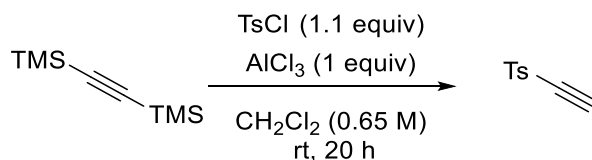

<sup>1</sup> Schleppehorst, C.; Wiesenfeldt, M. P.; Glorius, F. *Chem. Eur. J.* **2018**, *24*, 356.

<sup>2</sup> a) Beltran, F.; Fabre, I.; Ciofini, I.; Miesch, L. *Org. Lett.*, **2017**, *19*, 5042. (and references in the supporting information therein), b) Shen, Y.; Cai, S.; He, C.; Lin, X.; Lu, P.; Wang, Y. *Tetrahedron*, **2011**, *67*, 8338.

<sup>3</sup> Dai, H.; Li, C.-X.; Yu, C.; Wang, Z.; Yan, H.; Lu, C. *Org. Chem. Front.*, **2017**, *4*, 2008.

### 1-phenylprop-2-yn-1-one (SI-a2)

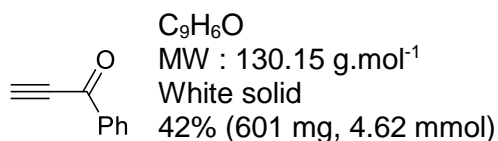

The reaction was performed on 11 mmol scale, following ketones precursors' method. Characterization data match those of the literature.<sup>2b</sup>

**<sup>1</sup>H NMR (CDCl<sub>3</sub>, 300 MHz):** δ = 8.20 – 8.14 (m, 2 H), 7.69 – 7.58 (m, 1 H), 7.55 - 7.47 (m, 2 H), 3.43 (s, 1 H) ppm.

### 1-(benzo[d][1,3]dioxol-5-yl)prop-2-yn-1-one (SI-a3)

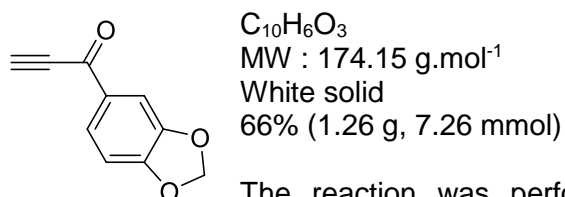

The reaction was performed on 11 mmol scale, following ketones precursors' method. Characterization data match those of the literature.<sup>4</sup>

**<sup>1</sup>H NMR (CDCl<sub>3</sub>, 300 MHz):** δ = 7.84 (dd, 1 H, *J* = 8.2 Hz, 1.7 Hz), 7.56 (d, 1 H, *J* = 1.7 Hz), 6.89 (d, 1 H, *J* = 8.2 Hz), 6.08 (s, 2 H), 3.37 (s, 1 H) ppm.

### 1-(thiophen-2-yl)prop-2-yn-1-one (SI-a4)

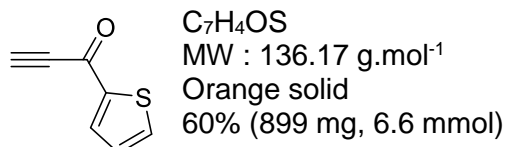

The reaction was performed on 11 mmol scale, following ketones precursors' method. Characterization data match those of the literature.<sup>4</sup>

**<sup>1</sup>H NMR (CDCl<sub>3</sub>, 400 MHz):** δ = 7.97 (dd, 1 H, *J* = 3.9 Hz, 1.1 Hz), 7.74 (dd, 1 H, *J* = 4.9 Hz, 1.1 Hz), 7.17 (dd, 1 H, *J* = 4.9 Hz, 3.9 Hz), 3.35 (s, 1 H) ppm.

### (E)-1-phenylpent-1-en-4-yn-3-one (SI-a5)

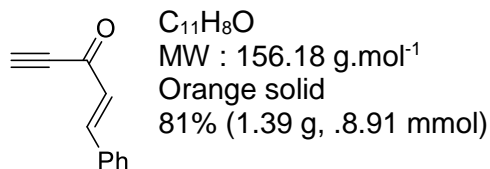

The reaction was performed on 11 mmol scale, following ketones precursors' method. Characterization data match those of the literature.<sup>2b</sup>

<sup>4</sup> Oakdale, J. S.; Sit, R. K.; Fokin, V. V. *Chem. Eur. J.* **2014**, *20*, 11101.

**<sup>1</sup>H NMR (CDCl<sub>3</sub>, 300 MHz):** δ = 7.89 (d, 1 H, *J* = 16.1 Hz), 7.62 -7.55 (m, 2 H), 7.47 – 7.39 (m, 3 H), 6.81 (d, 1 H, *J* = 16.1 Hz), 3.32 (s, 1 H) ppm.

**N-methoxy-N-methylpropiolamide (SI-a6)**

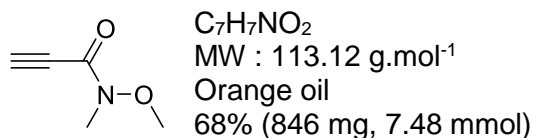

The reaction was performed on 11 mmol scale, following amides precursors' method. Characterization data match those of the literature.<sup>4</sup>

**<sup>1</sup>H NMR (CDCl<sub>3</sub>, 300 MHz):** δ = 3.79 (s, 3 H), 3.24 (br, 3 H), 3.12 (s, 1 H) ppm.

**N,N-diethylpropiolamide (SI-a7)**

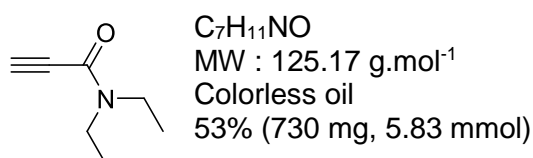

The reaction was performed on 11 mmol scale, following amides precursors' method. Characterization data match those of the literature.<sup>1</sup>

**<sup>1</sup>H NMR (CDCl<sub>3</sub>, 300 MHz):** δ = 3.60 (q, 2 H, *J* = 7.2 Hz), 3.42 (q, 2 H, *J* = 7.2 Hz), 3.03 (s, 1 H), 1.22 (t, 3 H, *J* = 7.2 Hz), 1.14 (t, 3 H, *J* = 7.2 Hz) ppm.

**1-morpholinoprop-2-yn-1-one (SI-a8)**

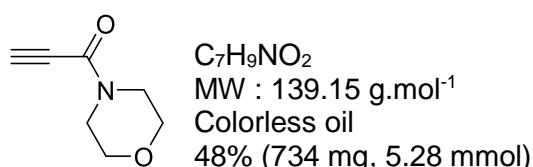

The reaction was performed on 11 mmol scale, following amides precursors' method. Characterization data match those of the literature.<sup>4</sup>

**<sup>1</sup>H NMR (CDCl<sub>3</sub>, 300 MHz):** δ = 3.78 – 3.73 (m, 2H), 3.72 – 3.68 (m, 2H), 3.67-3.61 (m, 4H), 3.13 (s, 1 H) ppm.

**1-(naphthalen-2-yl)prop-2-yn-1-one (SI-a9)**

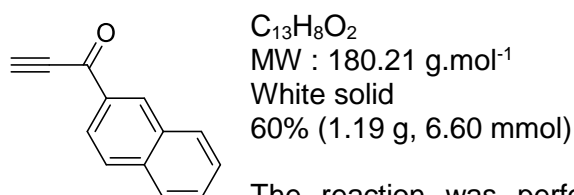

precursors' method. Characterization data match those of the literature.<sup>5</sup>

**<sup>1</sup>H NMR (CDCl<sub>3</sub>, 300 MHz):** δ = 8.76 (s, 1 H), 8.14 (dd, 1 H, *J* = 8.6 Hz, 1.7 Hz), 8.10 (dd, 1 H, *J* = 8.0 Hz, 1.7 Hz), 7.91 (dd, 2 H, *J* = 8.7 Hz, 3.3 Hz), 7.69 – 7.56 (m, 2 H), 3.50 (s, 1 H) ppm.

#### **1-(furan-2-yl)prop-2-yn-1-one (SI-a10)**

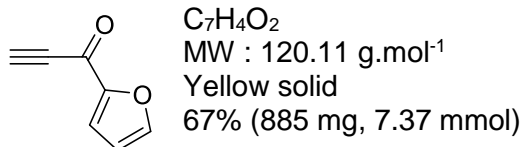

The reaction was performed on 11 mmol scale, following ketones precursors' method. Characterization data match those of the literature.<sup>2b</sup>

**<sup>1</sup>H NMR (CDCl<sub>3</sub>, 300 MHz):** δ = 7.69 (dd, 1 H, *J* = 1.7 Hz, 0.6 Hz), 7.41 (dd, 1 H, *J* = 3.5 Hz, 0.6 Hz), 6.60 (dd, 1 H, *J* = 3.5 Hz, 1.7 Hz), 3.31 (s, 1 H) ppm.

#### **(E)-oct-4-en-1-yn-3-one (SI-a11)**

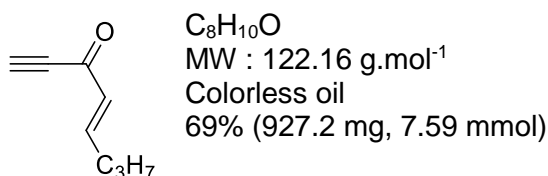

The reaction was performed on 11 mmol scale.

**<sup>1</sup>H NMR (CDCl<sub>3</sub>, 300 MHz):** δ = 7.24 (dt, 1 H, *J* = 15.8 Hz, 6.9 Hz), 6.17 (dt, 1 H, *J* = 15.8 Hz, 1.5 Hz), 3.21 (s, 1 H), 7.29 (qd, 2 H, *J* = 7.2 Hz, 1.5 Hz), 1.61 – 1.48 (m, 2 H), 0.96 (t, 3 H, *J* = 7.2 Hz) ppm.

**<sup>13</sup>C NMR (CDCl<sub>3</sub>, 125 MHz):** δ = 177.8 (C), 155.6 (CH), 131.9 (CH), 79.7 (C), 78.8 (CH), 34.6 (CH<sub>2</sub>), 21.0 (CH<sub>2</sub>), 13.6 (CH<sub>3</sub>) ppm.

**IR (neat):** ν = 2963, 2097, 1647, 1230 cm<sup>-1</sup>

**ESI-HRMS:** [M+H]<sup>+</sup> calc: 123.0804; found: 123.0807

**R<sub>f</sub>:** 0.45 (Petroleum ether/EtOAc 90:10 v/v, UV, vanillin stain)

#### **1-(ethynylsulfonyl)-4-methylbenzene (SI-a12)**

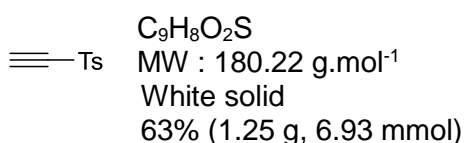

<sup>5</sup> Maeda, Y.; Kakiuchi, N.; Matsumura, S.; Nishimura, T.; Kawamura, T.; Uemura, S. *J. Org. Chem.* **2002**, *67*, 6718.

The reaction was performed on 11 mmol scale, following Ts precursors' method. Characterization data match those of the literature.<sup>6</sup>

**<sup>1</sup>H NMR (CDCl<sub>3</sub>, 300 MHz):**  $\delta$  = 7.90 (d, 2 H,  $J$  = 8.2 Hz), 7.40 (d, 2 H,  $J$  = 8.2 Hz), 3.44 (s, 1 H), 2.48 (s, 3 H) ppm.

---

<sup>6</sup> Waykole, L.; Paquette, L. A. *Org. Synth.* **1989**, 67, 149.

## Experimental procedure and characterization data for bromoalkynes SI-b

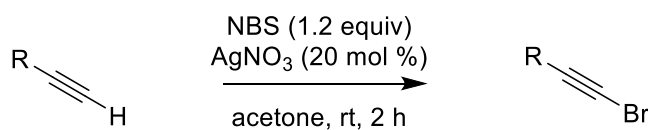

Bromoalkynes were synthesized following literature procedure using  $\text{AgNO}_3$  catalysis.<sup>7</sup>

**General procedure:** To a solution of the acetylenic (5 mmol, 1 equiv) in acetone (conc = 0.30 M) were added *N*-bromosuccinimide (6 mmol, 1.2 equiv) and  $\text{AgNO}_3$  (0.5 mmol, 10 mol %). After 1 h at room temperature, the same quantity of  $\text{AgNO}_3$  (0.5 mmol, 10 mol %) was added and the mixture was stirred at room temperature for 1 h. The resulting mixture was then filtrated and the filtrate was extracted with hexane (3 x 30 mL). The combined organic layers were washed with a 10% aqueous solution of HCl (2 x 40 mL), brine (30 mL), dried ( $\text{Na}_2\text{SO}_4$ ) and concentrated under vacuum (25°C, 200 mbar) to afford the title compounds.

*Note: this reaction is carried out away from light.*

**Detailed procedure for SI-b1:** To a solution of ethyl propiolate (500 mg, 5 mmol, 1 equiv) in anhydrous acetone (17 mL, conc = 0.30 M) were added *N*-bromosuccinimide (1.09 g, 6 mmol, 1.2 equiv) and  $\text{AgNO}_3$  (87 mg, 0.5 mmol, 10 mol %). After 1 h at room temperature, the same quantity of  $\text{AgNO}_3$  (87 mg, 0.5 mmol, 10 mol %) was added and the mixture was stirred at room temperature for 1 h. The resulting mixture was then filtrated and the filtrate was extracted with hexane (3 x 30 mL). The combined organic layers were washed with a 10% aqueous solution of HCl (2 x 40 mL), brine (30 mL), dried ( $\text{Na}_2\text{SO}_4$ ) and concentrated under vacuum (25°C, 200 mbar) to afford **SI-b1** (91%, 4.55 mmol, 805 mg).

### ethyl 3-bromopropiolate (SI-b1)

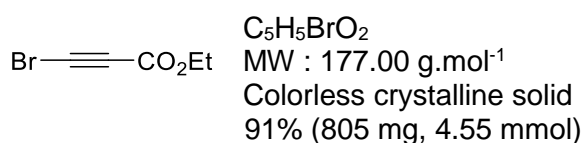

Characterization data match those of the literature.<sup>4</sup>

**<sup>1</sup>H NMR (CDCl<sub>3</sub>, 300 MHz):**  $\delta$  = 4.24 (q, 2 H,  $J$  = 7.2 Hz), 1.31 (t, 3 H,  $J$  = 7.2 Hz) ppm.

<sup>7</sup> Hofmeister, H.; Annen, K.; Laurent, H.; Wiechert, R. *Angew. Chemie Int. Ed. English* **1984**, *23*, 727–729.



### 3-bromo-1-phenylprop-2-yn-1-one (SI-b2)

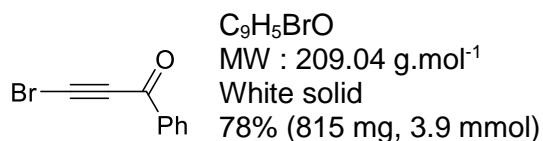

Characterization data match those of the literature.<sup>8</sup>

**<sup>1</sup>H NMR (CDCl<sub>3</sub>, 400 MHz):** δ = 8.12 (d, 2 H, *J* = 7.9 Hz), 7.63 (t, 1 H, *J* = 7.4 Hz), 7.49 (t, 2 H, *J* = 8.0 Hz) ppm.

### 1-(benzo[*d*][1,3]dioxol-5-yl)-3-bromoprop-2-yn-1-one (SI-b3)

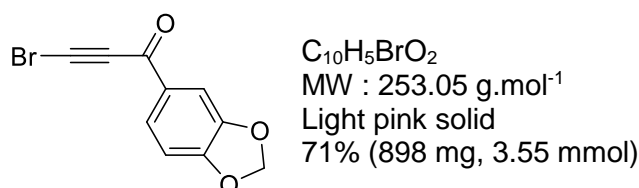

Characterization data match those of the literature.<sup>4</sup>

**<sup>1</sup>H NMR (CDCl<sub>3</sub>, 500 MHz):** δ = 7.79 (dd, 1 H, *J* = 8.2 Hz, 1.7 Hz), 7.53 (d, 1 H, *J* = 1.7 Hz), 6.89 (d, 1 H, *J* = 8.2 Hz), 6.08 (s, 2 H) ppm.

### 3-bromo-1-(thiophen-2-yl)prop-2-yn-1-one (SI-b4)

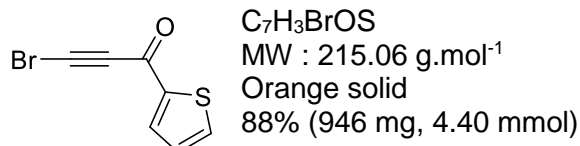

Characterization data match those of the literature.<sup>4</sup>

**<sup>1</sup>H NMR (CDCl<sub>3</sub>, 500 MHz):** δ = 7.94 (dd, 1 H, *J* = 3.8 Hz, 0.8 Hz), 7.74 (dd, 1 H, *J* = 4.9 Hz, 0.8 Hz), 7.17 (dd, 1 H, *J* = 4.9 Hz, 3.8 Hz) ppm.

### (*E*)-5-bromo-1-phenylpent-1-en-4-yn-3-one (SI-b5)

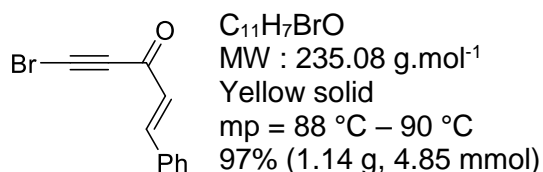

**<sup>1</sup>H NMR (CDCl<sub>3</sub>, 500 MHz):** δ = 7.83 (d, 1 H, *J* = 16.1 Hz), 7.63 -7.57 (m, 2 H), 7.49 – 7.39 (m, 3 H), 6.79 (d, 1 H, *J* = 16.1 Hz) ppm.

<sup>8</sup> Poulsen, T. B.; Bernardi, L.; Alemán, J.; Overgaard, J.; Jørgensen, K. A. *J. Am. Chem. Soc.* **2007**, *129*, 441–449.

**<sup>13</sup>C NMR (CDCl<sub>3</sub>, 125 MHz):** δ = 176.6 (C), 149.4 (CH), 133.4 (C), 131.4 (CH), 129.1 (2 CH), 128.7 (2 CH), 127.8 (CH), 78.5 (C), 57.2 (C) ppm.

**ESI-HRMS:** [M+H]<sup>+</sup> calc: 234.9753; found: 234.9768

**IR (neat):** ν = 2186, 1624, 1448, 1252, 1200 cm<sup>-1</sup>

**R<sub>f</sub>:** 0.73 (Petroleum ether/EtOAc 70:30 v/v, UV, vanillin stain)

### **3-bromo-N-methoxy-N-methylpropiolamide (SI-b6)**

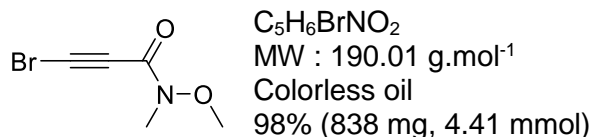

Characterization data match those of the literature.<sup>4</sup>

**<sup>1</sup>H NMR (CDCl<sub>3</sub>, 400 MHz):** δ = 3.78 (s, 3 H), 3.23 (br, 3 H) ppm

### **3-bromo-N,N-diethylpropiolamide (SI-b7)**

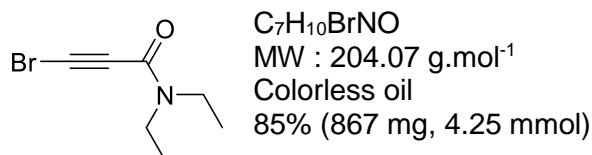

**<sup>1</sup>H NMR (CDCl<sub>3</sub>, 400 MHz):** δ = 3.57 (q, 2 H, J = 7.2 Hz), 3.41 (q, 2 H, J = 7.2 Hz), 1.22 (t, 3 H, J = 7.2 Hz), 1.13 (t, 3 H, J = 7.2 Hz) ppm.

**<sup>13</sup>C NMR (CDCl<sub>3</sub>, 125 MHz):** δ = 152.4 (C), 73.9 (C), 53.9 (C), 43.3 (CH<sub>2</sub>), 39.2 (CH<sub>2</sub>), 14.3 (CH<sub>3</sub>), 12.6 (CH<sub>3</sub>) ppm.

**ESI-HRMS:** [M+H]<sup>+</sup> calc: 205.0019; found: 204.0007

**IR (neat):** ν = 2976, 2196, 1618, 1426, 1278 cm<sup>-1</sup>

**R<sub>f</sub>:** 0.66 (Petroleum ether/EtOAc 60:40 v/v, UV, vanillin stain)

### **3-bromo-1-morpholinoprop-2-yn-1-one (SI-b8)**

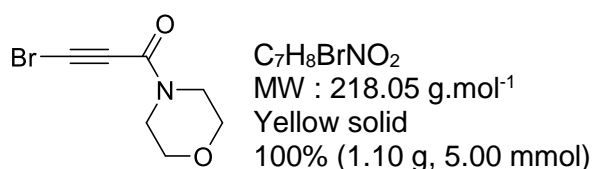

Characterization data match those of the literature.<sup>4</sup>

**<sup>1</sup>H NMR (CDCl<sub>3</sub>, 400 MHz):** δ 3.67-3.61 (m, 4H), 3.59-3.53 (m, 4H) ppm.

## Experimental procedure and characterization data for sulfonamides **1** and **SI-c**

### • Method A

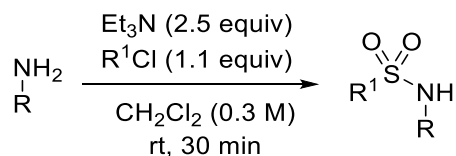

**General procedure:** **SI-c1** (= **1**), **SI-c2**, **SI-c3**, **SI-c5**, **SI-c6**, **SI-c7**, **SI-c8** were prepared according to the literature with minors modifications.<sup>9</sup>

The primary amine (4.5 mmol, 1 equiv) was dissolved in CH<sub>2</sub>Cl<sub>2</sub> (0.3 M), TsCl (4.95 mmol, 1.1 equiv) and Et<sub>3</sub>N (11.25 mmol, 2.5 equiv) were added successively. After stirring at room temperature for 30 minutes, the mixture was diluted with aqueous HCl (10 wt%, 10 mL). The aqueous layer was extracted with CH<sub>2</sub>Cl<sub>2</sub> (3 x 15 mL) and then once with Et<sub>2</sub>O (5 mL). The combined organic extracts were washed with brine (40 mL), dried (Na<sub>2</sub>SO<sub>4</sub>), concentrated under reduce pressure (15 mbar, 25 °C) and purified by column chromatography on silica gel using a mixture of petroleum ether/EtOAc as eluent to afford the desired product **SI-c**.

**Detailed procedure for 1:** The primary amine (4.5 mmol, 482 mg, 1 equiv) was dissolved in CH<sub>2</sub>Cl<sub>2</sub> (0.3 M), TsCl (4.95 mmol, 940 mg, 1.1 equiv) and Et<sub>3</sub>N (11.25 mmol, 1.56 mL, 2.5 equiv) were added successively. After stirring at room temperature for 30 minutes, the mixture was diluted with aqueous HCl (10 wt%, 10 mL). The aqueous layer was extracted with CH<sub>2</sub>Cl<sub>2</sub> (3 x 15 mL) and then once with Et<sub>2</sub>O (5 mL). The combined organic extracts were washed with brine (40 mL), dried (Na<sub>2</sub>SO<sub>4</sub>), concentrated under reduce pressure (15 mbar, 25 °C) and purified by column chromatography on silica gel using a mixture of petroleum ether/EtOAc as eluent to afford the desired product **1** as a white powder (85%, 3.83 mmol, 999.94 mg).

### • Method B

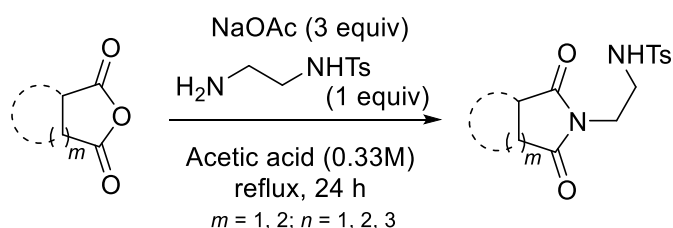

<sup>9</sup> Huang, W.; Shen, Q.; Wang, J.; Zhou, X. *J. Org. Chem.* **2008**, *73*, 1586.

**General procedure: SI-c4 and SI-c9** were prepared according to the literature without modifications.<sup>10</sup>

A mixture of the mono tosylated diamine (5 mmol, 1 equiv), sodium acetate (15 mmol, 3 equiv) and appropriate anhydride (5 mmol, 1 equiv) were taken in glacial acetic acid (0.33 M) and refluxed for 24 h. The mixture was cooled to rt and evaporated to dryness under vacuum. The corresponding residue was diluted with sat. NaHCO<sub>3</sub> (20 mL) and extracted with EtOAc (3 x 25 mL). The combined organic extracts were dried (Na<sub>2</sub>SO<sub>4</sub>), concentrated under reduce pressure (15 mbar, 25 °C) and purified by column chromatography on silica gel using a mixture of petroleum ether/EtOAc, CH<sub>2</sub>Cl<sub>2</sub>/MeOH or CH<sub>2</sub>Cl<sub>2</sub>/acetone as eluent to afford the desired product **SI-c4** or **SI-c9**.

#### **N-benzyl-4-methylbenzenesulfonamide (SI-c1 = 1)**

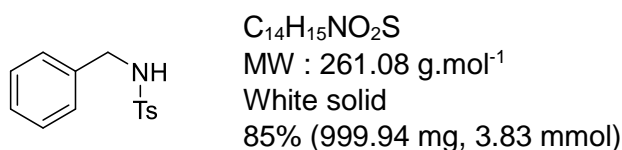

For clarity reason in the manuscript, **SI-c1** is referred to compound **1**. **SI-c1** was prepared according to method A. Characterization data match those of the literature.<sup>9</sup>

**<sup>1</sup>H NMR (CDCl<sub>3</sub>, 300 MHz):** δ = 7.76 (d, 2 H, *J* = 8.2 Hz), 7.33 – 7.24 (m, 5 H), 7.23 – 7.17 (m, 2 H), 4.62 (t, 1 H, *J* = 5.6 Hz), 4.12 (d, 2 H, *J* = 6.1 Hz), 2.44 (s, 3 H) ppm.

#### **N-benzyl-2-nitrobenzenesulfonamide (SI-c2)**

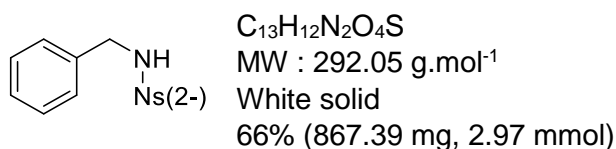

**SI-c2** was prepared according to method A. Characterization data match those of the literature.<sup>11</sup>

**<sup>1</sup>H NMR (CDCl<sub>3</sub>, 300 MHz):** δ = 8.00 (dd, 1 H, *J* = 7.6 Hz, 1.6 Hz), 7.82 (dd, 1 H, *J* = 7.6 Hz, 1.6 Hz), 7.66 (dtd, 2 H, *J* = 23.1 Hz, 7.6 Hz, 1.6 Hz), 7.25 – 7.19 (m, 5 H), 5.73 (t, 1 H, *J* = 6.1 Hz), 4.32 (d, 2 H, *J* = 6.1 Hz) ppm.

#### **N,N-dimethyl-N-(phenylmethyl) sulfamide (SI-c3)**

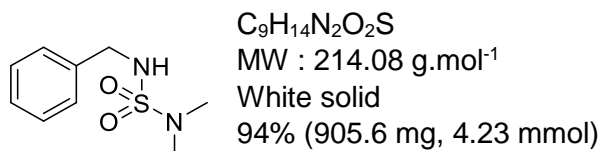

<sup>10</sup> Maity, A. K.; Roy, S. *Adv. Synth. Catal.* **2014**, 356, 2627.

<sup>11</sup> Baslé, E.; Jean, M.; Gouault, N.; Renault, J.; Uriac, P. *Tetrahedron Lett.* **2007**, 48, 8138.

**SI-c3** was prepared according to method A. Characterization data match those of the literature.<sup>12</sup>

**<sup>1</sup>H NMR (CDCl<sub>3</sub>, 300 MHz):**  $\delta$  = 7.39 – 7.28 (m, 5 H), 4.52 (t, 1 H,  $J$  = 5.6 Hz), 4.22 (d, 2 H,  $J$  = 6.1 Hz), 2.77 (s, 6 H) ppm.

**N-(2-(1,3-dioxo-1,3,3a,4,7,7a-hexahydro-2H-isoindol-2-yl)ethyl)ethyl)-4-methylbenzene sulfonamide (SI-c4)**

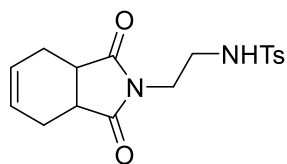

C<sub>17</sub>H<sub>20</sub>N<sub>2</sub>O<sub>4</sub>S

MW : 348.42 g.mol<sup>-1</sup>

White solid

80% (1.39 g, 3.99 mmol)

**SI-c4** was prepared according to method B. The product was obtained by column chromatography on silica gel using a step gradient of acetone in CH<sub>2</sub>Cl<sub>2</sub> (0 to 5%). Characterization data match those of the literature.<sup>13</sup>

**<sup>1</sup>H NMR (CDCl<sub>3</sub>, 500 MHz):**  $\delta$  = 7.69 (d, 2 H,  $J$  = 8.1 Hz), 7.28 (d, 2 H,  $J$  = 8.1 Hz), 5.86 (t, 2 H,  $J$  = 3.0 Hz), 5.33 (t, 1 H,  $J$  = 6.3 Hz, NH), 3.57 (dt, 2 H,  $J$  = 5.8 Hz, 3.0 Hz), 3.13 – 3.05 (m, 4 H), 2.58 – 2.50 (m, 2 H), 2.40 (s, 3 H), 2.25 – 2.17 (m, 2 H) ppm.

**N-butyl-4-methylbenzenesulfonamide (SI-c5)**

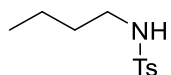

C<sub>11</sub>H<sub>17</sub>NO<sub>2</sub>S

MW : 227.32 g.mol<sup>-1</sup>

White solid

93% (952.5 mg, 4.19 mmol)

**SI-c5** was prepared according to method A. Characterization data match those of the literature.<sup>14</sup>

**<sup>1</sup>H NMR (CDCl<sub>3</sub>, 500 MHz):**  $\delta$  = 7.75 (d, 2 H,  $J$  = 8.2 Hz), 7.31 (d, 2 H,  $J$  = 8.2 Hz), 4.27 (t, 1 H,  $J$  = 6.1 Hz), 2.94 (q, 2 H,  $J$  = 6.7 Hz), 2.43 (s, 3 H), 1.50 – 1.38 (m, 2 H), 1.36 – 1.22 (m, 2 H), 0.85 (t, 3 H,  $J$  = 7.3 Hz) ppm.

**N-benzylmethanesulfonamide (SI-c6)**

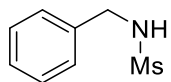

C<sub>8</sub>H<sub>11</sub>NO<sub>2</sub>S

MW : 185.05 g.mol<sup>-1</sup>

White solid

100% (832.7 mg, 4.50 mmol)

**SI-c6** was prepared according to method A. Characterization data match those of the literature.<sup>15</sup>

<sup>12</sup> Unterhalt, B.; Seebach, E. *Arch. Pharm.* **1980**, *314*, 51.

<sup>13</sup> Andna, L.; Miesch, L. *Org. Lett.* **2018**, *20*, 3430.

<sup>14</sup> Das, B.; Reddy, P. R.; Sudhakar, C.; Lingaiah, M. *Tetrahedron Lett.* **2011**, *52*, 3521.

**<sup>1</sup>H NMR (CDCl<sub>3</sub>, 300 MHz):** δ = 7.38 – 7.29 (m, 5 H), 5.00 (t, 1 H, *J* = 5.4 Hz), 4.30 (d, 2 H, *J* = 6.2 Hz), 2.83 (s, 3 H) ppm.

#### **N-benzyl-4-nitrobenzenesulfonamide (SI-c7)**

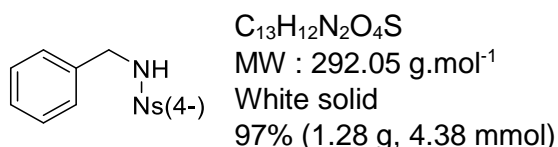

**SI-c7** was prepared according to method A. Characterization data match those of the literature.<sup>15</sup>

**<sup>1</sup>H NMR (CDCl<sub>3</sub>, 300 MHz):** δ = 8.29 (d, 2 H, *J* = 8.8 Hz), 7.97 (d, 2 H, *J* = 8.8 Hz), 7.26 – 7.22 (m, 3 H), 7.17 – 7.14 (m, 2 H), 5.03 (t, 1 H, *J* = 5.4 Hz), 4.21 (d, 2 H, *J* = 5.4 Hz) ppm.

#### **N-cyclohexyl-4-methylbenzenesulfonamide (SI-c8)**

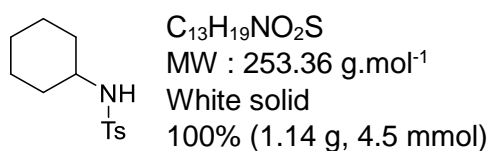

**SI-c8** was prepared according to method A. Characterization data match those of the literature.<sup>16</sup>

**<sup>1</sup>H NMR (CDCl<sub>3</sub>, 500 MHz):** δ = 7.76 (d, 2 H, *J* = 8.2 Hz), 7.29 (d, 2 H, *J* = 8.2 Hz), 4.54 (d, 1 H, *J* = 7.7 Hz), 3.19 – 3.05 (m, 1 H), 2.41 (s, 3 H), 1.78 – 1.70 (m, 2 H), 1.68 – 1.57 (m, 2 H), 1.55 – 1.45 (m, 1 H), 1.29 – 1.06 (m, 5 H) ppm.

#### **N-(2-((4-methylphenyl)sulfonamido)ethyl)acetamide (SI-c9)**

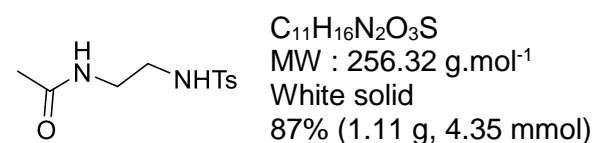

**SI-c9** was prepared according to method B starting from glutaric anhydride. The product was obtained by column chromatography on silica gel using a step gradient of acetone in CH<sub>2</sub>Cl<sub>2</sub> (0 to 5%). Characterization data match those of the literature.<sup>17</sup>

**<sup>1</sup>H NMR (CDCl<sub>3</sub>, 500 MHz):** δ = 7.72 (d, 2 H, *J* = 8.2 Hz), 7.29 (d, 2 H, *J* = 8.2 Hz), 6.56 (t, 1 H, *J* = 5.3 Hz, NH), 5.93 (t, 1 H, *J* = 5.7 Hz, NH), 3.34 (q, 2 H, *J* = 5.7 Hz), 3.04 (q, 2 H, *J* = 5.3 Hz), 2.41 (s, 3 H), 1.93 (s, 3 H) ppm.

<sup>15</sup> Hamid, M. H. S. A.; Allen, C. L.; Lamb, G. W.; Maxwell, A. C.; Maytum, H C.; Watson, A. J. A.; Williams, J. M. J. *J. Am. Chem. Soc.* **2009**, *131*, 1766.

<sup>16</sup> Shaabani, A.; Soleimani, E.; Rezayan, A. H. *Tetrahedron Lett.* **2007**, *48*, 2185.

<sup>17</sup> Liu, Q.; Liu, Z.; Zhou, Y.-L.; Zhang, W.; Yang, L.; Liu, Z.-L.; Yu, W. *Synlett* **2005**, *16*, 2510.

## Characterization data for Michael double addition product 3

3 was obtained with some bases when screening was done.

### ethyl 3,3-bis((N-benzyl-4-methylphenyl)sulfonamido)acrylate (3)

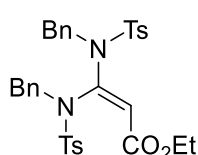

$C_{33}H_{34}N_2O_6S_2$   
MW : 618.76 g.mol<sup>-1</sup>  
Colorless oil

**<sup>1</sup>H NMR (CDCl<sub>3</sub>, 500 MHz):**  $\delta$  = 7.51 (d, 2 H,  $J$  = 8.2 Hz), 7.543 (d, 2 H,  $J$  = 8.2 Hz), 7.29 – 7.24 (m, 4 H), 7.16 – 7.09 (m, 10 H), 6.84 (d, 2 H,  $J$  = 8.2 Hz), 5.76 (s, 1 H), 4.63 – 4.54 (m, 2 H), 3.98 (q, 2 H,  $J$  = 7.1 Hz), 2.38 (s, 3 H), 2.36 (s, 3 H), 1.18 (t, 3 H,  $J$  = 7.1 Hz) ppm.

**<sup>13</sup>C NMR (CDCl<sub>3</sub>, 125 MHz):**  $\delta$  = 163.9 (C), 144.2 (C), 144.1 (C), 144.0 (C), 136.8 (C), 135.9 (C), 135.8 (C), 135.1 (C), 129.4 (2 CH), 129.3 (2 CH), 129.1 (2 CH), 128.8 (2 CH), 128.2 (2 CH), 128.1 (4 CH), 127.9 (CH), 127.6 (2 CH), 127.1 (CH), 108.5 (CH), 60.2 (CH<sub>2</sub>), 53.2 (CH<sub>2</sub>), 50.7 (CH<sub>2</sub>), 21.5 (CH<sub>3</sub>), 21.5 (CH<sub>3</sub>), 14.1 (CH<sub>3</sub>) ppm.

**IR (neat):**  $\nu$  = 2925, 1715, 1597, 13757, 1161, 1085 cm<sup>-1</sup>

**ESI-HRMS:** [M+Na]<sup>+</sup> calc: 641.1750; found: 641.1753

**R<sub>f</sub>:** 0.38 (Petroleum ether/EtOAc 80:20 v/v, UV, ninhydrin stain)

## Experimental procedure and characterization data for ynesulfonamides **2**, **4** - **14**

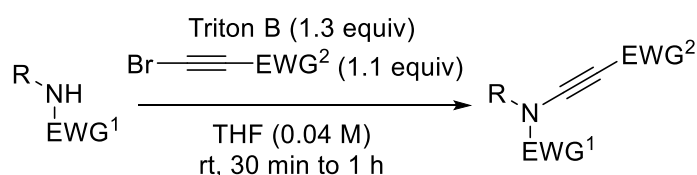

**General procedure:** The secondary amine **SI-c** (0.8 mmol, 1 equiv) was dissolved in THF (0.04 M). The bromoalkyne **SI-b** (0.88 mmol, 1.1 equiv), followed by Triton B 40%wt in water (1.04 mmol, 1.3 equiv) were added at room temperature. Reaction was monitored by TLC and once judge completed by the full consumption of the starting material, the mixture was diluted with sat. NH<sub>4</sub>Cl (10 mL). The aqueous layer was extracted with Et<sub>2</sub>O (3 x 15 mL). The combined organic extracts were dried (Na<sub>2</sub>SO<sub>4</sub>), concentrated under reduce pressure (15 mbar, 25 °C) and purified by column chromatography on silica gel using a mixture of petroleum ether/EtOAc as eluent to afford the desired product.

**Detailed procedure for 11 on 8 mmol scale:** The secondary amine **SI-c1** (8 mmol, 2.1 g, 1 equiv) was dissolved in THF (0.04 M). The bromoalkyne **SI-b5** (8.8 mmol, 2.07 g, 1.1 equiv), followed by Triton B 40%wt in water (10.4 mmol, 4.70 mL, 1.3 equiv) were added at room temperature. Reaction was monitored by TLC and once judge completed by the full consumption of the starting material, the mixture was diluted with sat. NH<sub>4</sub>Cl (100 mL). The aqueous layer was extracted with Et<sub>2</sub>O (3 x 50 mL). The combined organic extracts were dried (Na<sub>2</sub>SO<sub>4</sub>), concentrated under reduce pressure (15 mbar, 25 °C) and purified by column chromatography on silica gel using a mixture of petroleum ether/EtOAc as eluent to afford **2** as a yellow oil (100%, 8.0 mmol, .333 g).

### **ethyl 3-((N-benzyl-4-methylphenyl)sulfonamido)propiolate (**2**)**

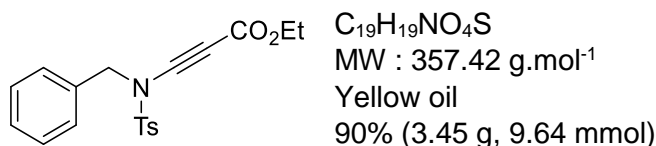

**2** was prepared starting from **SI-c1** and **SI-b1**, starting from 10.71 mmol of **SI-c1**. Characterization data match those of the literature.<sup>18</sup>

**<sup>1</sup>H NMR (CDCl<sub>3</sub>, 500 MHz):** δ = 7.65 (d, 2 H, J = 8.2 Hz), 7.28 – 7.20 (m, 7 H), 4.57 (s, 2 H), 4.14 (q, 2 H, J = 7.2 Hz), 2.9 (s, 3 H), 1.23 (t, 3 H, J = 7.2 Hz), ppm.

<sup>18</sup> Villeneuve, K.; Riddell, N.; Tam, W. *Tetrahedron* **2006**, 62, 3823.



**ethyl 3-((N-benzyl-2-nitrophenyl)sulfonamido)propiolate (4)**

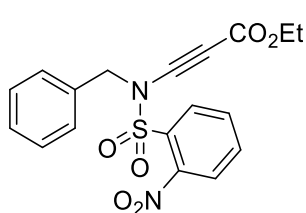

$C_{18}H_{16}N_2O_6S$   
MW : 388.39 g.mol<sup>-1</sup>  
Orange solid  
mp = 71 °C – 73 °C  
69% (213.6 mg, 0.55 mmol)

**4** was prepared starting from **SI-c2** and **SI-b1**.

**<sup>1</sup>H NMR (CDCl<sub>3</sub>, 500 MHz):** δ = 8.21 (dd, 1 H, *J* = 7.8 Hz, 1.3 Hz), 7.86 – 7.65 (m, 3 H), 7.43 – 7.34 (m, 5 H), 4.85 (s, 2 H), 4.15 (q, 2 H, *J* = 7.1 Hz), 1.25 (t, 3 H, *J* = 7.1 Hz), ppm.

**<sup>13</sup>C NMR (CDCl<sub>3</sub>, 125 MHz):** δ = 153.6 (C), 147.7 (C), 135.3 (CH), 133.6 (C), 132.8 (CH), 132.2 (CH), 130.1 (C), 128.8 (3 CH), 128.7 (2 CH), 124.1 (CH), 80.7 (C), 69.1 (C), 61.6 (CH<sub>2</sub>), 56.2 (CH<sub>2</sub>), 14.0 (CH<sub>3</sub>) ppm.

**IR (neat):** ν = 2221, 1703, 1544, 1377, 1176, 1150 cm<sup>-1</sup>

**ESI-HRMS:** [M+Na]<sup>+</sup> calc: 411.0621; found: 411.0633

**R<sub>f</sub>:** 0.57 (Petroleum ether/EtOAc 70:30 v/v, UV, ninhydrin stain)

**ethyl 3-(benzyl(N,N-dimethylsulfamoyl)amino)propiolate (5)**

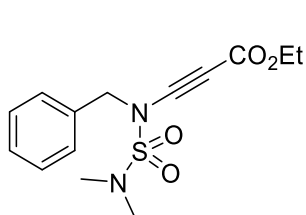

$C_{14}H_{18}N_2O_4S$   
MW : 310.37 g.mol<sup>-1</sup>  
Yellow oil  
51% (127.3 mg, 0.41 mmol)

**5** was prepared starting from **SI-c3** and **SI-b1**. 27% of the starting sulfonamide **SI-c3** was recovered.

**<sup>1</sup>H NMR (CDCl<sub>3</sub>, 500 MHz):** δ = 7.45 – 7.34 (m, 5 H), 4.64 (s, 2 H), 4.19 (q, 2 H, *J* = 7.2 Hz), 2.92 (s, 6 H), 1.27 (t, 3 H, *J* = 7.2 Hz), ppm.

**<sup>13</sup>C NMR (CDCl<sub>3</sub>, 125 MHz):** δ = 154.2 (C), 134.6 (C), 128.7 (2 CH), 128.7 (3 CH), 83.9 (C), 68.4 (C), 61.4 (CH<sub>2</sub>), 55.6 (CH<sub>2</sub>), 38.7 (2 CH<sub>3</sub>), 14.1 (CH<sub>3</sub>) ppm.

**IR (neat):** ν = 2210, 1699, 1376, 1163, 1147 cm<sup>-1</sup>

**ESI-HRMS:** [M+Na]<sup>+</sup> calc: 333.0879; found: 333.0888

**R<sub>f</sub>:** 0.45 (Petroleum ether/EtOAc 80:20 v/v, UV, vanillin stain)

**ethyl 3-((N-(2-(1,3-dioxo-1,3,3a,4,7,7a-hexahydro-2H-isoindol-2-yl)ethyl)-4-methylphenyl)sulfonamido)propiolate (6)**

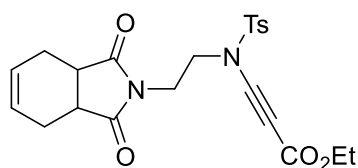

$C_{22}H_{24}N_2O_6S$   
MW : 444.50 g.mol<sup>-1</sup>  
Orange oil  
93% (328.9 mg, 0.74 mmol)

**6** was prepared starting from **SI-c4** and **SI-b1**. Characterization data match those of the literature.<sup>13</sup>

**<sup>1</sup>H NMR (CDCl<sub>3</sub>, 500 MHz):**  $\delta$  = 7.78 (d, 2 H,  $J$  = 8.3 Hz), 7.37 (d, 2 H,  $J$  = 8.3 Hz), 5.88 (dd, 2 H,  $J$  = 4.2 Hz, 2.3 Hz), 4.20 (q, 2 H,  $J$  = 7.2 Hz), 3.74 (dd, 2 H,  $J$  = 6.5 Hz, 4.7 Hz), 3.61 (dd, 2 H,  $J$  = 6.5 Hz, 4.7 Hz), 3.15 (dd, 2 H,  $J$  = 5.3 Hz, 2.3 Hz), 2.62 – 2.52 (m, 2 H), 2.45 (s, 3 H), 2.28 – 2.20 (m, 2 H), 1.29 (t, 3 H,  $J$  = 7.2 Hz), ppm.

**ethyl 3-((N-butyl-4-methylphenyl)sulfonamido)propiolate (7)**

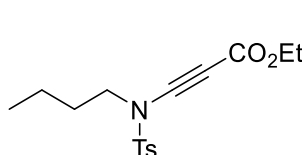

$C_{16}H_{21}NO_4S$   
MW : 323.41 g.mol<sup>-1</sup>  
Colorless oil  
50% (129.4 mg, 0.40 mmol)

**7** was prepared starting from **SI-c5** and **SI-b1**.

**<sup>1</sup>H NMR (CDCl<sub>3</sub>, 500 MHz):**  $\delta$  = 7.81 (d, 2 H,  $J$  = 8.2 Hz), 7.37 (d, 2 H,  $J$  = 8.2 Hz), 4.22 (q, 2 H,  $J$  = 7.2 Hz), 3.41 (t, 2 H,  $J$  = 7.4 Hz), 2.46 (s, 3 H), 1.68 – 1.59 (m, 2 H), 1.35 – 1.26 (m, 5 H), 0.90 (t, 3 H,  $J$  = 7.4 Hz) ppm.

**<sup>13</sup>C NMR (CDCl<sub>3</sub>, 125 MHz):**  $\delta$  = 154.1 (C), 145.3 (C), 134.2 (C), 130.0 (2 CH), 127.7 (2 CH), 82.5 (C), 67.6 (C), 61.5 (CH<sub>2</sub>), 51.1 (CH<sub>2</sub>), 29.9 (CH<sub>2</sub>), 21.6 (CH<sub>3</sub>), 19.3 (CH<sub>2</sub>), 14.1 (CH<sub>3</sub>), 13.4 (CH<sub>3</sub>) ppm.

**IR (neat):**  $\nu$  = 2873, 2216, 1704, 1365, 1168 cm<sup>-1</sup>

**ESI-HRMS:** [M+Na]<sup>+</sup> calc: 346.1083; found: 346.1088

**R<sub>f</sub>:** 0.52 (Petroleum ether/EtOAc 80:20 v/v, UV, vanillin stain)

**N-benzyl-4-methyl-N-(3-oxo-3-phenylprop-1-yn-1-yl)benzenesulfonamide (8)**

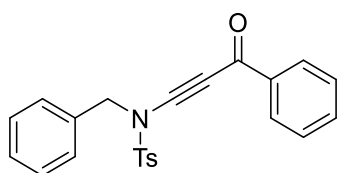

$C_{23}H_{19}NO_3S$   
MW : 389.47 g.mol<sup>-1</sup>  
Yellow solid  
100% (311.6 mg, 0.80 mmol)

**8** was prepared starting from **SI-c1** and **SI-b2**. Characterization

data match those of the literature.<sup>19</sup>

**<sup>1</sup>H NMR (CDCl<sub>3</sub>, 500 MHz):**  $\delta$  = 7.91 (d, 2 H,  $J$  = 8.2 Hz), 7.45 – 7.41 (m, 3 H), 7.35 – 7.32 (m, 3 H); 7.29 (d, 2 H,  $J$  = 8.2 Hz), 7.25 – 7.21 (m, 2 H), 7.20 – 7.16 (m, 2 H), 5.05 (s, 2 H), 2.41 (s, 3 H) ppm.

***N*-(3-(benzo[d][1,3]dioxol-5-yl)-3-oxoprop-1-yn-1-yl)-*N*-benzyl-4-methylbenzenesulfonamide (9)**

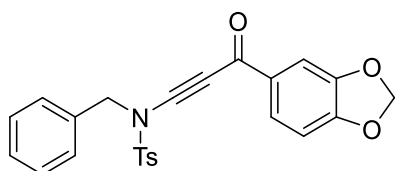

C<sub>24</sub>H<sub>19</sub>NO<sub>5</sub>S  
MW : 433.48 g.mol<sup>-1</sup>  
Yellow solid  
mp = 125 °C – 127 °C  
90% (312.1 mg, 0.72 mmol)

**9** was prepared starting from **SI-c1** and **SI-b3**.

**<sup>1</sup>H NMR (CDCl<sub>3</sub>, 500 MHz):**  $\delta$  = 7.76 (d, 2 H,  $J$  = 8.2 Hz), 7.48 (dd, 1 H,  $J$  = 8.2 Hz, 1.3 Hz), 7.38 (d, 1 H,  $J$  = 1.3 Hz), 7.36 – 7.29 (m, 7 H), 6.79 (d, 1 H,  $J$  = 8.2 Hz), 6.04 (s, 2 H), 4.66 (s, 2 H), 2.43 (s, 3 H) ppm.

**<sup>13</sup>C NMR (CDCl<sub>3</sub>, 125 MHz):**  $\delta$  = 175.2 (C), 152.5 (C), 148.2 (C), 145.8 (C), 134.4 (C), 133.5 (C), 132.0 (C), 130.3 (2 CH), 129.1 (2 CH), 129.0 (3 CH), 127.9 (2 CH), 126.5 (CH), 108.1 (2 CH), 102.1 (CH<sub>2</sub>), 89.6 (C), 76.5 (C), 55.6 (CH<sub>2</sub>), 21.9 (CH<sub>3</sub>) ppm.

**IR (neat):**  $\nu$  = 2215, 1628, 1598, 1144, 1256, 1143 cm<sup>-1</sup>

**ESI-HRMS:** [M+H]<sup>+</sup> calc: 434.1057; found: 434.1082

**R<sub>f</sub>:** 0.44 (Petroleum ether/EtOAc 70:30 v/v, UV, vanillin stain)

***N*-(3-(thiophen-2-yl)-3-oxoprop-1-yn-1-yl)-*N*-benzyl-4-methylbenzenesulfonamide (10)**

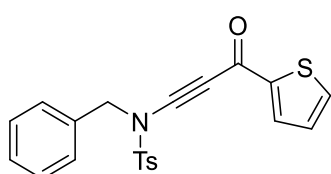

C<sub>21</sub>H<sub>17</sub>NO<sub>3</sub>S<sub>2</sub>  
MW: 395.49 g.mol<sup>-1</sup>  
Orange solid  
mp = 86 °C – 88 °C  
92% (292.6 mg, 0.74 mmol)

**10** was prepared starting from **SI-c1** and **SI-b4**.

**<sup>1</sup>H NMR (CDCl<sub>3</sub>, 500 MHz):**  $\delta$  = 7.76 (d, 2 H,  $J$  = 8.3 Hz), 7.64 (ddd, 2 H,  $J$  = 13.6 Hz, 4.5 Hz, 1.3 Hz), 7.34 – 7.28 (m, 7 H), 7.09 (dd, 1 H,  $J$  = 4.8 Hz, 4.0 Hz), 4.66 (s, 2 H), 2.43 (s, 3 H) ppm.

**<sup>13</sup>C NMR (CDCl<sub>3</sub>, 125 MHz):**  $\delta$  = 168.7 (C), 145.6 (C), 144.6 (C), 134.4 (CH), 134.2 (C), 134.0 (CH), 133.2 (C), 130.0 (2 CH), 128.8 (2 CH), 128.7 (3 CH), 128.2 (CH), 127.7 (2 CH), 88.9 (C), 75.4 (C), 55.5 (CH<sub>2</sub>), 21.6 (CH<sub>3</sub>) ppm.

<sup>19</sup> Al-Rashid, Z. F.; Johnson, W. L.; Hsung, R. P.; Wei, Y.; Yao, P.-Y.; Liu, R.; Zhao, K. *J. Org. Chem.* **2008**, *73*, 8780.

**IR (neat):**  $\nu = 2180, 1616, 1413, 1180 \text{ cm}^{-1}$

**ESI-HRMS:**  $[M+H]^+$  calc: 396.0723; found: 396.0749

**R<sub>f</sub>:** 0.51 (Petroleum ether/EtOAc 70:30 v/v, UV, vanillin stain)

**(E)-N-benzyl-4-methyl-N-(3-oxo-5-phenylpent-4-en-1-yn-1-yl)benzenesulfonamide (11)**

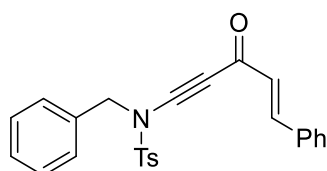

$C_{25}H_{21}NO_3S$   
MW : 415.51  $\text{g}\cdot\text{mol}^{-1}$   
Yellow oil  
100% (3.33 g, 8.0 mmol)

**11** was prepared starting from **SI-c1** and **SI-b5**, starting from 8 mmol of **SI-c1**.

**<sup>1</sup>H NMR (CDCl<sub>3</sub>, 500 MHz):**  $\delta = 7.76$  (d, 2 H,  $J = 8.2$  Hz),  $7.73$  (d, 1 H,  $J = 16.3$  Hz),  $7.58 - 7.52$  (m, 2 H),  $7.44 - 7.39$  (m, 3 H),  $7.36 - 7.27$  (m, 7 H),  $6.67$  (d, 1 H,  $J = 16.3$  Hz),  $4.65$  (s, 2 H),  $2.43$  (s, 3 H) ppm.

**<sup>13</sup>C NMR (CDCl<sub>3</sub>, 125 MHz):**  $\delta = 177.2$  (C),  $147.6$  (CH),  $145.5$  (C),  $134.3$  (C),  $134.2$  (C),  $133.4$  (C),  $130.8$  (CH),  $130.1$  (2 CH),  $128.9$  (2 CH),  $128.8$  (2 CH),  $128.7$  (CH),  $128.7$  (2 CH),  $128.5$  (2 CH),  $128.2$  (CH),  $127.6$  (2 CH),  $89.0$  (C),  $75.5$  (C),  $55.3$  (CH<sub>2</sub>),  $21.6$  (CH<sub>3</sub>) ppm.

**IR (neat):**  $\nu = 2923, 2192, 1596, 1328, 1156 \text{ cm}^{-1}$

**ESI-HRMS:**  $[M+Na]^+$  calc: 438.1134; found: 438.1128

**R<sub>f</sub>:** 0.60 (Petroleum ether/EtOAc 70:30 v/v, UV, ninhydrin stain)

**3-((N-benzyl-4-methylphenyl)sulfonamido)-N,N-diethylpropiolamide (12)**

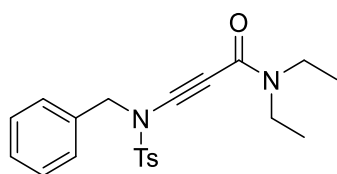

$C_{21}H_{24}N_2O_3S$   
MW : 384.50  $\text{g}\cdot\text{mol}^{-1}$   
Yellow oil  
57% (176.9 mg, 0.46 mmol)

**12** was prepared starting from **SI-c1** and **SI-b7**. 31% of the sulfonamide **SI-c1** was recovered.

**<sup>1</sup>H NMR (CDCl<sub>3</sub>, 500 MHz):**  $\delta = 7.68$  (d, 2 H,  $J = 8.3$  Hz),  $7.29 - 7.24$  (m, 7 H),  $4.55$  (s, 2 H),  $3.32$  (qd, 4 H,  $J = 7.4$  Hz,  $6.7$  Hz),  $2.40$  (s, 3 H),  $1.05$  (td, 6 H,  $J = 7.4$  Hz,  $4.0$  Hz), ppm.

**<sup>13</sup>C NMR (CDCl<sub>3</sub>, 125 MHz):**  $\delta = 153.7$  (C),  $145.2$  (C),  $134.5$  (C),  $133.7$  (C),  $129.9$  (2 CH),  $128.6$  (4 CH),  $128.5$  (CH),  $127.5$  (2 CH),  $84.0$  (C),  $68.1$  (C),  $55.2$  (CH<sub>2</sub>),  $42.9$  (CH<sub>2</sub>),  $38.8$  (CH<sub>2</sub>),  $21.6$  (CH<sub>3</sub>),  $14.2$  (CH<sub>3</sub>),  $12.8$  (CH<sub>3</sub>) ppm.

**IR (neat):**  $\nu = 2216, 1618, 1365, 1168 \text{ cm}^{-1}$

**ESI-HRMS:**  $[M+H]^+$  calc: 385.1580; found: 385.1584

**R<sub>f</sub>:** 0.53 (Petroleum ether/EtOAc 60:40 v/v, UV, vanillin stain)

### **N-benzyl-4-methyl-N-(3-morpholino-3-oxoprop-1-yn-1-yl)benzenesulfonamide (13)**

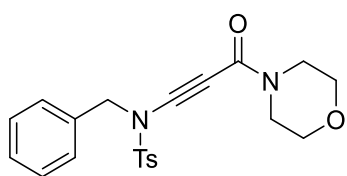

C<sub>21</sub>H<sub>22</sub>N<sub>2</sub>O<sub>4</sub>S  
MW : 398.48 g.mol<sup>-1</sup>  
Colorless oil  
54% (171.3 mg, 0.43 mmol)

**13** was prepared starting from **SI-c1** and **SI-b8**.

**<sup>1</sup>H NMR (CDCl<sub>3</sub>, 500 MHz):** δ = 7.73 (d, 2 H, *J* = 8.3 Hz), 7.36 – 7.23 (m, 7 H), 4.57 (s, 2 H), 3.66 – 3.48 (m, 6 H), 3.35 (dd, 2 H, *J* = 5.4 Hz, 4.5 Hz), 2.45 (s, 3 H) ppm.

**<sup>13</sup>C NMR (CDCl<sub>3</sub>, 125 MHz):** δ = 153.1 (C), 145.6 (C), 134.3 (C), 133.6 (C), 130.1 (2 CH), 129.9 (2 CH), 128.8 (2 CH), 128.7 (CH), 127.7 (2 CH), 86.1 (C), 67.8 (C), 66.8 (CH<sub>2</sub>), 68.4 (CH<sub>2</sub>), 55.1 (CH<sub>2</sub>), 46.6 (CH<sub>2</sub>), 41.6 (CH<sub>2</sub>), 21.7 (CH<sub>3</sub>) ppm.

**IR (neat):** ν = 2215, 1620, 1368, 1168, 1112 cm<sup>-1</sup>

**ESI-HRMS:** [M+Na]<sup>+</sup> calc: 421.1192; found: 421.1190

**R<sub>f</sub>:** 0.46 (Petroleum ether/EtOAc 50:50 v/v, UV, vanillin stain)

### **3-((N-benzyl-4-methylphenyl)sulfonamido)-N-methoxy-N-methylpropiolamide (14)**

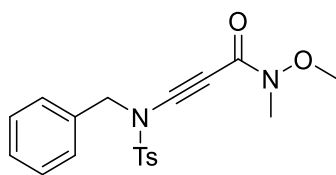

C<sub>19</sub>H<sub>20</sub>N<sub>2</sub>O<sub>4</sub>S  
MW : 372.44 g.mol<sup>-1</sup>  
White solid  
mp = 102 °C – 104 °C  
76% (227.2 mg, 0.61 mmol)

**14** was prepared starting from **SI-c1** and **SI-b6**.

**<sup>1</sup>H NMR (CDCl<sub>3</sub>, 500 MHz):** δ = 7.73 (d, 2 H, *J* = 8.2 Hz), 7.32 – 7.27 (m, 7 H), 4.61 (s, 2 H), 3.67 (s, 3 H), 3.18 (s, 3 H), 2.44 (s, 3 H) ppm.

**<sup>13</sup>C NMR (CDCl<sub>3</sub>, 125 MHz):** δ = 154.9 (C), 145.2 (C), 134.4 (C), 133.7 (C), 129.8 (2 CH), 128.6 (4 CH), 128.5 (CH), 127.6 (2 CH), 86.1 (C), 77.1 (C), 62.0 (CH<sub>3</sub>), 55.4 (CH<sub>2</sub>), 32.3 (CH<sub>3</sub>), 21.5 (CH<sub>3</sub>) ppm.

**IR (neat):** ν = 2218, 1638, 1370, 1171 cm<sup>-1</sup>

**ESI-HRMS:** [M+H]<sup>+</sup> calc: 373.1217; found: 373.1236

**R<sub>f</sub>:** 0.55 (Petroleum ether/EtOAc 50:50 v/v, UV, vanillin stain)

## Experimental procedure and characterization data for enesulfonamides 15/15' - 29/29'

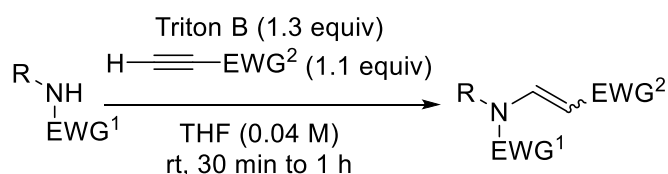

**General procedure:** The secondary amine **SI-c** (0.8 mmol, 1 equiv) was dissolved in THF (0.04 M). The alkyne **SI-a** (0.88 mmol, 1.1 equiv), followed by Triton B 40%wt in water (1.04 mmol, 1.3 equiv) were added at room temperature. Reaction was monitored by TLC and once judge completed by the full consumption of the starting material, the mixture was diluted with sat.  $\text{NH}_4\text{Cl}$  (10 mL). The aqueous layer was extracted with  $\text{Et}_2\text{O}$  (3 x 15 mL). The combined organic extracts were dried ( $\text{Na}_2\text{SO}_4$ ), concentrated under reduce pressure (15 mbar, 25 °C) and purified, if needed, by column chromatography on silica gel using a mixture of petroleum ether/ $\text{EtOAc}$  as eluent to afford the desired product.

**Detailed procedure for 25 on larger scale:** The secondary amine **SI-c1** (8.42 mmol, 2.2 g, 1 equiv) was dissolved in THF (0.04 M). The alkyne **SI-a10** (9.26 mmol, 1.11 g, 1.1 equiv), followed by Triton B 40%wt in water (10.94 mmol, 4.95 mL, 1.3 equiv) were added at room temperature. Reaction was monitored by TLC and once judge completed by the full consumption of the starting material, the mixture was diluted with sat.  $\text{NH}_4\text{Cl}$  (100 mL). The aqueous layer was extracted with  $\text{Et}_2\text{O}$  (3 x 50 mL). The combined organic extracts were dried ( $\text{Na}_2\text{SO}_4$ ), concentrated under reduce pressure (15 mbar, 25 °C) and purified, if needed, by column chromatography on silica gel using a mixture of petroleum ether/ $\text{EtOAc}$  as eluent to afford the desired product **25** as a yellow solid (100%, 8.42 mmol, 3.21 g)

### ethyl 3-((N-benzyl-4-methylphenyl)sulfonamido)acrylate (15/15')

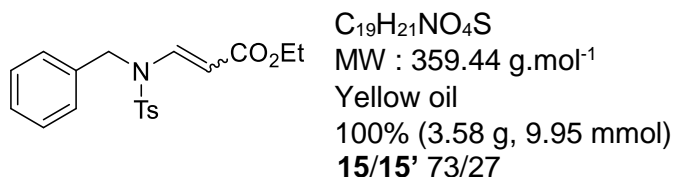

**15/15'** were prepared starting from **SI-c1** and commercially available ethyl propiolate, starting from 9.95 mmol of **SI-c1**.

**ESI-HRMS:**  $[\text{M}+\text{K}]^+$  calc: 398.0823; found: 398.0838

### **Full characterization of E isomer 15**

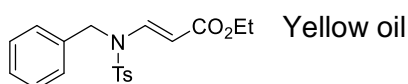

**<sup>1</sup>H NMR (CDCl<sub>3</sub>, 500 MHz):** δ = 8.16 (d, 1 H, J = 14.0 Hz), 7.71 (d, 2 H, J = 8.4 Hz), 7.35 – 7.27 (m, 5 H), 7.21 (dd, 2 H, J = 6.9 Hz, 2.0 Hz), 4.96 (d, 1 H, J = 14.0 Hz), 4.59 (s, 2 H), 4.12 (q, 2 H, J = 7.2 Hz), 2.44 (s, 3 H), 1.23 (t, 3 H, J = 7.2 Hz), ppm.

**<sup>13</sup>C NMR (CDCl<sub>3</sub>, 125 MHz):** δ = 166.8 (C), 144.8 (C), 141.5 (CH), 135.2 (C), 133.8 (C), 130.1 (2 CH), 128.7 (2 CH), 127.7 (CH), 127.1 (2 CH), 126.6 (2 CH), 99.7 (CH), 60.1 (CH<sub>2</sub>), 49.7 (CH<sub>2</sub>), 21.6 (CH<sub>3</sub>), 14.2 (CH<sub>3</sub>) ppm.

**IR (neat):** ν = 2980, 1707, 1624, 1355, 1154 cm<sup>-1</sup>

**R<sub>f</sub>:** 0.42 (Petroleum ether/EtOAc 80:20 v/v, UV, vanillin stain)

#### Full characterization of Z isomer 15'

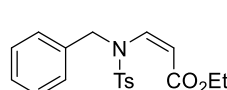

Colorless oil

**<sup>1</sup>H NMR (CDCl<sub>3</sub>, 300 MHz):** δ = 7.70 (d, 2 H, J = 8.2 Hz), 7.31 (d, 2 H, J = 8.2 Hz), 7.25 – 7.18 (m, 3 H), 7.13 (dd, 2 H, J = 6.8 Hz, 1.5 Hz), 6.93 (d, 1 H, J = 10.4 Hz), 5.16 (s, 2 H), 5.03 (d, 1 H, J = 10.4 Hz), 3.97 (q, 2 H, J = 7.2 Hz), 2.43 (s, 3 H), 1.12 (t, 3 H, J = 7.2 Hz) ppm.

**<sup>13</sup>C NMR (CDCl<sub>3</sub>, 125 MHz):** δ = 164.8 (C), 144.4 (C), 136.0 (C), 135.4 (CH), 135.2 (C), 129.9 (2 CH), 128.2 (2 CH), 127.5 (2 CH), 127.3 (CH), 127.0 (2 CH), 101.8 (CH), 60.1 (CH<sub>2</sub>), 50.6 (CH<sub>2</sub>), 21.6 (CH<sub>3</sub>), 14.0 (CH<sub>3</sub>) ppm.

**IR (neat):** ν = 2979, 1705, 1629, 1161, 1045 cm<sup>-1</sup>

**R<sub>f</sub>:** 0.46 (Petroleum ether/EtOAc 80:20 v/v, UV, vanillin stain)

#### ethyl 3-(benzyl(N,N-dimethylsulfamoyl)amino)acrylate (16/16')

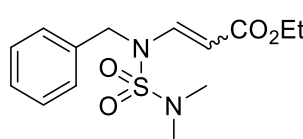

C<sub>14</sub>H<sub>20</sub>N<sub>2</sub>O<sub>4</sub>S

MW : 312.38 g.mol<sup>-1</sup>

88% (218.7 mg, 0.70 mmol)

16/16' 70/30

16/16' were prepared starting from SI-c3 and commercially available ethyl propiolate.

#### Full characterization of E isomer 16

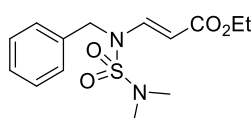

White solid

mp = 78 - 79 °C

**<sup>1</sup>H NMR (CDCl<sub>3</sub>, 500 MHz):** δ = 8.00 (d, 1 H, J = 14.1 Hz), 7.33 – 7.29 (m, 2 H), 7.27 – 7.21 (m, 3 H), 4.97 (d, 1 H, J = 14.1 Hz), 4.71 (s, 2 H), 4.09 (q, 2 H, J = 7.2 Hz), 2.78 (s, 6 H), 1.20 (t, 3 H, J = 7.2 Hz) ppm.

**<sup>13</sup>C NMR (CDCl<sub>3</sub>, 125 MHz):** δ = 167.3 (C), 143.2 (CH), 134.7 (C), 129.0 (2 CH), 128.0 (CH), 126.8 (2 CH), 97.7 (CH), 60.3 (CH<sub>2</sub>), 50.6 (CH<sub>2</sub>), 38.2 (2 CH<sub>3</sub>), 14.5 (CH<sub>3</sub>) ppm.

**IR (neat):** ν = 1704, 1622, 1372, 1148 cm<sup>-1</sup>

**ESI-HRMS:** [M+Na]<sup>+</sup> calc: 335.1036; found: 335.1024

**R<sub>f</sub>:** 0.45 (Petroleum ether/EtOAc 70:30 v/v, UV, vanillin stain)

### Full characterization of *Z* isomer 16'

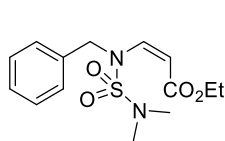

Colorless oil

**<sup>1</sup>H NMR (CDCl<sub>3</sub>, 500 MHz):**  $\delta$  = 7.30 – 7.18 (m, 5 H), 6.81 (d, 1 H,  $J$  = 10.1 Hz), 5.20 (s, 2 H), 4.99 (d, 1 H,  $J$  = 10.1 Hz), 4.08 (q, 2 H,  $J$  = 7.2 Hz), 2.85 (s, 6 H), 1.20 (t, 3 H,  $J$  = 7.2 Hz) ppm.

**<sup>13</sup>C NMR (CDCl<sub>3</sub>, 125 MHz):**  $\delta$  = 165.3 (C), 137.9 (CH), 135.8 (C), 128.5 (2 CH), 128.0 (2 CH), 127.7 (CH), 101.4 (CH), 60.3 (CH<sub>2</sub>), 52.0 (CH<sub>2</sub>), 38.4 (2 CH<sub>3</sub>), 14.4 (CH<sub>3</sub>) ppm.

**IR (neat):**  $\nu$  = 1707, 1626, 1362, 1150 cm<sup>-1</sup>

**R<sub>f</sub>:** 0.68 (Petroleum ether/EtOAc 70:30 v/v, UV, vanillin stain)

### ethyl 3-(*N*-benzylmethylsulfonamido)acrylate (17/17')

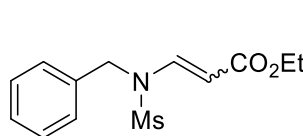

C<sub>13</sub>H<sub>17</sub>NO<sub>4</sub>S

MW : 283.34 g.mol<sup>-1</sup>

100% (226.7 mg, 0.80 mmol)

**17/17'** 72/28

**17/17'** were prepared starting from **SI-c6** and commercially available ethyl propiolate.

### Full characterization of *E* isomer 17

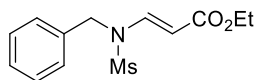

White solid

mp = 103 – 105 °C

**<sup>1</sup>H NMR (CDCl<sub>3</sub>, 500 MHz):**  $\delta$  = 8.00 (d, 1 H,  $J$  = 14.0 Hz), 7.39 – 7.34 (m, 2 H), 7.33 – 7.28 (m, 3 H), 5.16 (d, 1 H,  $J$  = 14.0 Hz), 4.79 (s, 2 H), 4.15 (q, 2 H,  $J$  = 7.2 Hz), 2.97 (s, 3 H), 1.25 (t, 3 H,  $J$  = 7.2 Hz) ppm.

**<sup>13</sup>C NMR (CDCl<sub>3</sub>, 125 MHz):**  $\delta$  = 166.9 (C), 141.5 (CH), 134.2 (C), 129.2 (2 CH), 128.3 (CH), 127.1 (2 CH), 100.0 (CH), 60.5 (CH<sub>2</sub>), 49.9 (CH<sub>2</sub>), 41.2 (CH<sub>3</sub>), 14.5 (CH<sub>3</sub>) ppm.

**IR (neat):**  $\nu$  = 1702, 1624, 1357, 1148 cm<sup>-1</sup>

**ESI-HRMS:** [M+Na]<sup>+</sup> calc: 306.0770; found: 306.0782

**R<sub>f</sub>:** 0.51 (Petroleum ether/EtOAc 60:40 v/v, UV, vanillin stain)

### Characteristic signal for *Z* isomer 17'

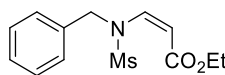

Colorless oil

**<sup>1</sup>H NMR (CDCl<sub>3</sub>, 500 MHz):**  $\delta$  = 6.77 (d, 1 H,  $J$  = 10.4 Hz), 5.26 (s, 2 H), 5.14 (d, 1 H,  $J$  = 10.4 Hz), 4.08 (q, 2 H,  $J$  = 7.2 Hz), 2.95 (s, 3 H), 1.20 (t, 3 H,  $J$  = 7.2 Hz) ppm.

**<sup>13</sup>C NMR (CDCl<sub>3</sub>, 125 MHz):**  $\delta$  = 165.2 (C), 136.1 (CH), 135.7 (C), 128.7 (CH), 128.0 (CH), 127.9 (CH), 103.2 (CH), 60.5 (CH<sub>2</sub>), 51.2 (CH<sub>2</sub>), 41.4 (CH<sub>3</sub>), 14.3 (CH<sub>3</sub>) ppm.

**R<sub>f</sub>:** 0.67 (Petroleum ether/EtOAc 60:40 v/v, UV, vanillin stain)



### ethyl 3-((*N*-benzyl-4-nitrophenyl)sulfonamido)acrylate (18/18')

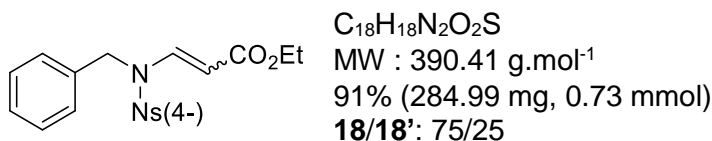

**18/18'** were prepared starting from **SI-c7** and commercially available ethyl propiolate.

#### **Full characterization of *E* isomer 18**

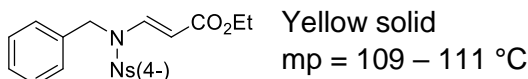

**<sup>1</sup>H NMR (CDCl<sub>3</sub>, 500 MHz):** δ = 8.33 (d, 2 H, *J* = 8.8 Hz), 8.12 (d, 1 H, *J* = 14.0 Hz), 7.96 (d, 2 H, *J* = 8.8 Hz), 7.31 – 7.26 (m, 3 H), 7.20 – 7.16 (m, 2 H), 5.13 (d, 1 H, *J* = 14.0 Hz), 4.69 (s, 2 H), 4.14 (q, 2 H, *J* = 7.2 Hz), 1.25 (t, 3 H, *J* = 7.2 Hz), ppm.

**<sup>13</sup>C NMR (CDCl<sub>3</sub>, 125 MHz):** δ = 166.6 (C), 150.6 (C), 144.0 (C), 140.8 (CH), 133.3 (C), 129.1 (2 CH), 128.6 (2 CH), 128.4 (CH), 127.0 (2 CH), 124.9 (2 CH), 101.8 (CH), 60.7 (CH<sub>2</sub>), 50.2 (CH<sub>2</sub>), 14.5 (CH<sub>3</sub>) ppm.

**IR (neat):** ν = 1704, 1624, 1531, 1348, 1151 cm<sup>-1</sup>

**ESI-HRMS:** [M+H]<sup>+</sup> calc: 391.0958; found: 391.0960

**R<sub>f</sub>:** 0.43 (Petroleum ether/EtOAc 80:20 v/v, UV, vanillin stain)

#### **Characteristic signal for *Z* isomer 18'**

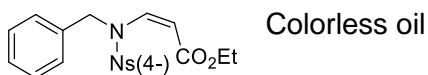

**<sup>1</sup>H NMR (CDCl<sub>3</sub>, 500 MHz):** δ = 7.97 (d, 2 H, *J* = 8.8 Hz), 6.85 (d, 1 H, *J* = 10.3 Hz), 5.22 (d, 1 H, *J* = 10.3 Hz), 5.16 (s, 2 H), 4.03 (q, 2 H, *J* = 7.2 Hz), 1.17 (t, 3 H, *J* = 7.2 Hz) ppm.

**<sup>13</sup>C NMR (CDCl<sub>3</sub>, 125 MHz):** δ = 164.7 (C), 150.4 (C), 145.0 (C), 134.8 (C), 133.3 (CH), 128.1 (CH), 124.7 (CH), 106.2 (CH), 60.7 (CH<sub>2</sub>), 51.7 (CH<sub>2</sub>), 14.3 (CH<sub>3</sub>) ppm.

**R<sub>f</sub>:** 0.59 (Petroleum ether/EtOAc 80:20 v/v, UV, vanillin stain)

### ethyl (*S*)-3-(2-oxo-4-phenyloxazolidin-3-yl)acrylate (19/19')

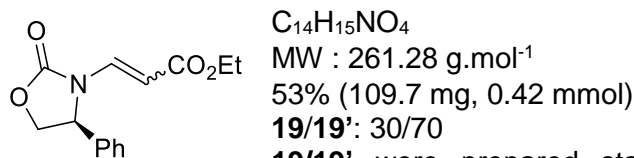

**19/19'** were prepared starting from commercially available (*S*)-4-phenyloxazolidin-2-one and commercially available ethyl propiolate.

### Full characterization of *E* isomer 19

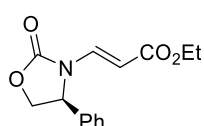

Colorless oil

**<sup>1</sup>H NMR (CDCl<sub>3</sub>, 500 MHz):** δ = 7.93 (d, 1 H, *J* = 14.4 Hz), 7.45 – 7.36 (m, 3 H), 7.25 – 7.21 (m, 2 H), 5.04 (dd, 1 H, *J* = 8.8 Hz, 5.1 Hz), 4.95 (d, 1 H, *J* = 14.4 Hz), 4.79 (t, 1 H, *J* = 8.9 Hz), 4.21 (dd, 1 H, *J* = 8.9 Hz, 5.0 Hz), 4.17 – 4.07 (m, 2 H), 1.23 (t, 3 H, *J* = 7.2 Hz), ppm.

**<sup>13</sup>C NMR (CDCl<sub>3</sub>, 125 MHz):** δ = 166.3 (C), 154.9 (C), 137.2 (CH), 136.6 (C), 129.6 (2 CH), 129.3 (CH), 125.7 (2 CH), 102.2 (CH), 70.9 (CH<sub>2</sub>), 60.2 (CH<sub>2</sub>), 58.2 (CH), 14.2 (CH<sub>3</sub>) ppm.

**IR (neat):** ν = 2982, 1774, 1704, 1300, 1205 cm<sup>-1</sup>

**ESI-HRMS:** [M+Na]<sup>+</sup> calc: 284.0893; found: 284.0893

**R<sub>f</sub>:** 0.69 (Petroleum ether/EtOAc 50:50 v/v, UV, ninhydrin stain)

### <sup>1</sup>H NMR characterization of *Z* isomer 19'

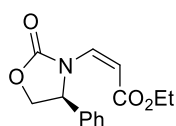

Colorless oil

Characterization data of **19'** match those of the literature.<sup>20</sup>

**<sup>1</sup>H NMR (CDCl<sub>3</sub>, 500 MHz):** δ = 7.36 – 7.29 (m, 3 H), 7.16 – 7.10 (m, 2 H), 6.91 (d, 1 H, *J* = 10.4 Hz), 6.09 (dd, 1 H, *J* = 9.1 Hz, 3.6 Hz), 5.09 (d, 1 H, *J* = 10.4 Hz), 4.75 (t, 1 H, *J* = 8.7 Hz), 4.20 (dd, 1 H, *J* = 8.7 Hz, 3.6 Hz), 4.06 – 3.91 (m, 2 H), 1.12 (t, 3 H, *J* = 7.2 Hz), ppm.

### ethyl 3-((*N*,4-dimethylphenyl)sulfonamido)acrylate (20/20')

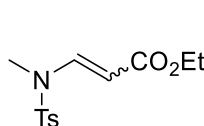

C<sub>13</sub>H<sub>17</sub>NO<sub>4</sub>S

MW : 283.34 g.mol<sup>-1</sup>

White oil

100% (226.7 mg, 0.80 mmol)

**20/20'**: 50/50

**20/20'** were prepared starting from commercially available *N*,4-dimethylbenzenesulfonamide and commercially available ethyl propiolate. Characterization data match of **20** and **20'** those of the literature.<sup>21</sup>

### <sup>1</sup>H NMR characterization of *E* isomer 20

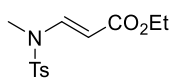

**<sup>1</sup>H NMR (CDCl<sub>3</sub>, 500 MHz):** δ = 8.14 (d, 1 H, *J* = 13.9 Hz), 7.68 (d, 2 H, *J* = 8.2 Hz), 7.33 (d, 2 H, *J* = 8.2 Hz), 5.03 (d, 1 H, *J* = 13.9 Hz), 4.18 (q, 2 H, *J* = 7.2 Hz), 2.94 (s, 3 H), 2.43 (s, 3 H), 1.28 (t, 3 H, *J* = 7.2 Hz) ppm.

<sup>20</sup> Pan, X.; Cai, Q.; Ma, D. *Org. Lett.* **2004**, 6, 1809.

<sup>21</sup> Hu, H.; Tian, J.; Liu, Y.; Liu, Y.; Shi, F.; Wang, X.; Kan, Y.; Wang, C. *J. Org. Chem.* **2015**, 80, 2842.

### ***<sup>1</sup>H NMR characterization of Z isomer 20'***

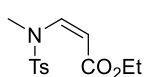

**<sup>1</sup>H NMR (CDCl<sub>3</sub>, 500 MHz):** δ = 7.68 (d, 2 H, *J* = 8.2 Hz), 7.33 (d, 2 H, *J* = 8.2 Hz), 7.05 (d, 1 H, *J* = 10.5 Hz), 5.04 (d, 1 H, *J* = 10.5 Hz), 4.08 (q, 2 H, *J* = 7.2 Hz), 3.23 (s, 3 H), 2.43 (s, 3 H), 1.283 (t, 3 H, *J* = 7.2 Hz) ppm.

### **ethyl 3-((N-cyclohexyl-4-methylphenyl)sulfonamido)acrylate (21/21')**

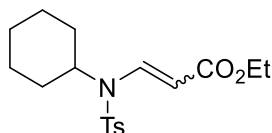

C<sub>18</sub>H<sub>25</sub>NO<sub>4</sub>S  
MW : 351.46 g.mol<sup>-1</sup>  
Colorless oil  
62% (174.3 mg, 0.49 mmol)  
**21/21'** 50/50

**21/21'** were prepared starting from **SI-c8** and commercially available ethyl propiolate. 30% of the sulfonamide **SI-c8** was recovered.

**IR (neat):** ν = 2933, 1708, 1619, 11357, 1157 cm<sup>-1</sup>

**ESI-HRMS:** [M+H]<sup>+</sup> calc: 352.1577; found: 352.1572

### ***Full characterization of E isomer 21***

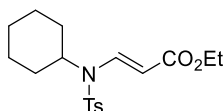

**<sup>1</sup>H NMR (CDCl<sub>3</sub>, 500 MHz):** δ = 7.87 (d, 1 H, *J* = 14.5 Hz), 7.72 (d, 2 H, *J* = 8.2 Hz), 7.31 (d, 2 H, *J* = 8.2 Hz), 5.50 (d, 1 H, *J* = 14.5 Hz), 4.18 (q, 2 H, *J* = 7.2 Hz), 3.90 (tt, 1 H, *J* = 12.2 Hz, 3.7 Hz), 2.43 (s, 3 H), 1.85 – 1.73 (m, 4 H), 1.65 – 1.58 (m, 1 H), 1.55 – 1.50 (m, 2 H), 1.43 (t, 1 H, *J* = 7.2 Hz), 1.26 – 1.23 (m, 1 H), 1.14 – 1.05 (m, 1 H), 1.29 (t, 3 H, *J* = 7.2 Hz) ppm.

**<sup>13</sup>C NMR (CDCl<sub>3</sub>, 125 MHz):** δ = 167.5 (C), 144.5 (C), 140.0 (CH), 136.3 (C), 129.9 (2 CH), 127.1 (2 CH), 99.3 (CH), 60.0 (CH<sub>2</sub>), 59.3 (CH), 29.6 (2 CH<sub>2</sub>), 26.0 (2 CH<sub>2</sub>), 24.9 (CH<sub>2</sub>), 21.5 (CH<sub>3</sub>), 14.3 (CH<sub>3</sub>) ppm.

**R<sub>f</sub>:** 0.36 (Petroleum ether/EtOAc 80:20 v/v, UV, vanillin stain)

### ***Characteristic signals of Z isomer 21'***

**<sup>1</sup>H NMR (CDCl<sub>3</sub>, 500 MHz):** δ = 7.68 (d, 2 H, *J* = 8.2 Hz), 7.27 (d, 2 H, *J* = 8.2 Hz), 6.30 (d, 1 H, *J* = 9.0 Hz), 5.68 (d, 1 H, *J* = 9.0 Hz), 4.18 (q, 2 H, *J* = 7.2 Hz), 3.79 (tt, 1 H, *J* = 12.2 Hz, 3.7 Hz), 2.41 (s, 3 H), 1.29 (t, 3 H, *J* = 7.2 Hz) ppm.

**<sup>13</sup>C NMR (CDCl<sub>3</sub>, 125 MHz):** δ = 164.9 (C), 144.3 (C), 138.2 (C), 133.5 (CH), 129.5 (2 CH), 126.9 (2 CH), 117.5 (CH), 60.9 (CH), 60.4 (CH<sub>2</sub>), 30.9 (2 CH<sub>2</sub>), 25.9 (2 CH<sub>2</sub>), 25.1 (CH<sub>2</sub>), 21.5 (CH<sub>3</sub>), 14.0 (CH<sub>3</sub>) ppm.

**R<sub>f</sub>:** 0.36 (Petroleum ether/EtOAc 80:20 v/v, UV, vanillin stain)

**ethyl (*E*)-3-((*N*-(2-acetamidoethyl)-4-methylphenyl)sulfonamido)acrylate (22)**

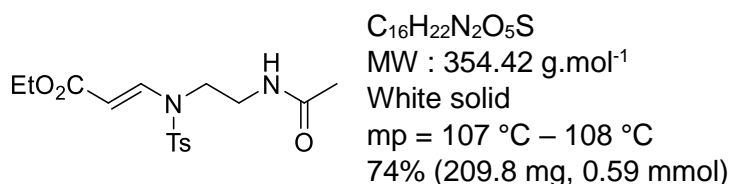

**22** was prepared starting from **SI-c9** and commercially available ethyl propiolate.

**<sup>1</sup>H NMR (CDCl<sub>3</sub>, 500 MHz):** δ = 8.07 (d, 1 H, *J* = 14.1 Hz), 7.67 (d, 2 H, *J* = 8.2 Hz), 7.33 (d, 2 H, *J* = 8.2 Hz), 6.05 (t, 1 H, *J* = 5.1 Hz), 5.27 (d, 1 H, *J* = 14.1 Hz), 4.18 (q, 2 H, *J* = 7.2 Hz), 3.51 – 3.41 (m, 4 H), 2.43 (s, 3 H), 1.99 (s, 3 H), 1.27 (t, 3 H, *J* = 7.2 Hz) ppm.

**<sup>13</sup>C NMR (CDCl<sub>3</sub>, 125 MHz):** δ = 170.9 (C), 166.9 (C), 145.0 (C), 141.3 (CH), 134.5 (C), 130.2 (2 CH), 127.1 (2 CH), 98.7 (CH), 60.2 (CH<sub>2</sub>), 44.7 (CH<sub>2</sub>), 36.7 (CH<sub>2</sub>), 23.0 (CH<sub>3</sub>), 21.6 (CH<sub>3</sub>), 14.3 (CH<sub>3</sub>) ppm.

**IR (neat):** ν = 3373, 1709, 1621, 1523, 1366, 1154 cm<sup>-1</sup>

**ESI-HRMS:** [M+Na]<sup>+</sup> calc: 377.1142; found: 377.1145

**R<sub>f</sub>:** 0.31 (CH<sub>2</sub>Cl<sub>2</sub>/acetone 80:20 v/v, UV, ninhydrin stain)

**(*E*)-*N*,4-dimethyl-*N*-(3-oxo-3-phenylprop-1-en-1-yl)benzenesulfonamide (23)**

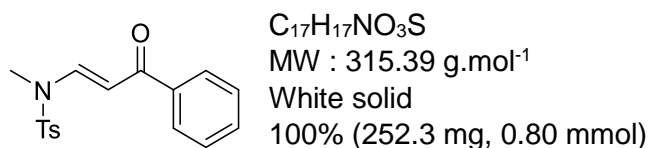

**23** was prepared starting from commercially available *N*,4-dimethylbenzenesulfonamide and **SI-a2**. Characterization data match those of the literature.<sup>22</sup>

**<sup>1</sup>H NMR (CDCl<sub>3</sub>, 500 MHz):** δ = 8.35 (d, 1 H, *J* = 13.5 Hz), 7.88 (d, 2 H, *J* = 8.2 Hz), 7.72 (d, 2 H, *J* = 8.2 Hz), 7.56 – 7.51 (m, 1 H), 7.45 (t, 2 H, *J* = 7.6 Hz), 7.34 (d, 2 H, *J* = 8.4 Hz), 6.13 (d, 1 H, *J* = 13.5 Hz), 3.10 (s, 3 H), 2.43 (s, 3 H) ppm.

**(*E*)-*N*-benzyl-4-methyl-*N*-(3-(naphthalen-2-yl)-3-oxoprop-1-en-1-yl)benzenesulfonamide (24)**

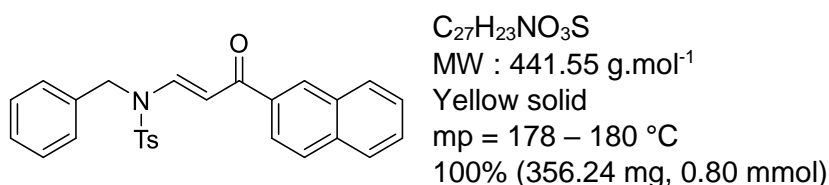

**24** was prepared starting from **SI-c1** and **SI-a9**.

<sup>22</sup> Liang, X.; Huang, X.; Xiong, M.; Shen, K.; Pan, Y. *Chem. Commun.* **2018**, *54*, 8403.

**<sup>1</sup>H NMR (CDCl<sub>3</sub>, 500 MHz):** δ = 8.38 (d, 1 H, *J* = 13.6 Hz), 8.03 (s, b, 1 H), 7.86 – 7.80 (m, 4 H), 7.77 (d, 2 H, *J* = 8.2 Hz), 7.59 – 7.47 (m, 2 H), 7.42 – 7.28 (m, 7 H), 6.24 (d, 1 H, *J* = 13.6 Hz), 4.80 (s, 2 H), 2.44 (s, 3 H) ppm.

**<sup>13</sup>C NMR (CDCl<sub>3</sub>, 125 MHz):** δ = 189.3 (C), 145.2 (C), 142.4 (CH), 135.9 (C), 135.4 (C), 135.4 (C), 134.4 (C), 132.6 (C), 130.4 (2 CH), 129.5 (CH), 129.4 (CH), 129.1 (2 CH), 128.5 (CH), 128.3 (CH), 128.2 (CH), 127.9 (CH), 127.5 (2 CH), 127.0 (2 CH), 126.8 (CH), 124.3 (CH), 105.0 (CH), 50.5 (CH<sub>2</sub>), 21.6 (CH<sub>3</sub>) ppm.

**IR (neat):** ν = 1658, 1580, 1365, 1166 cm<sup>-1</sup>

**ESI-HRMS:** [M+H]<sup>+</sup> calc: 442.1471; found: 442.1485

**R<sub>f</sub>:** 0.58 (Petroleum ether/EtOAc 70:30 v/v, UV, vanillin stain)

**(E)-N-benzyl-N-(3-(furan-2-yl)-3-oxoprop-1-en-1-yl)-4-methylbenzenesulfonamide (25)**

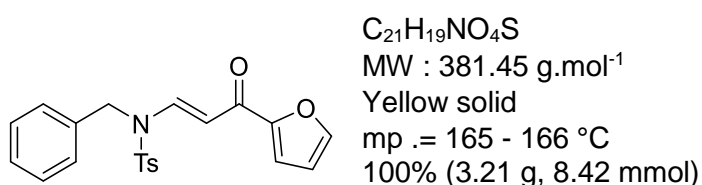

**25** was prepared starting from **SI-c1** and **SI-a10**, starting from 8.42 mmol of **SI-c1**.

**<sup>1</sup>H NMR (CDCl<sub>3</sub>, 500 MHz):** δ = 8.38 (d, 1 H, *J* = 13.9 Hz), 7.73 (d, 2 H, *J* = 8.3 Hz), 7.49 (dt, 1 H, *J* = 1.4 Hz, 0.4 Hz), 7.34 – 7.29 (m, 4 H), 7.29 – 7.26 (m, 3 H), 7.00 (dd, 1 H, *J* = 3.5 Hz, 0.4 Hz), 6.46 (dd, 1 H, *J* = 3.5 Hz, 1.4 Hz), 6.03 (d, 1 H, *J* = 13.9 Hz), 4.73 (s, 2 H), 2.43 (s, 3 H) ppm.

**<sup>13</sup>C NMR (CDCl<sub>3</sub>, 125 MHz):** δ = 177.3 (C), 153.4 (C), 145.7 (CH), 144.9 (C), 141.9 (CH), 135.1 (C), 134.0 (C), 130.1 (2 CH), 128.8 (2 CH), 127.8 (CH), 127.2 (2 CH), 126.7 (2 CH), 116.2 (CH), 112.2 (CH), 103.7 (CH), 50.1(CH<sub>2</sub>), 21.6 (CH<sub>3</sub>) ppm.

**IR (neat):** ν = 1649, 1588, 1359, 1161 cm<sup>-1</sup>

**ESI-HRMS:** [M+H]<sup>+</sup> calc: 382.1108; found: 382.1097

**R<sub>f</sub>:** 0.36 (Petroleum ether/EtOAc 70:30 v/v, UV, vanillin stain)

**N-benzyl-4-methyl-N-((1E,4E)-3-oxo-5-phenylpenta-1,4-dien-1-yl)benzenesulfonamide (26)**

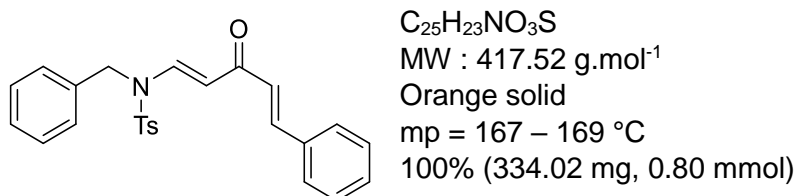

**26** was prepared starting from **SI-c1** and **SI-a5**.

**<sup>1</sup>H NMR (CDCl<sub>3</sub>, 300 MHz):** δ = 8.29 (d, 1 H, *J* = 13.8 Hz), 7.74 (d, 2 H, *J* = 8.2 Hz), 7.52 – 7.42 (m, 3 H), 7.39 – 7.29 (m, 8 H), 7.25 – 7.22 (m, 2 H), 6.73 (d, 1 H, *J* = 15.9 Hz), 5.64 (d, 1 H, *J* = 13.8 Hz), 4.70 (s, 2 H), 2.44 (s, 3 H) ppm.

**<sup>13</sup>C NMR (CDCl<sub>3</sub>, 125 MHz):** δ = 187.7 (C), 145.2 (C), 142.4 (CH), 141.6 (CH), 135.4 (C), 134.9 (C), 134.2 (C), 130.4 (3 CH), 129.0 (4 CH), 128.4 (2 CH), 128.1 (CH), 127.5 (2 CH), 126.9 (2 CH), 125.9 (CH), 108.2 (CH), 50.2 (CH<sub>2</sub>), 21.8 (CH<sub>3</sub>) ppm.

**IR (neat):** ν = 2924, 1612, 1576, 1365, 1166 cm<sup>-1</sup>

**ESI-HRMS:** [M+H]<sup>+</sup> calc: 418.1471; found: 418.1480

**R<sub>f</sub>:** 0.27 (Petroleum ether/EtOAc 80:20 v/v, UV, vanillin stain)

**N-benzyl-4-methyl-N-((4E)-3-oxoocta-1,4-dien-1-yl)benzenesulfonamide (27)**

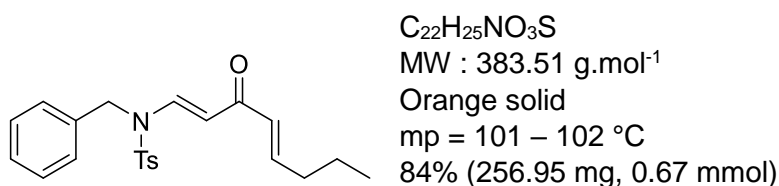

**27** was prepared starting from **SI-c1** and **SI-a11**.

**<sup>1</sup>H NMR (CDCl<sub>3</sub>, 500 MHz):** δ = 8.19 (d, 1 H, *J* = 14.0 Hz), 7.71 (d, 2 H, *J* = 8.2 Hz), 7.32 – 7.25 (m, 5 H), 7.22 (d, 2 H, *J* = 8.2 Hz), 6.69 (dt, 1 H, *J* = 15.6 Hz, 7.3 Hz), 6.12 (dt, 1 H, *J* = 15.6 Hz, 1.4 Hz), 5.52 (d, 1 H, *J* = 14.0 Hz), 4.65 (s, 2 H), 2.43 (s, 3 H), 2.14 (qd, 2 H, *J* = 7.3 Hz, 1.4 Hz), 1.48 – 1.40 (m, 2 H), 0.90 (t, 3 H, *J* = 7.3 Hz) ppm.

**<sup>13</sup>C NMR (CDCl<sub>3</sub>, 125 MHz):** δ = 118.1 (C), 147.1 (CH), 145.1 (C), 141.3 (CH), 135.4 (C), 134.2 (C), 130.4 (2 CH), 129.6 (CH), 129.0 (2 CH), 128.0 (CH), 127.4 (2 CH), 126.9 (2 CH), 107.7 (CH), 50.1 (CH<sub>2</sub>), 34.7 (CH<sub>2</sub>), 21.8 (CH<sub>3</sub>), 21.6 (CH<sub>2</sub>), 13.9 (CH<sub>3</sub>) ppm.

**IR (neat):** ν = 1653, 1564, 1291, 1160 cm<sup>-1</sup>

**ESI-HRMS:** [M+H]<sup>+</sup> calc: 384.1628; found: 384.1642

**R<sub>f</sub>:** 0.41 (Petroleum ether/EtOAc 80:20 v/v, UV, vanillin stain)

**N-benzyl-4-methyl-N-(2-tosylvinyl)benzenesulfonamide (28/28')**

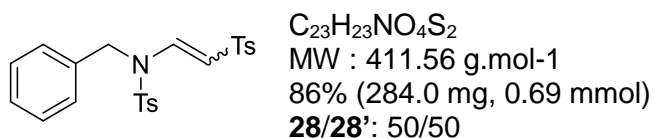

**28/28'** were prepared starting from **SI-c1** and **SI-a12**.

**ESI-HRMS:** [M+Na]<sup>+</sup> calc: 464.0961; found: 464.0934

**IR (neat):** ν = 2924, 1608, 1360, 1290, 1166, 1141, 1083 cm<sup>-1</sup>

### Full characterization of *E* isomer 28

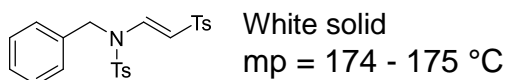

**<sup>1</sup>H NMR (CDCl<sub>3</sub>, 500 MHz):** δ = 8.15 (d, 1 H, *J* = 13.6 Hz), 7.71 (d, 2 H, *J* = 8.3 Hz), 7.55 (d, 2 H, *J* = 8.2 Hz), 7.34 (d, 2 H, *J* = 8.3 Hz), 7.24 – 7.19 (m, 5 H), 7.11 – 7.07 (m, 2 H), 5.41 (d, 1 H, *J* = 13.6 Hz), 4.57 (s, 2 H), 2.46 (s, 3 H), 2.39 (s, 3 H) ppm.

**<sup>13</sup>C NMR (CDCl<sub>3</sub>, 125 MHz):** δ = 145.3 (C), 143.5 (C), 140.4 (CH), 139.0 (C), 134.7 (C), 133.1 (C), 130.3 (2 CH), 129.6 (2 CH), 128.8 (2 CH), 127.9 (CH), 127.2 (2 CH), 126.6 (2 CH), 126.5 (2 CH), 109.0 (CH), 50.2 (CH<sub>2</sub>), 21.6 (CH<sub>3</sub>), 21.5 (CH<sub>3</sub>) ppm.

R<sub>f</sub>: 0.45 (Petroleum ether/EtOAc 70:30 v/v, UV, vanillin stain)

### Full characterization of *Z* isomer 28'

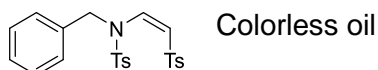

**<sup>1</sup>H NMR (CDCl<sub>3</sub>, 500 MHz):** δ = 7.62 (d, 2 H, *J* = 8.2 Hz), 7.40 (d, 2 H, *J* = 8.2 Hz), 7.29 (d, 2 H, *J* = 8.2 Hz), 7.22 – 7.17 (m, 3 H), 7.16 – 7.10 (m, 4 H), 7.07 (d, 1 H, *J* = 10.9 Hz), 5.48 (d, 1 H, *J* = 10.9 Hz), 5.29 (s, 2 H), 2.44 (s, 3 H), 2.36 (s, 3 H) ppm.

**<sup>13</sup>C NMR (CDCl<sub>3</sub>, 125 MHz):** δ = 144.8 (C), 143.9 (C), 138.6 (C), 135.6 (C), 135.3 (C), 134.2 (CH), 129.9 (2 CH), 129.5 (2 CH), 128.2 (2 CH), 127.3 (2 CH), 127.2 (CH), 127.1 (2 CH), 126.8 (2 CH), 110.4 (CH), 52.6 (CH<sub>2</sub>), 21.6 (CH<sub>3</sub>), 21.5 (CH<sub>3</sub>) ppm.

R<sub>f</sub>: 0.45 (Petroleum ether/EtOAc 70:30 v/v, UV, vanillin stain)

### 3-((*N*-benzyl-4-methylphenyl)sulfonamido)-*N,N*-diethylacrylamide (29/29')

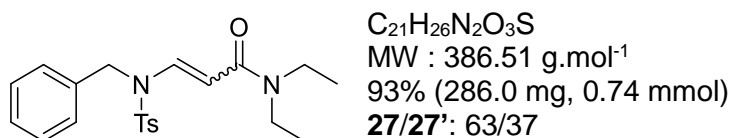

29/29' were prepared starting from **SI-c1** and **SI-a7**.

### Full characterization of *E* isomer 29

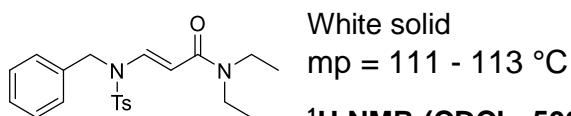

**<sup>1</sup>H NMR (CDCl<sub>3</sub>, 500 MHz):** δ = 8.05 (d, 1 H, *J* = 13.5 Hz), 7.72 (d, 2 H, *J* = 8.3 Hz), 7.31 – 7.25 (m, 4 H), 7.24 – 7.20 (m, 3 H), 5.22 (d, 1 H, *J* = 13.5 Hz), 4.60 (s, 2 H), 3.29 (q, 2 H, *J* = 7.2 Hz), 3.14 (q, 2 H, *J* = 7.2 Hz), 2.40 (s, 3 H), 1.02 (t, 3 H, *J* = 7.2 Hz), 0.76 (t, 3 H, *J* = 7.2 Hz) ppm.

**<sup>13</sup>C NMR (CDCl<sub>3</sub>, 125 MHz):** δ = 165.2 (C), 144.4 (C), 139.2 (CH), 135.5 (C), 134.7 (C), 130.0 (2 CH), 128.7 (2 CH), 127.7 (CH), 127.1 (2 CH), 126.5 (2 CH), 100.5 (CH), 50.3 (CH<sub>2</sub>), 42.0 (CH<sub>2</sub>), 40.7 (CH<sub>2</sub>), 21.5 (CH<sub>3</sub>), 14.3 (CH<sub>3</sub>), 13.2 (CH<sub>3</sub>) ppm.

**IR (neat):** ν = 2976, 1651, 1594, 1360, 1167 cm<sup>-1</sup>

**ESI-HRMS:** [M+Na]<sup>+</sup> calc: 409.1556; found: 409.1538

**R<sub>f</sub>:** 0.21 (Petroleum ether/EtOAc 60:40 v/v, UV, vanillin stain)

**Full characterization of Z isomer 29'**

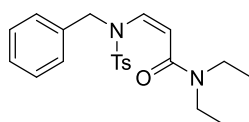

Yellow oil

**<sup>1</sup>H NMR (CDCl<sub>3</sub>, 500 MHz):** δ = 7.75 (d, 2 H, *J* = 8.3 Hz), 7.32 (d, 2 H, *J* = 8.3 Hz), 7.25 – 7.13 (m, 5 H), 6.90 (d, 1 H, *J* = 10.7 Hz), 5.06 (d, 1 H, *J* = 10.7 Hz), 5.00 (s, 2 H), 3.14 (q, 2 H, *J* = 7.2 Hz), 2.66 (q, 2 H, *J* = 7.2 Hz), 2.41 (s, 3 H), 0.97 (t, 3 H, *J* = 7.2 Hz), 0.76 (t, 3 H, *J* = 7.2 Hz) ppm.

**<sup>13</sup>C NMR (CDCl<sub>3</sub>, 125 MHz):** δ = 165.3 (C), 144.1 (C), 136.3 (C), 135.8 (C), 130.2 (CH), 129.9 (2 CH), 128.0 (2 CH), 127.0 (CH), 127.0 (2 CH), 126.8 (2 CH), 103.6 (CH), 49.3 (CH<sub>2</sub>), 42.7 (CH<sub>2</sub>), 39.7 (CH<sub>2</sub>), 21.5 (CH<sub>3</sub>), 13.2 (CH<sub>3</sub>), 12.9 (CH<sub>3</sub>) ppm.

**IR (neat):** ν = 2975, 1641, 1346, 1164 cm<sup>-1</sup>

**R<sub>f</sub>:** 0.43 (Petroleum ether/EtOAc 60:40 v/v, UV, vanillin stain)



## Experimental procedure for isomerization

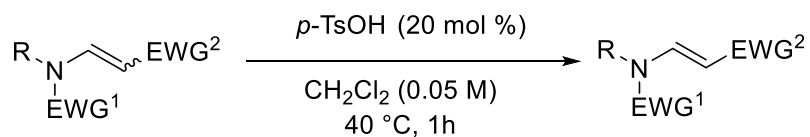

**General procedure:** The mixture of *E/Z* enesulfonamide or the *Z* enamide (0.5 mmol, 1 equiv) was dissolved in CH<sub>2</sub>Cl<sub>2</sub> (0.05 M). Para-toluenesulfonic acid (0.1 mmol, 20 mol %) was then added and the reaction was heated to 40 °C. Reaction was monitored by TLC and once judge completed by the full consumption of the starting material, the mixture was diluted with sat. NaHCO<sub>3</sub> (10 mL). The aqueous layer was extracted with AcOEt (3 x 15 mL). The combined organic extracts were dried (Na<sub>2</sub>SO<sub>4</sub>), concentrated under reduce pressure (15 mbar, 25 °C) and purified by column chromatography on silica gel using a mixture of petroleum ether/EtOAc as eluent to afford the desired product.

**Detailed procedure for 29 on 1 mmol:** The The *Z* enamide **29'** (1 mmol, 386.5 mg, 1 equiv) was dissolved in CH<sub>2</sub>Cl<sub>2</sub> (0.05 M). Para-toluenesulfonic acid (0.2 mmol, 35 mg, 20 mol %) was then added and the reaction was heated to 40 °C. Reaction was monitored by TLC and once judge completed by the full consumption of the starting material, the mixture was diluted with sat. NaHCO<sub>3</sub> (10 mL). The aqueous layer was extracted with AcOEt (3 x 15 mL). The combined organic extracts were dried (Na<sub>2</sub>SO<sub>4</sub>), concentrated under reduce pressure (15 mbar, 25 °C) and purified by column chromatography on silica gel using a mixture of petroleum ether/EtOAc as eluent to afford **29** as a white solid (85%, 0.85 mmol, 328.5 mg)

# <sup>1</sup>H and <sup>13</sup>C spectra for SI-a11

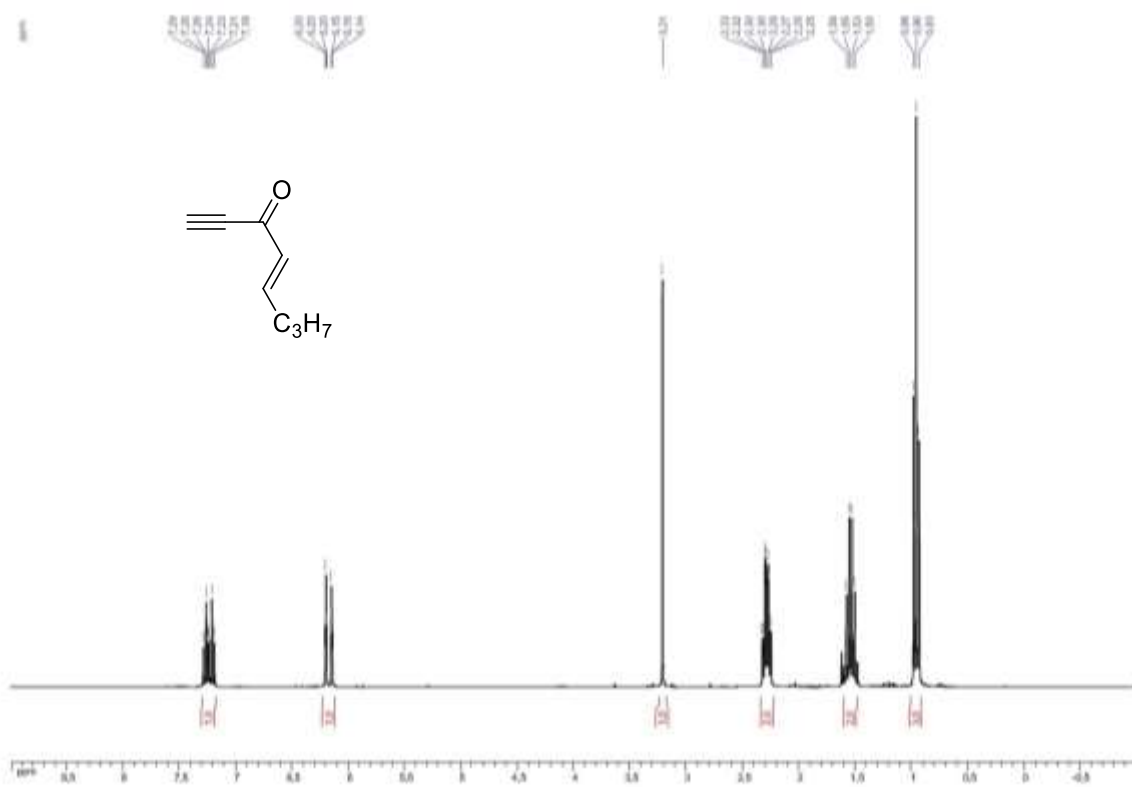

<sup>1</sup>H NMR (CDCl<sub>3</sub>, 500 MHz) of SI-a11

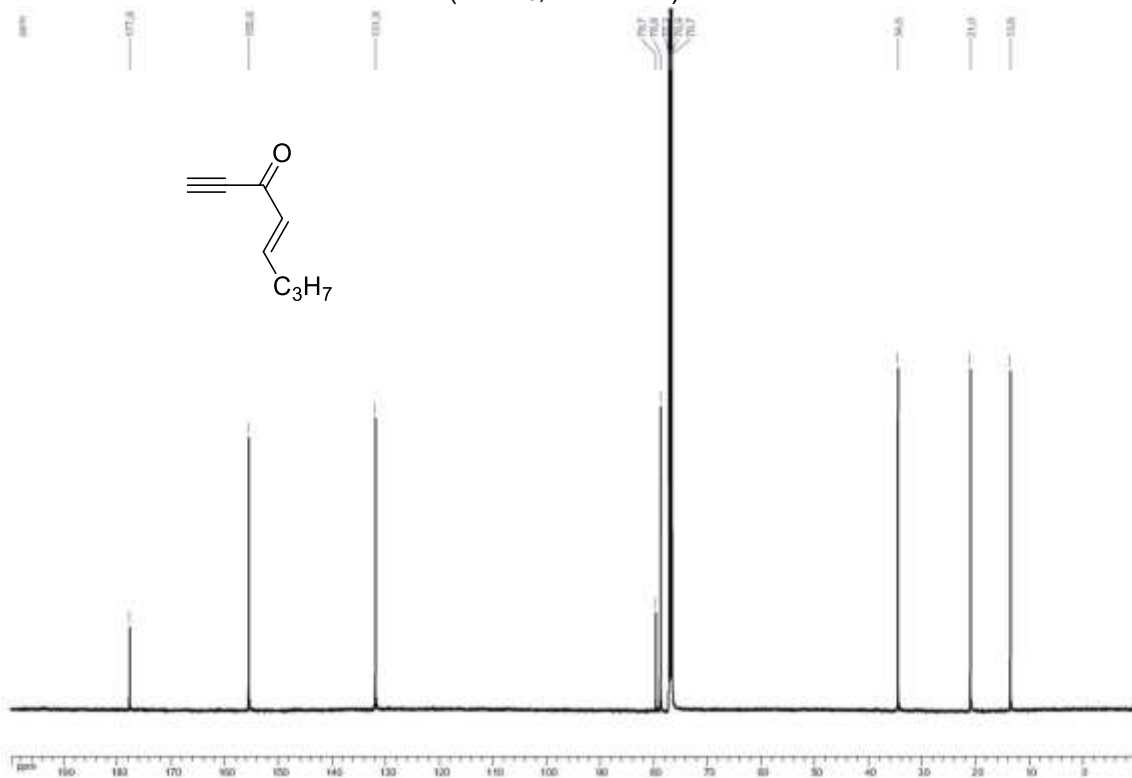

<sup>13</sup>C NMR (CDCl<sub>3</sub>, 125 MHz) of SI-a11

# <sup>1</sup>H and <sup>13</sup>C spectra for SI-b

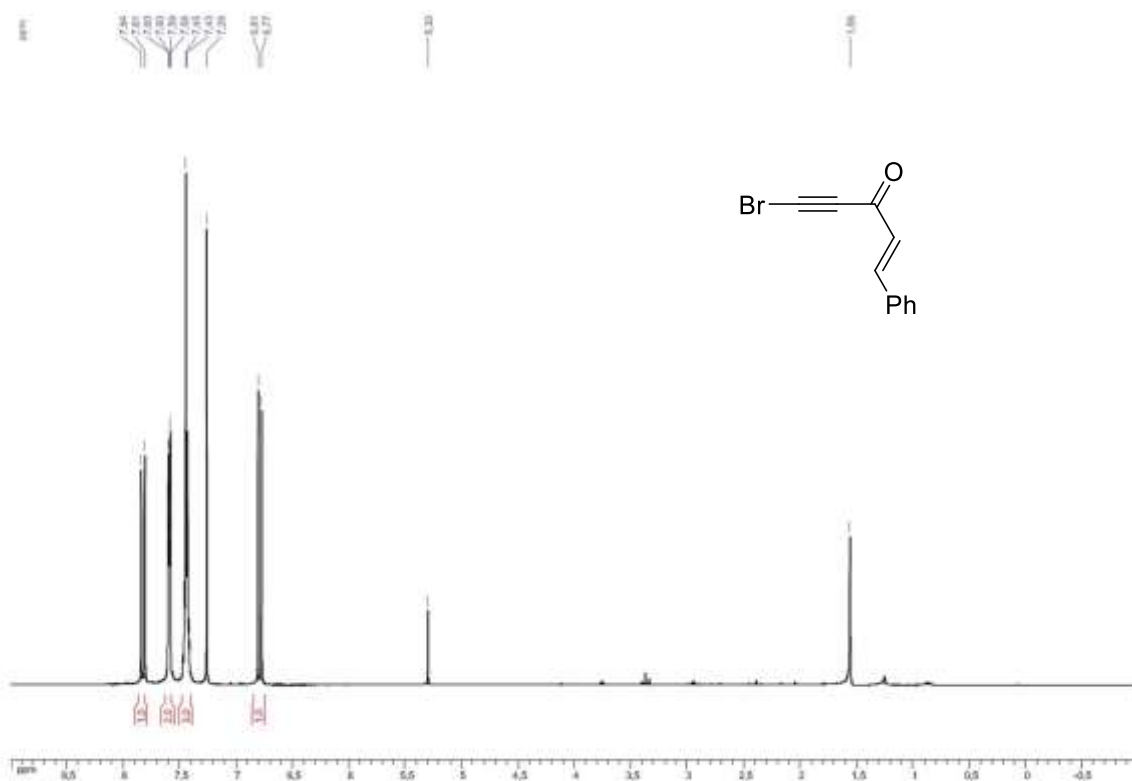

<sup>1</sup>H NMR (CDCl<sub>3</sub>, 500 MHz) of SI-b5

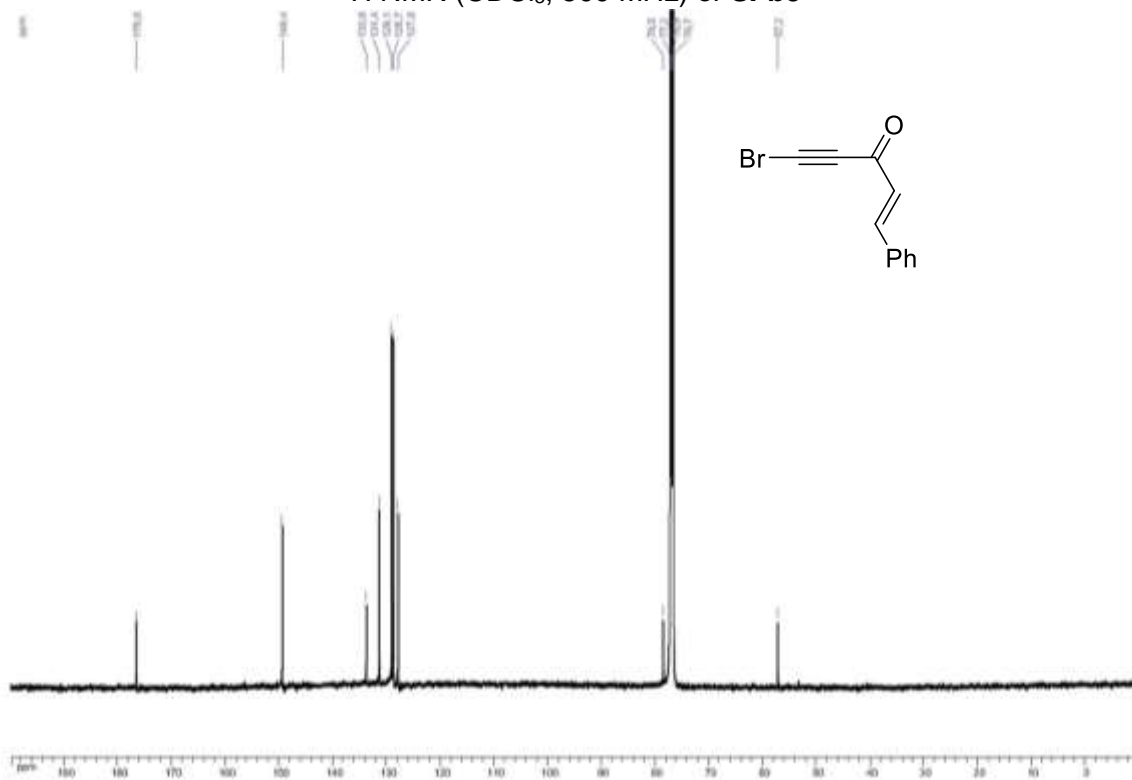

<sup>13</sup>C NMR (CDCl<sub>3</sub>, 125 MHz) of SI-b5

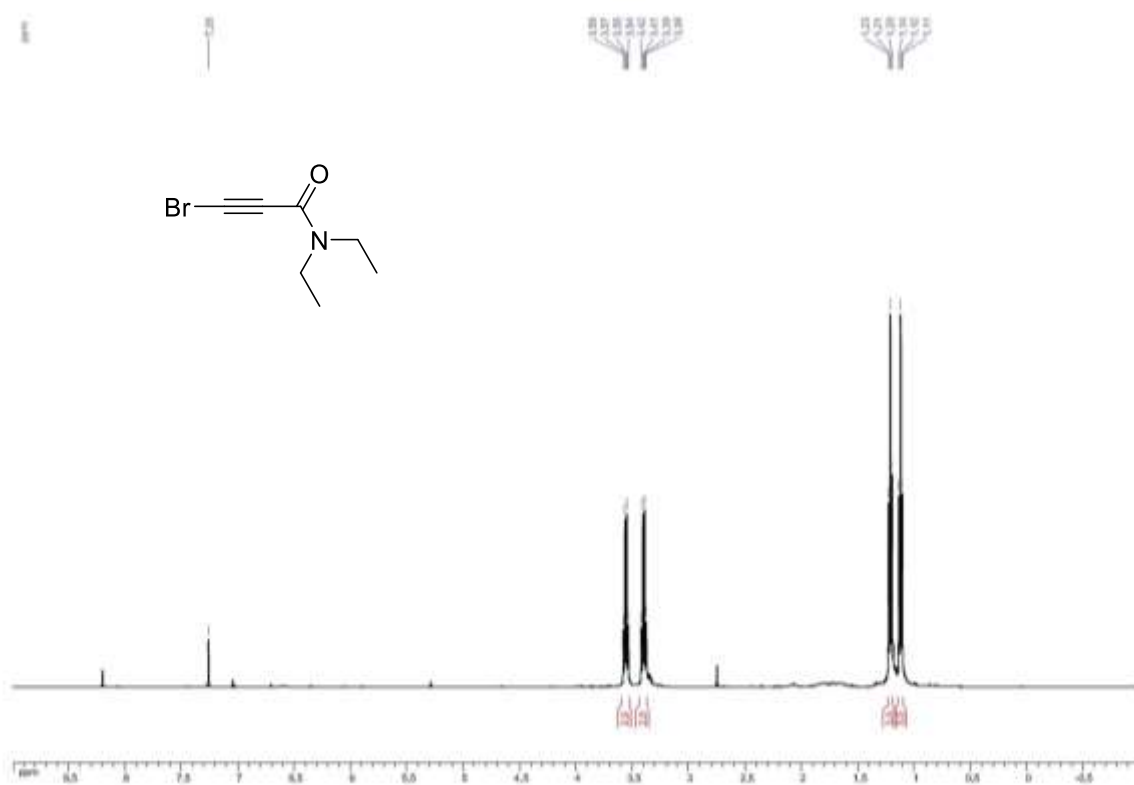

<sup>1</sup>H NMR (CDCl<sub>3</sub>, 500 MHz) of **SI-b7**

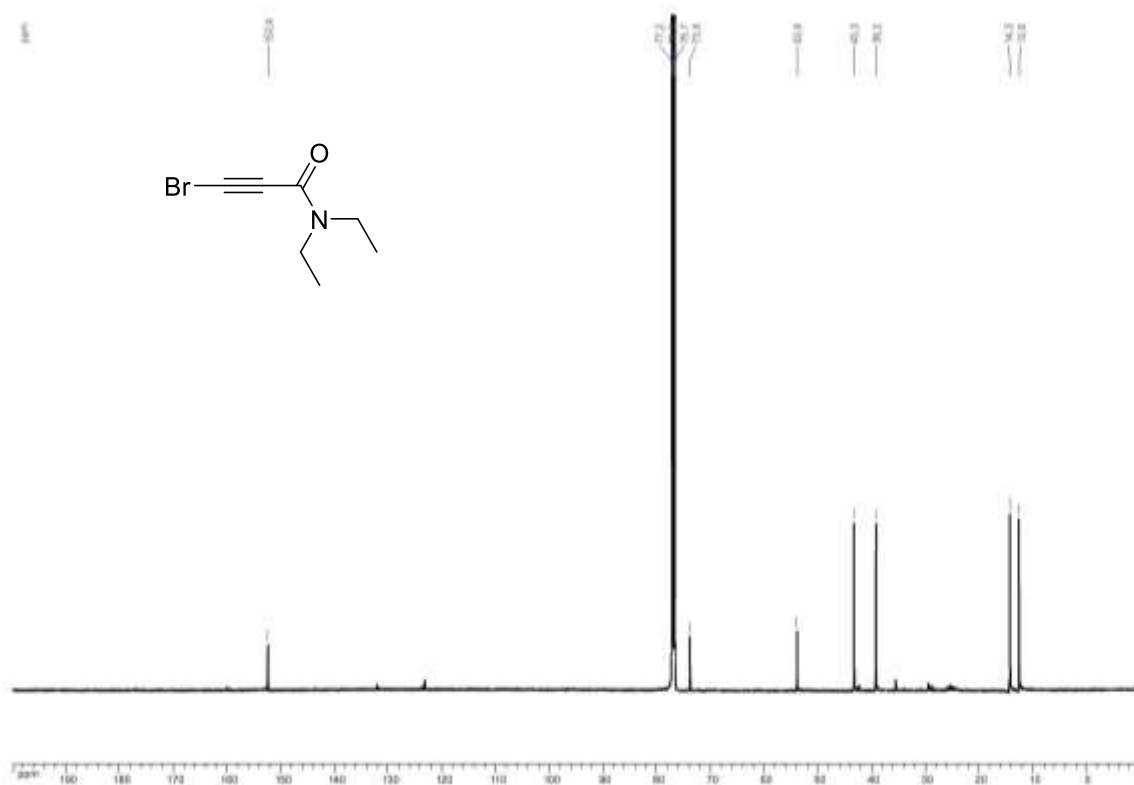

<sup>13</sup>C NMR (CDCl<sub>3</sub>, 125 MHz) of **SI-b7**

# <sup>1</sup>H and <sup>13</sup>C spectra for 3

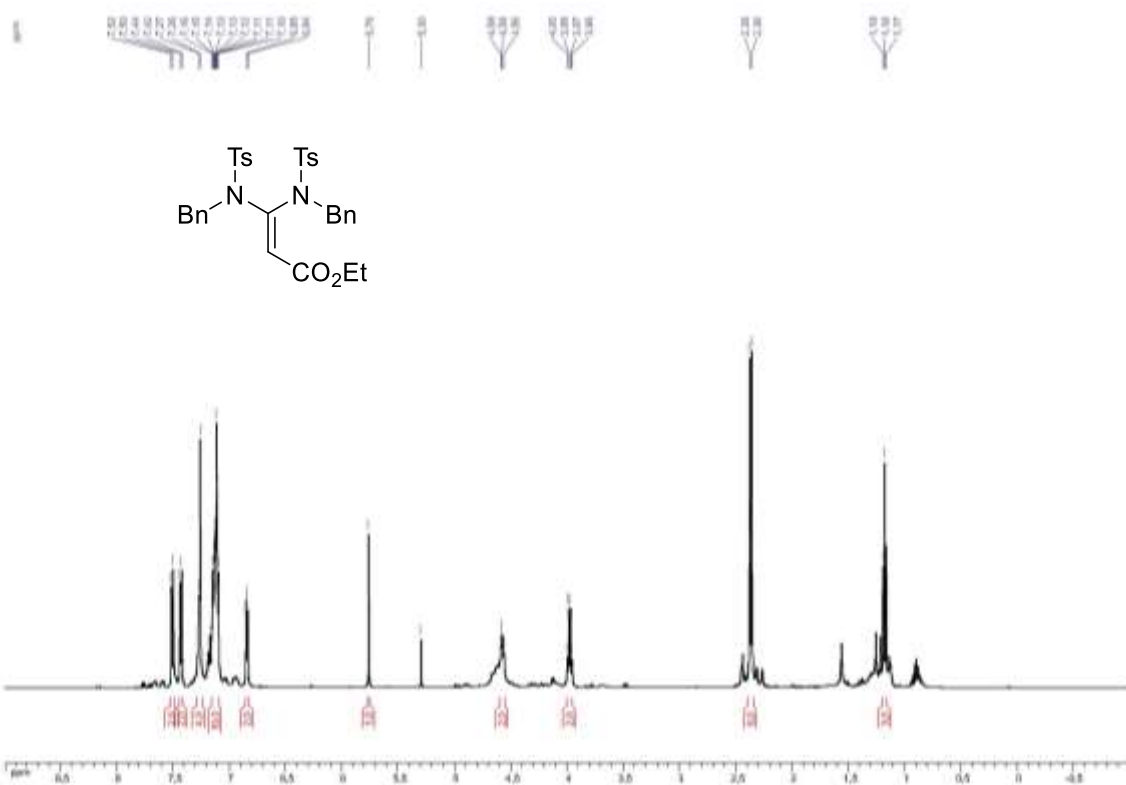

<sup>1</sup>H NMR (CDCl<sub>3</sub>, 500 MHz) of 3

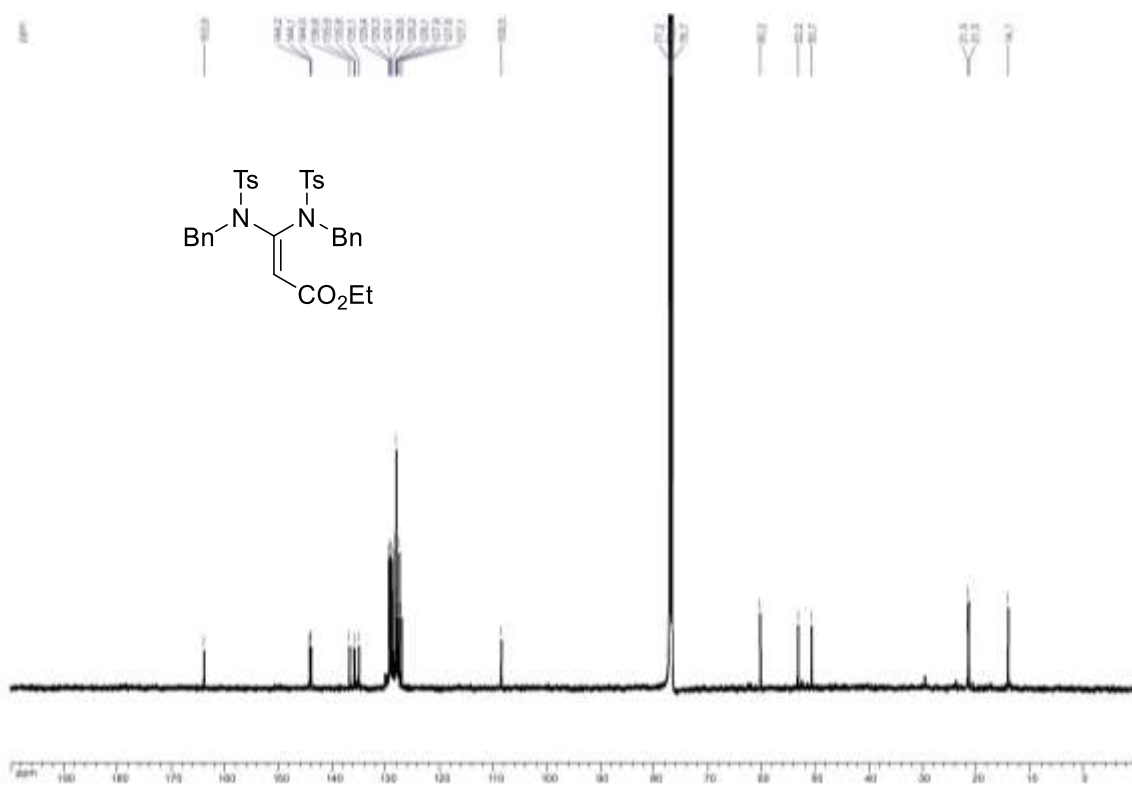

<sup>13</sup>C NMR (CDCl<sub>3</sub>, 125 MHz) of 3

# <sup>1</sup>H and <sup>13</sup>C spectra for ynesulfonamides 4 - 14

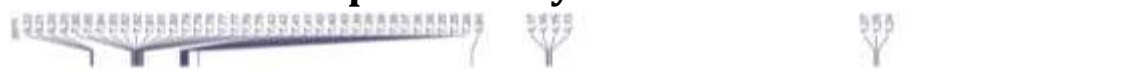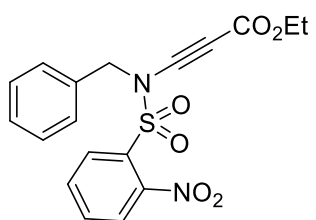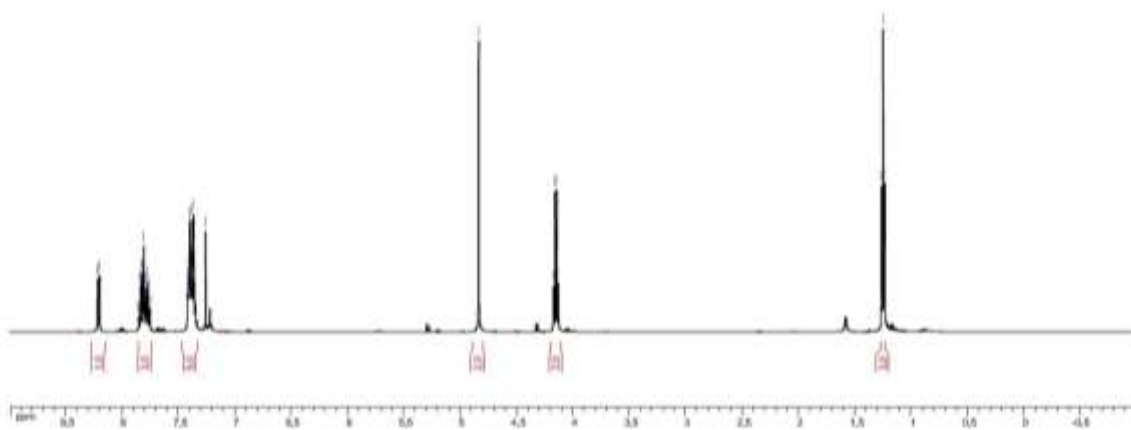

<sup>1</sup>H NMR (CDCl<sub>3</sub>, 500 MHz) of 4

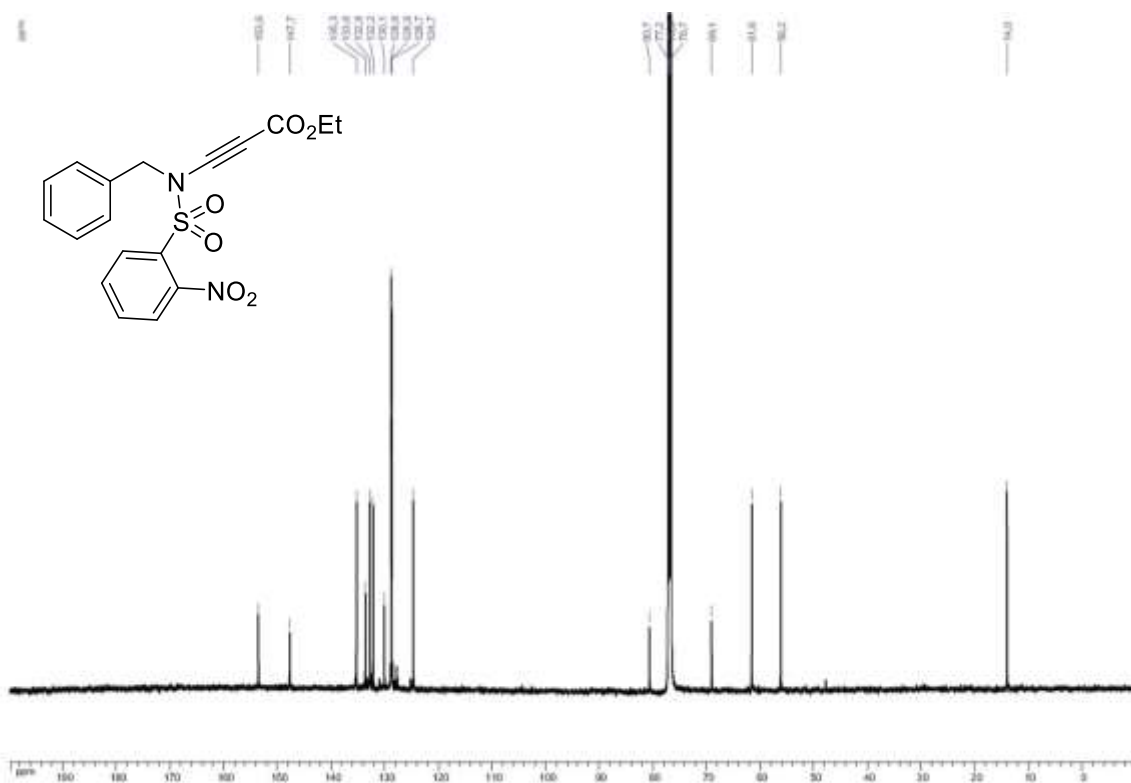

<sup>13</sup>C NMR (CDCl<sub>3</sub>, 125 MHz) of 4

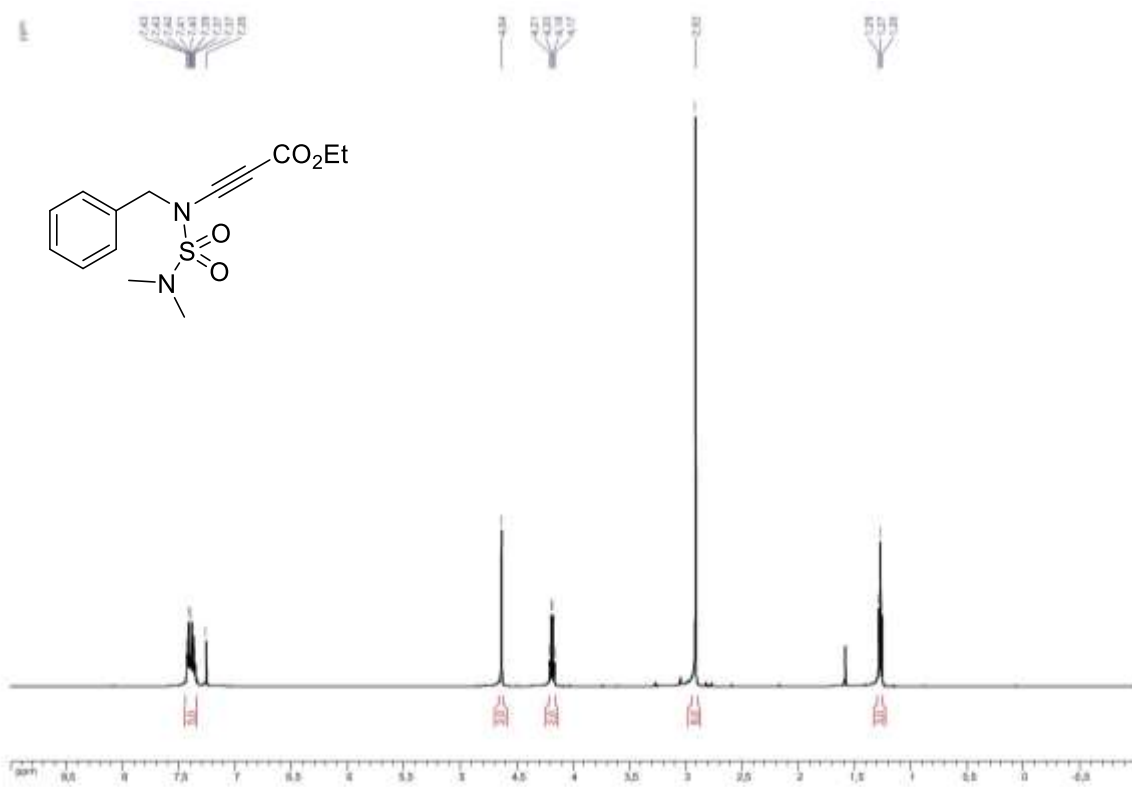

<sup>1</sup>H NMR (CDCl<sub>3</sub>, 500 MHz) of **5**

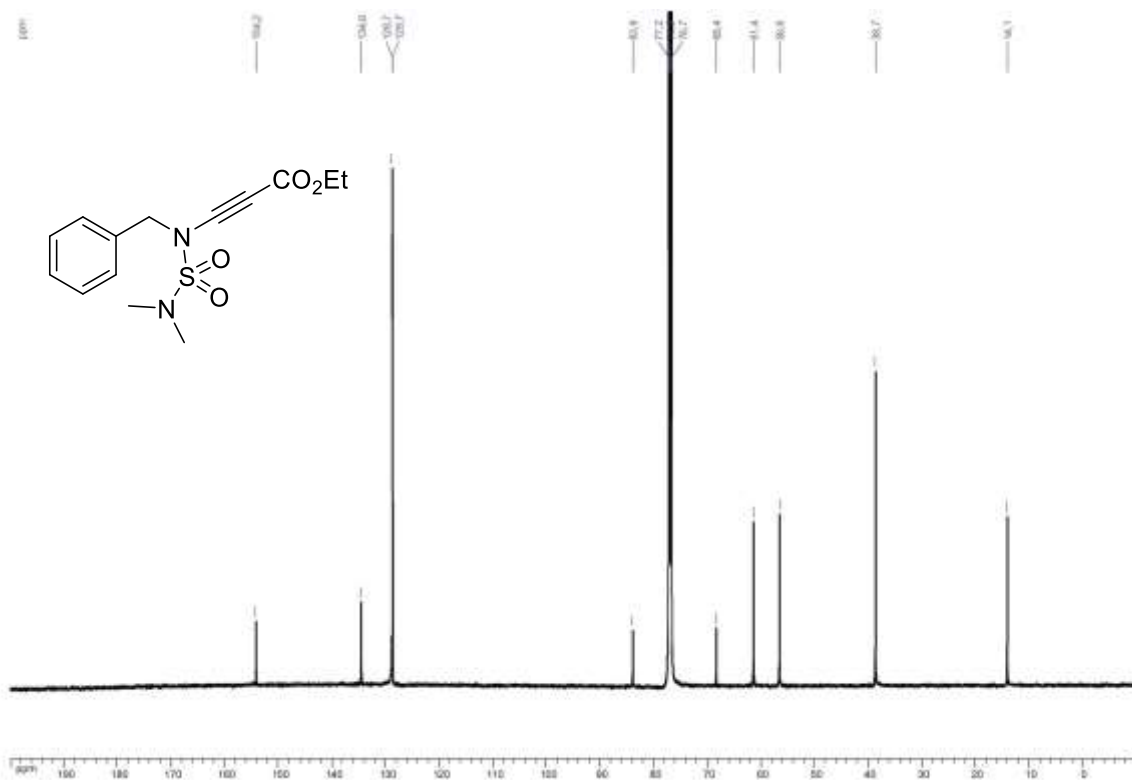

<sup>13</sup>C NMR (CDCl<sub>3</sub>, 125 MHz) of **5**

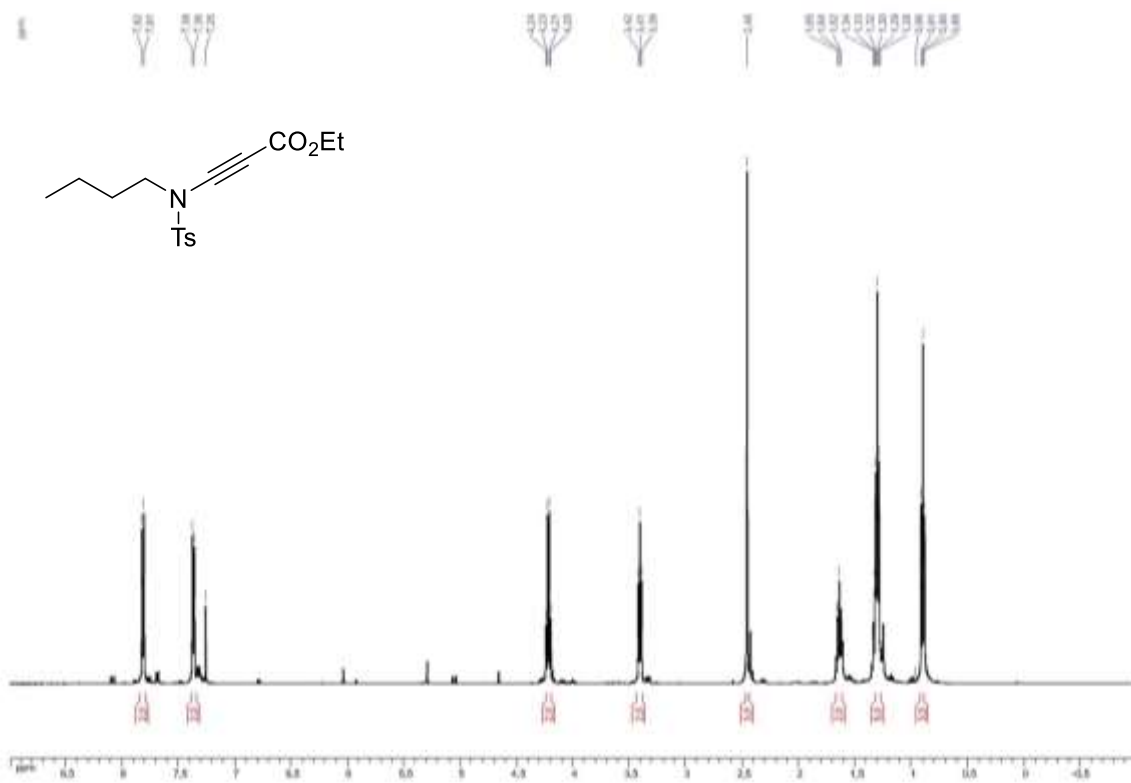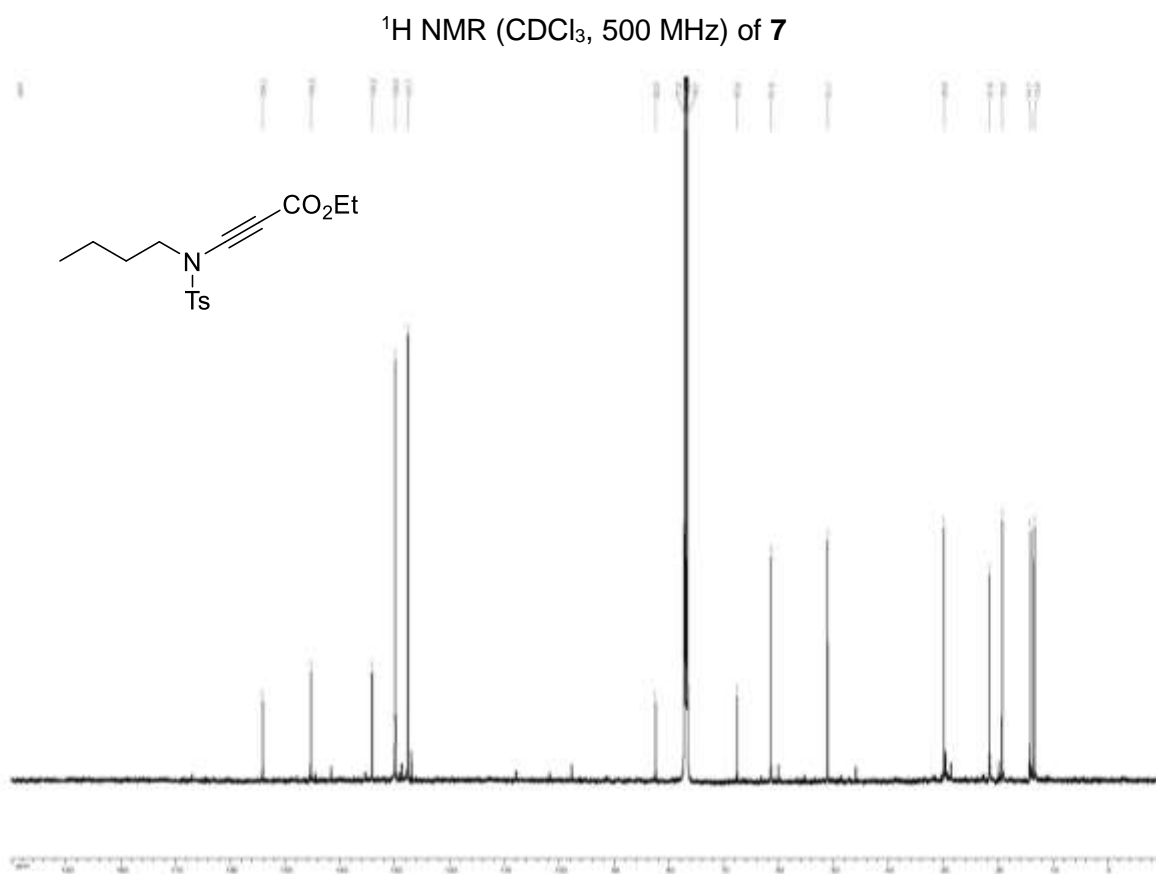



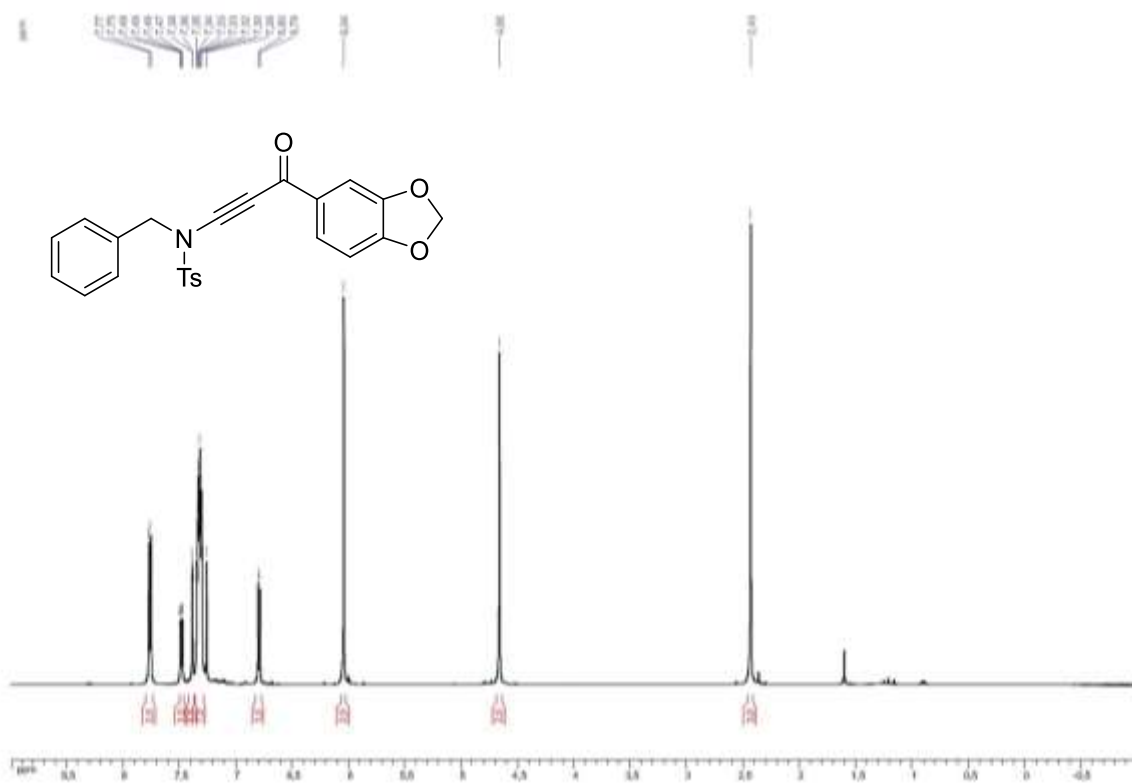

<sup>1</sup>H NMR (CDCl<sub>3</sub>, 500 MHz) of 9

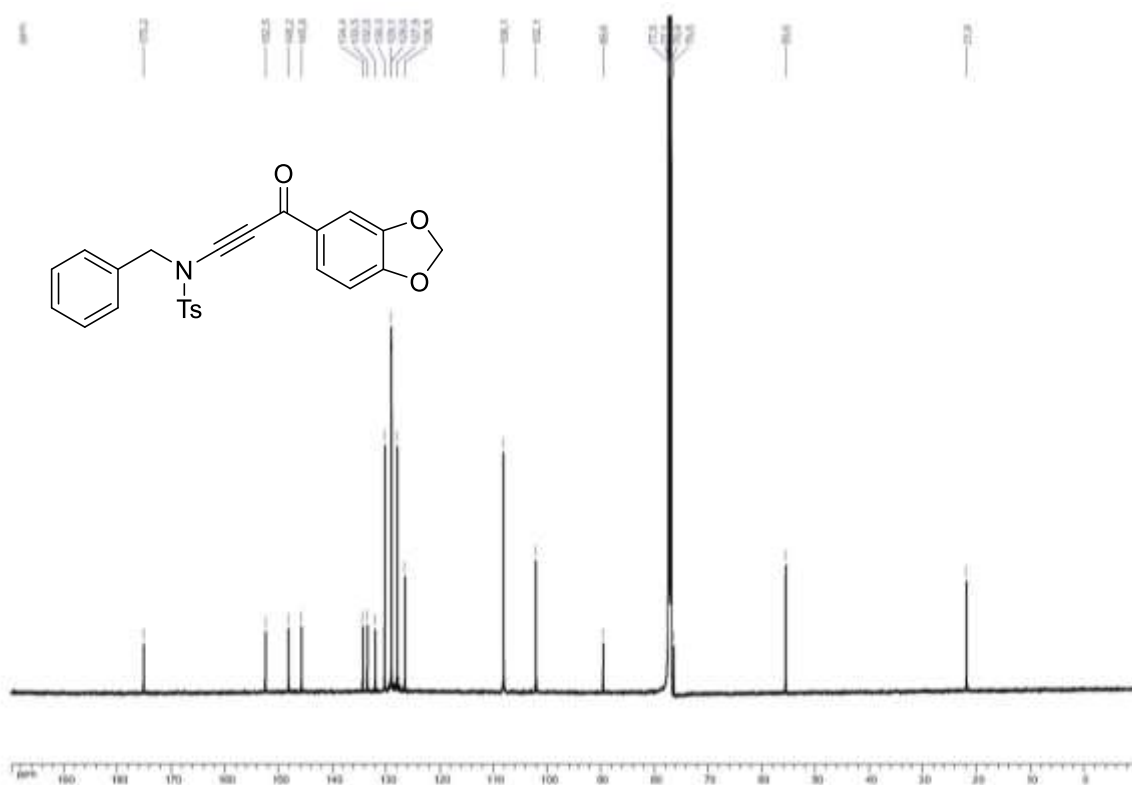

<sup>13</sup>C NMR (CDCl<sub>3</sub>, 125 MHz) of 9

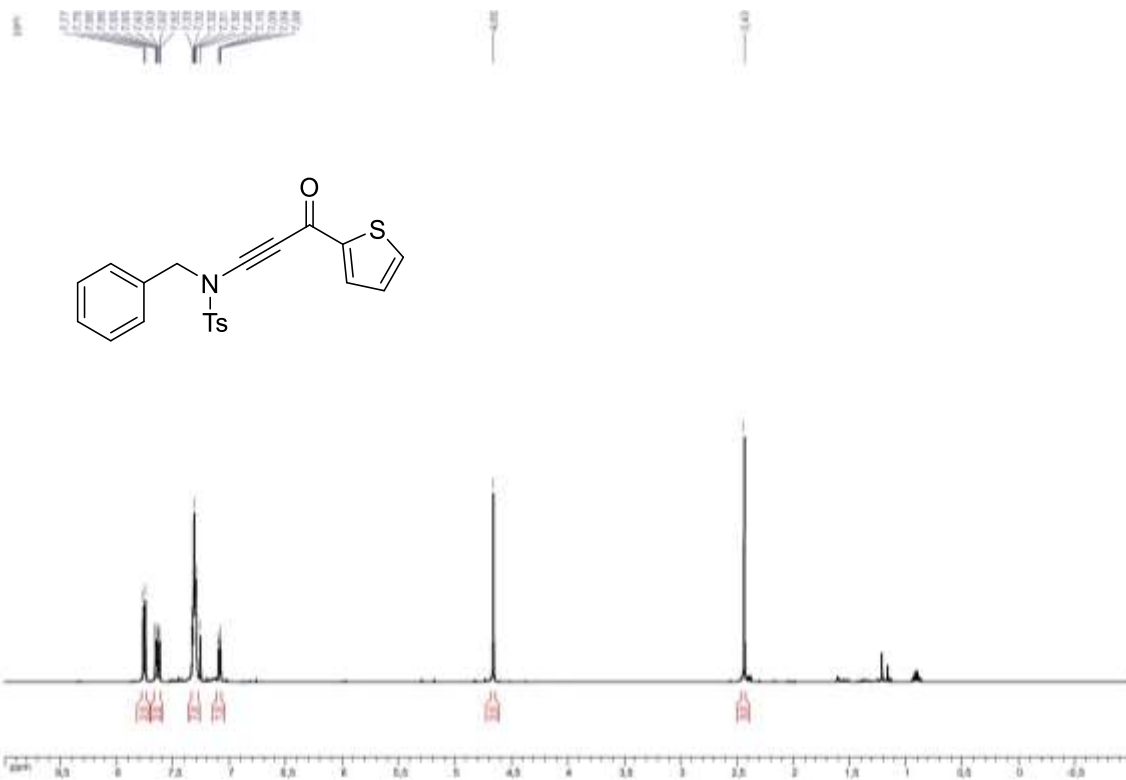

<sup>1</sup>H NMR (CDCl<sub>3</sub>, 500 MHz) of **10**

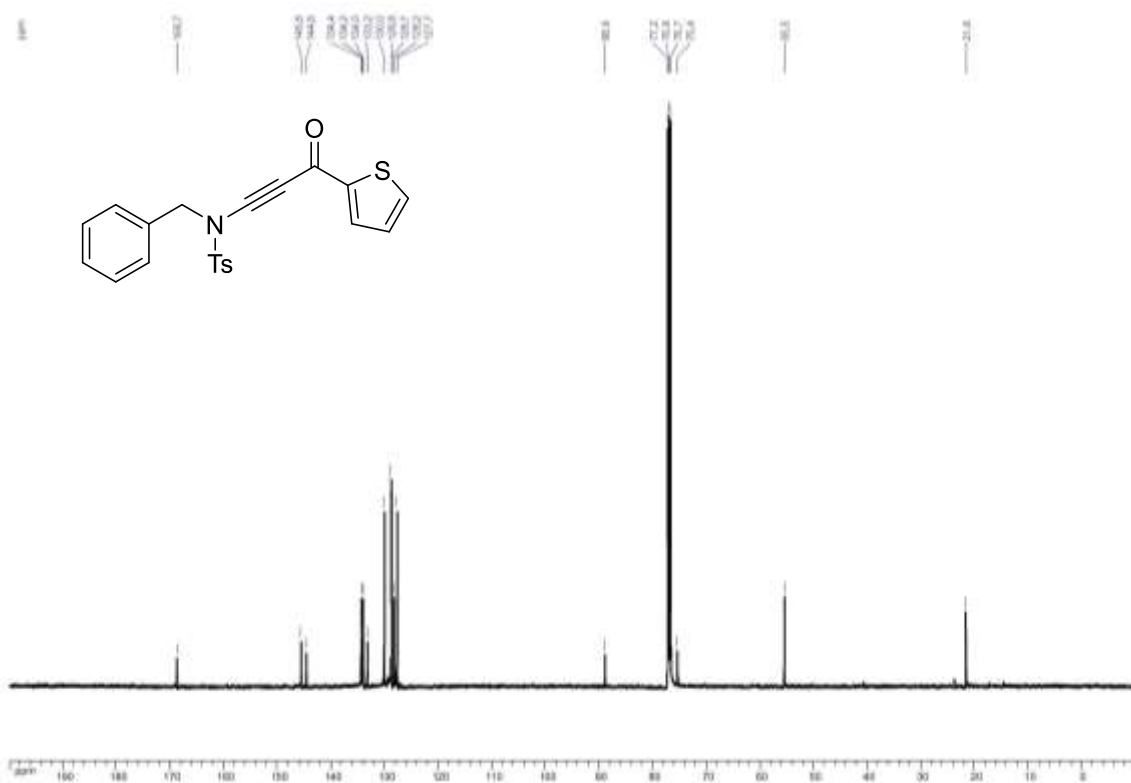

<sup>13</sup>C NMR (CDCl<sub>3</sub>, 125 MHz) of **10**

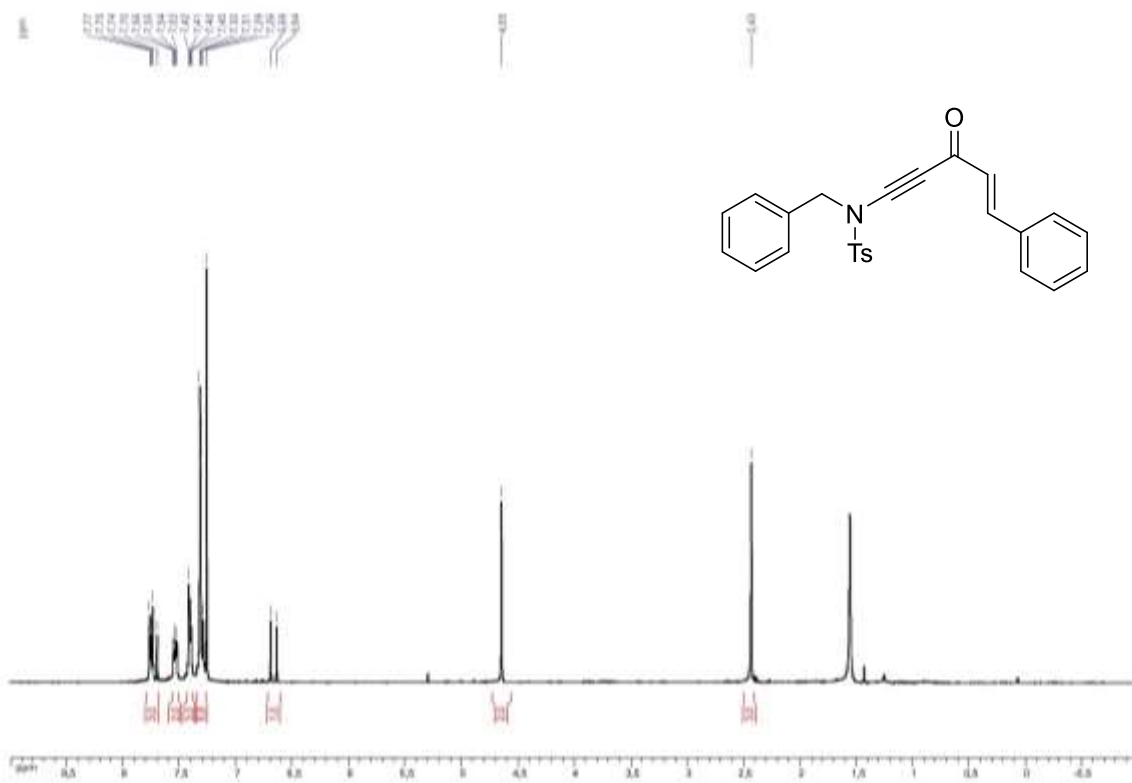

<sup>1</sup>H NMR (CDCl<sub>3</sub>, 500 MHz) of 11

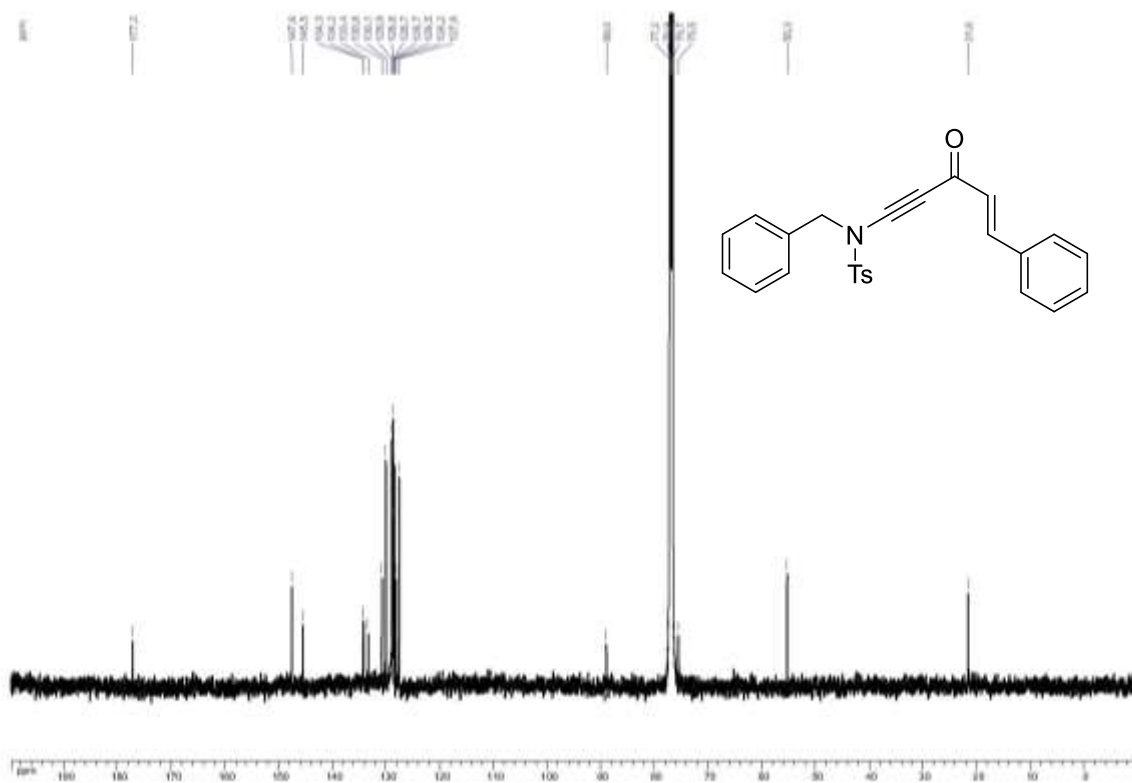

<sup>13</sup>C NMR (CDCl<sub>3</sub>, 125 MHz) of 11

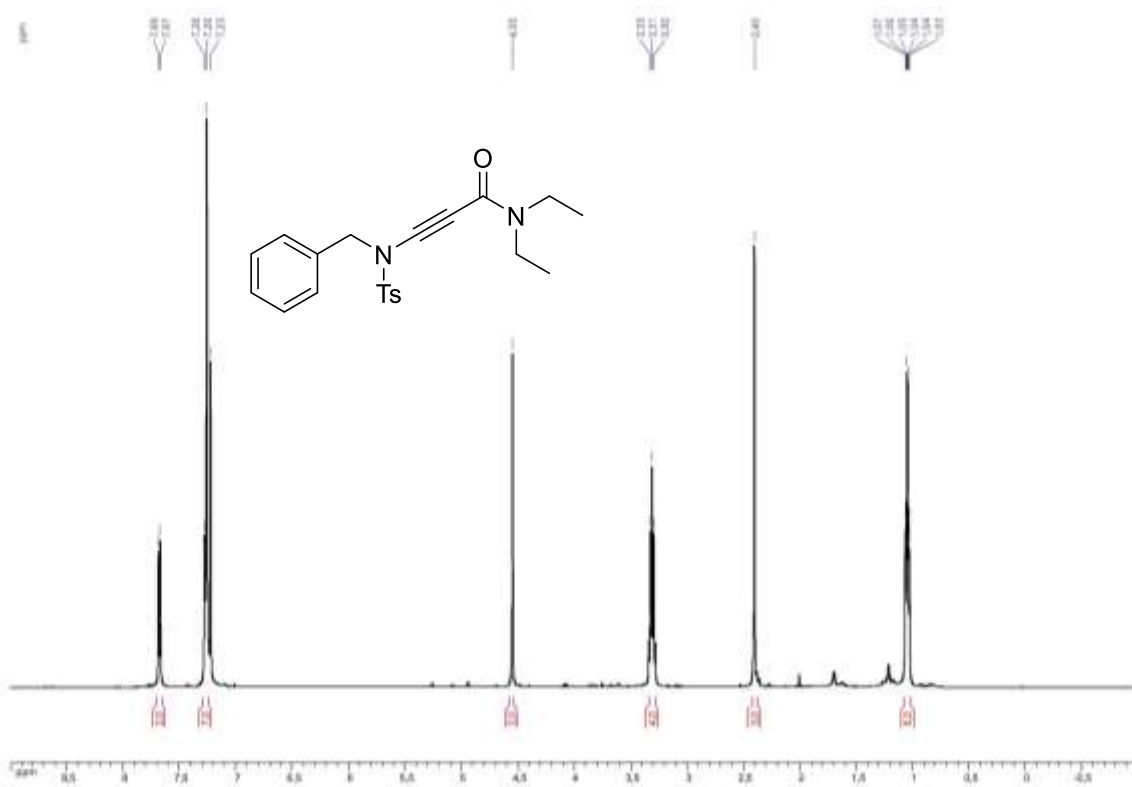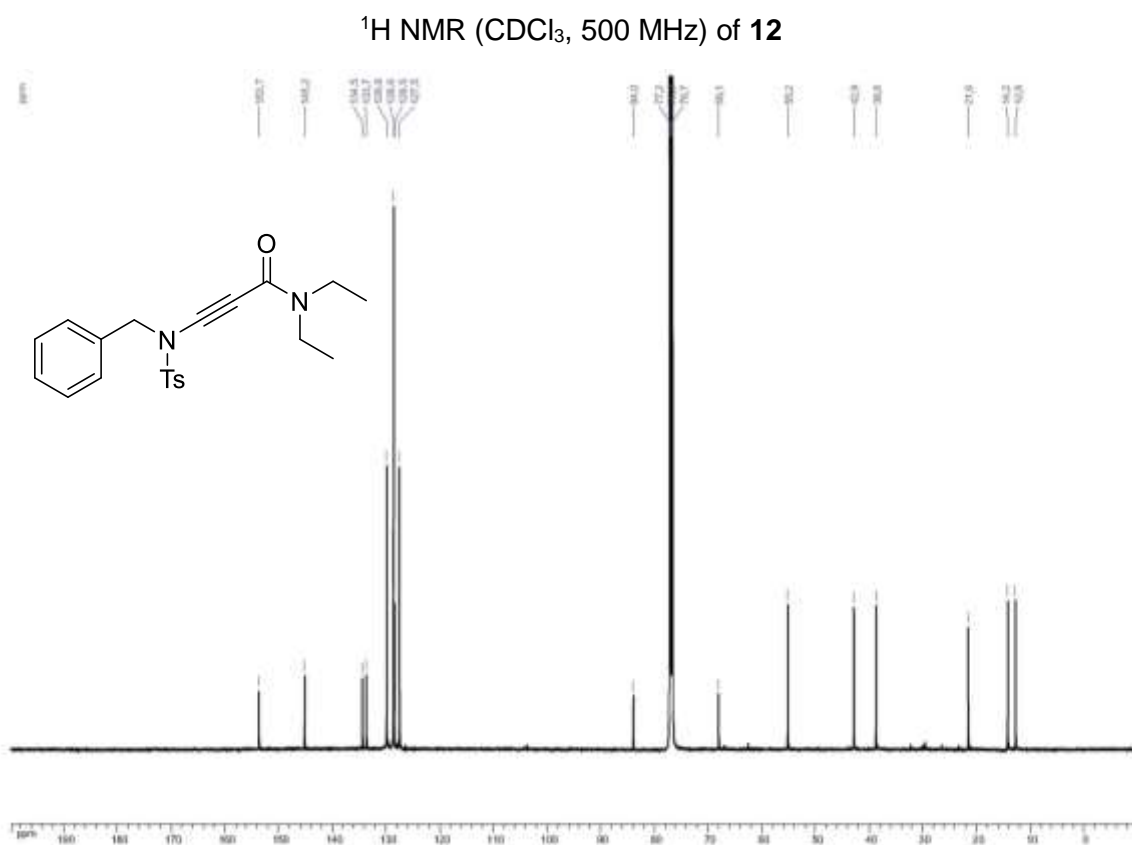

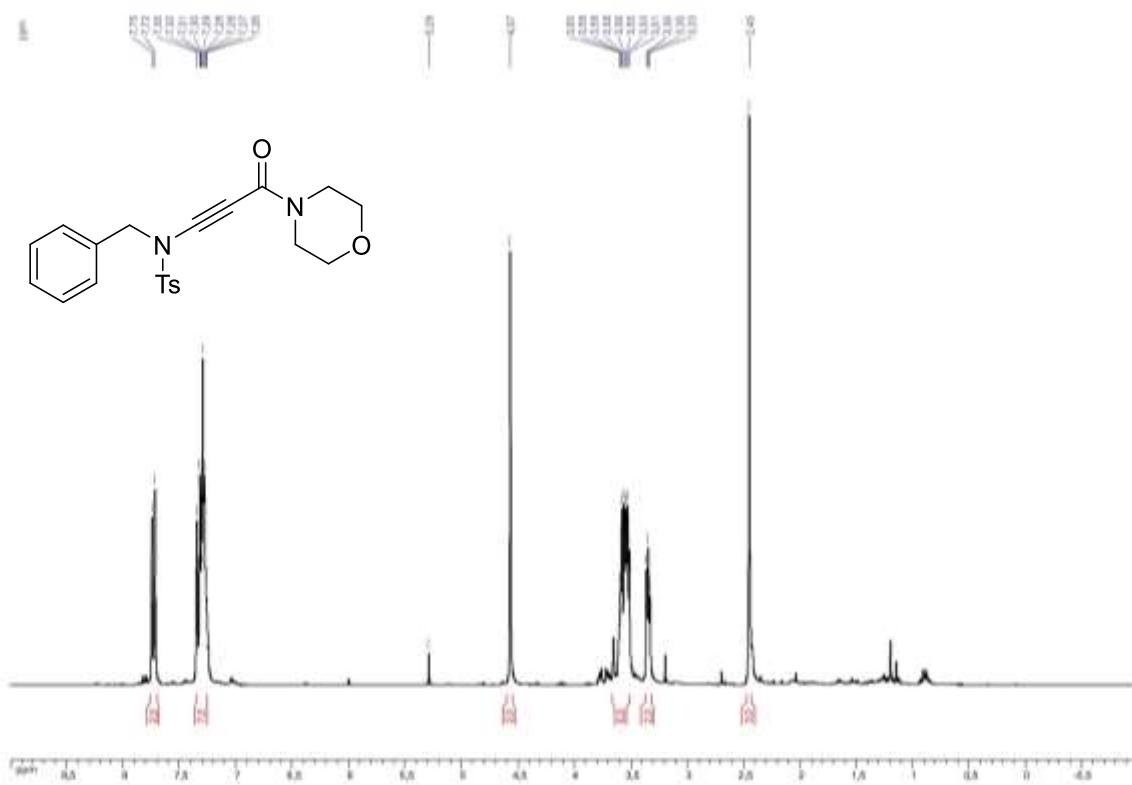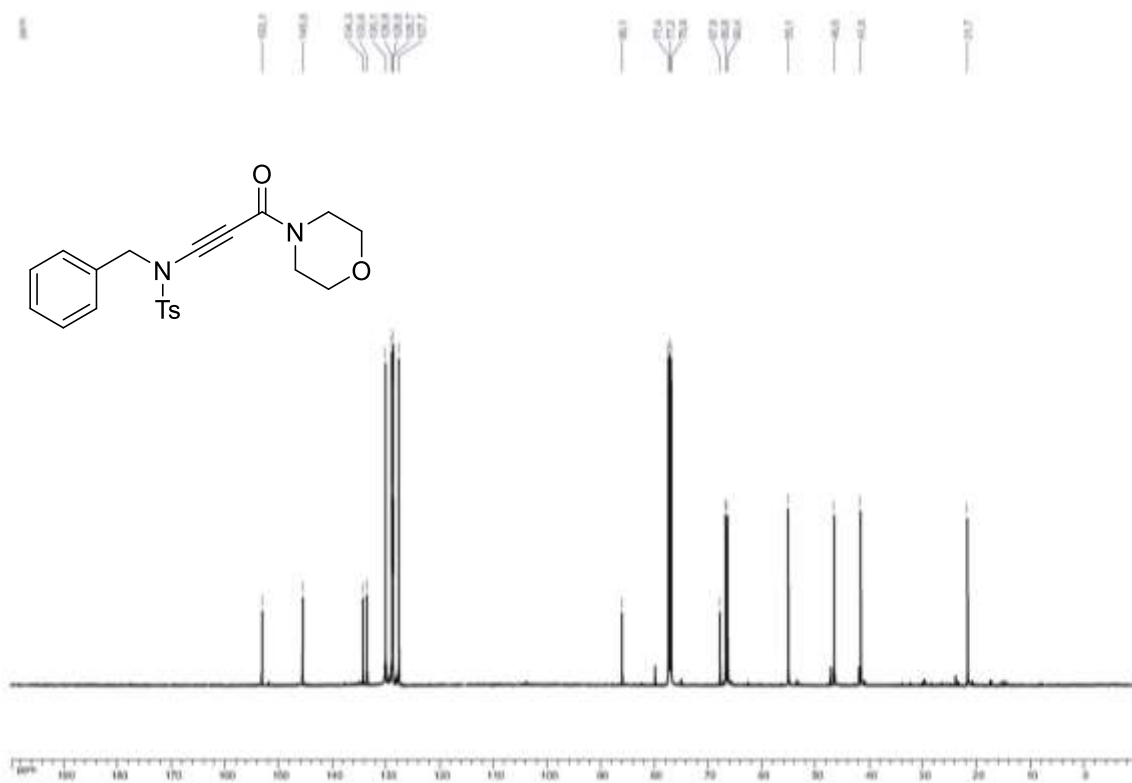

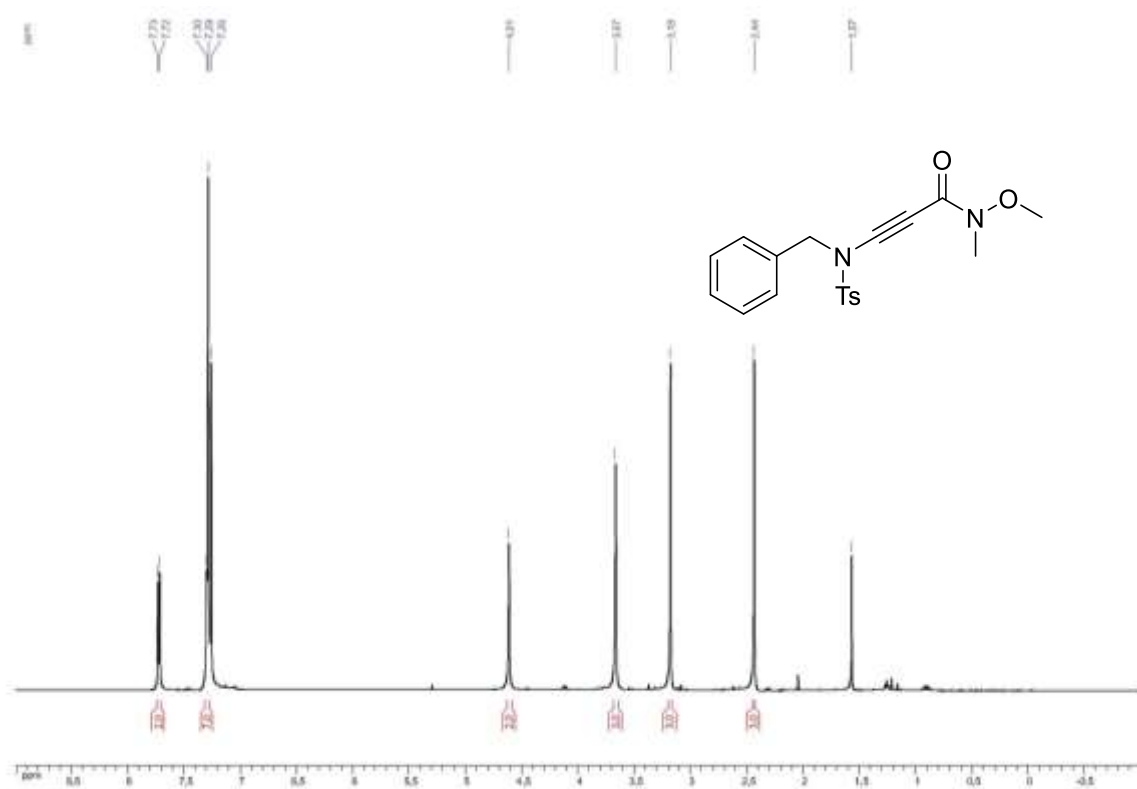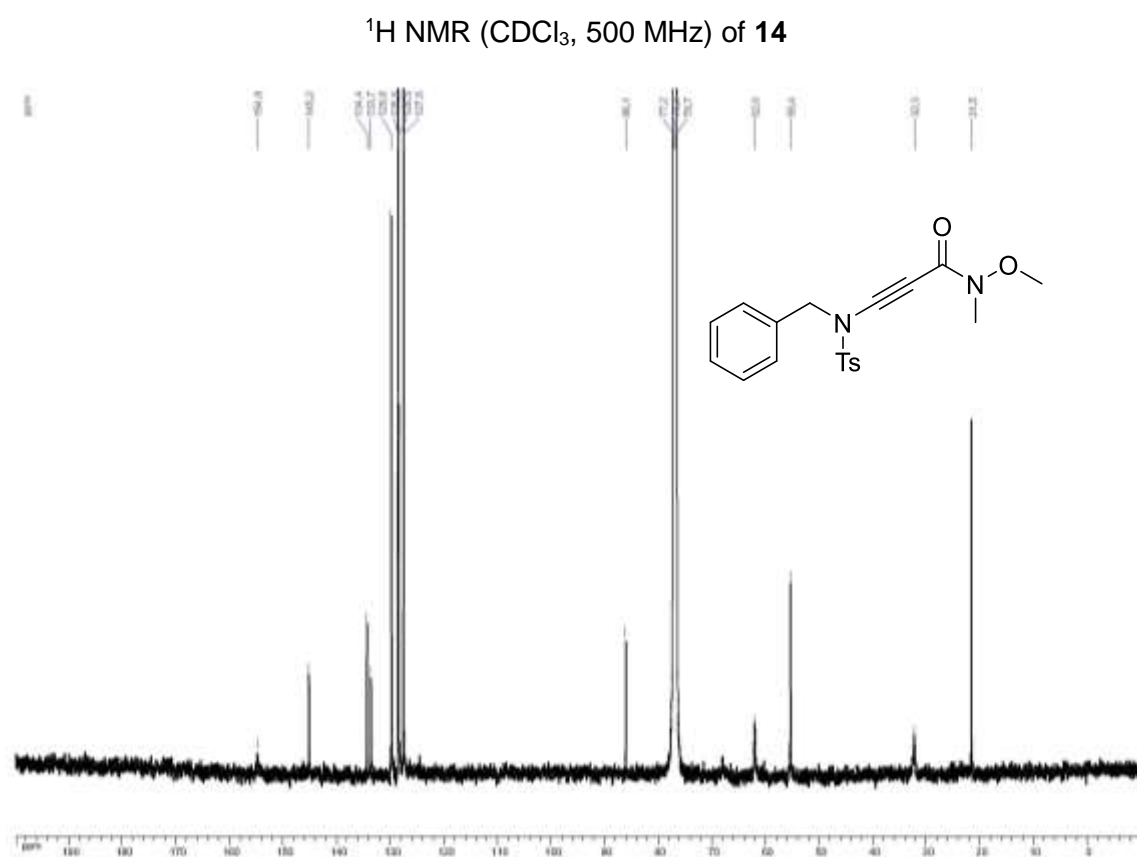

### <sup>1</sup>H and <sup>13</sup>C spectra for enesulfonamides 15/15' - 29/29'

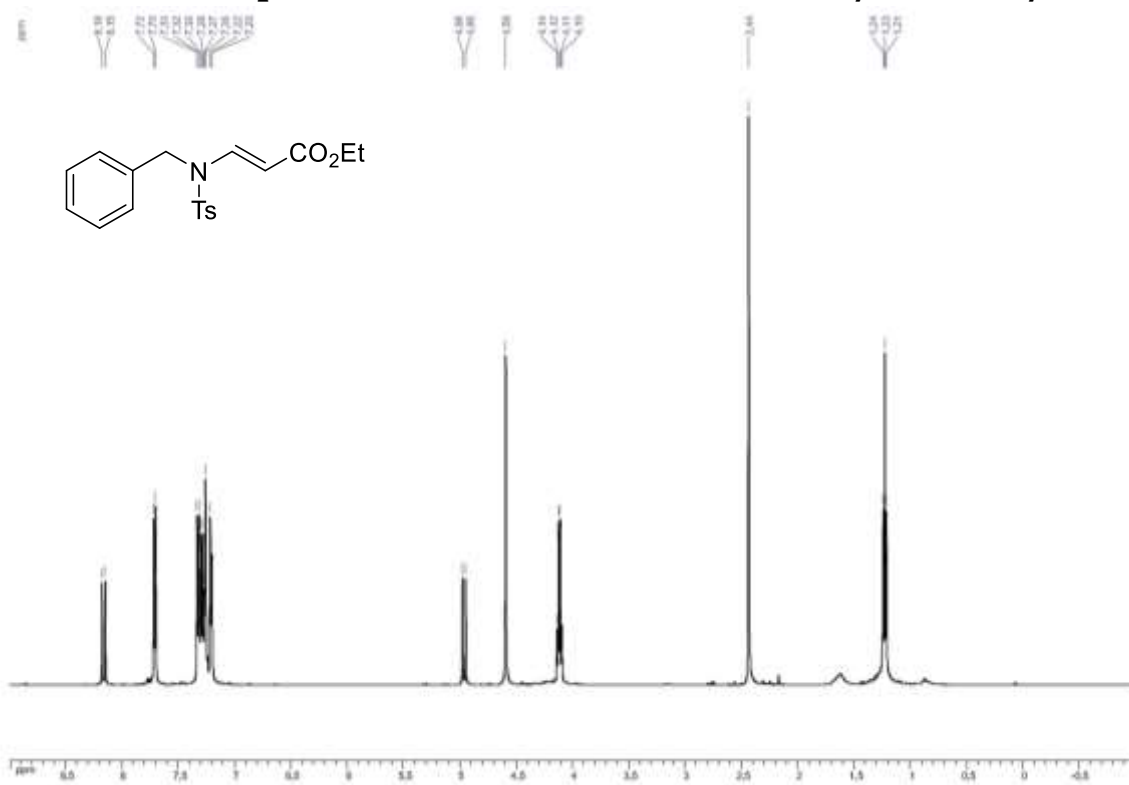

<sup>1</sup>H NMR (CDCl<sub>3</sub>, 500 MHz) of **15**

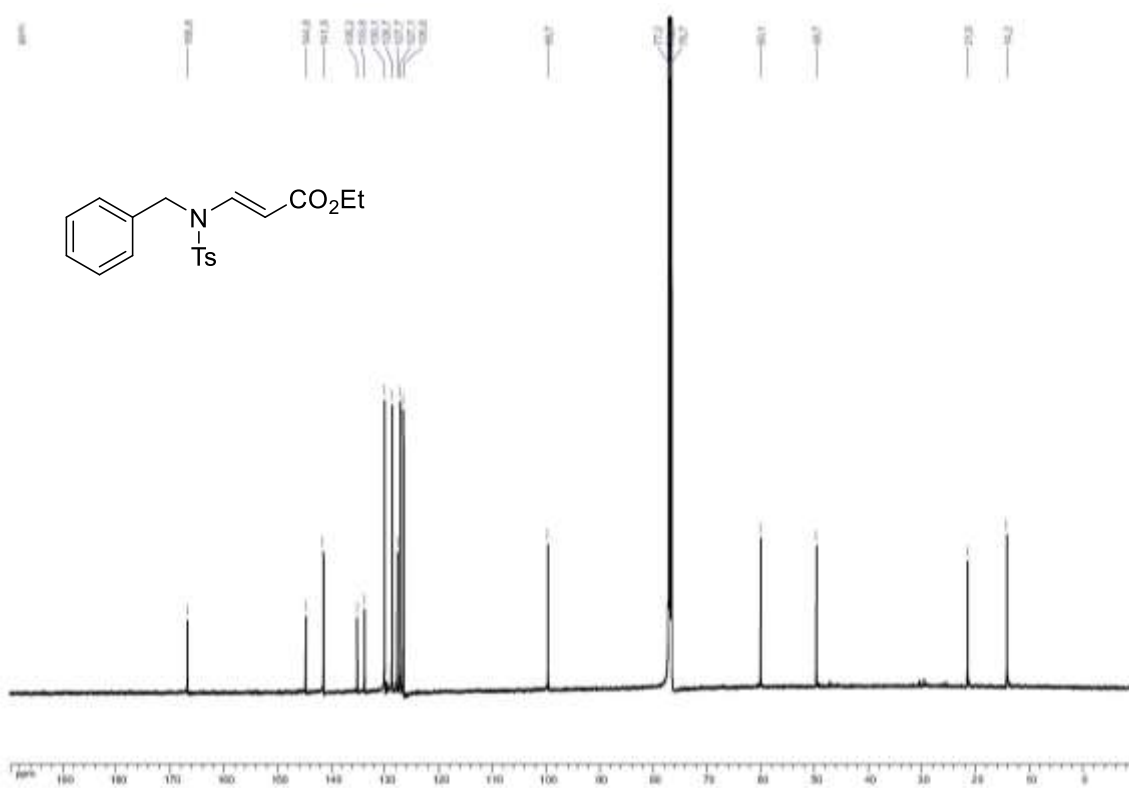

<sup>13</sup>C NMR (CDCl<sub>3</sub>, 125 MHz) of **15**

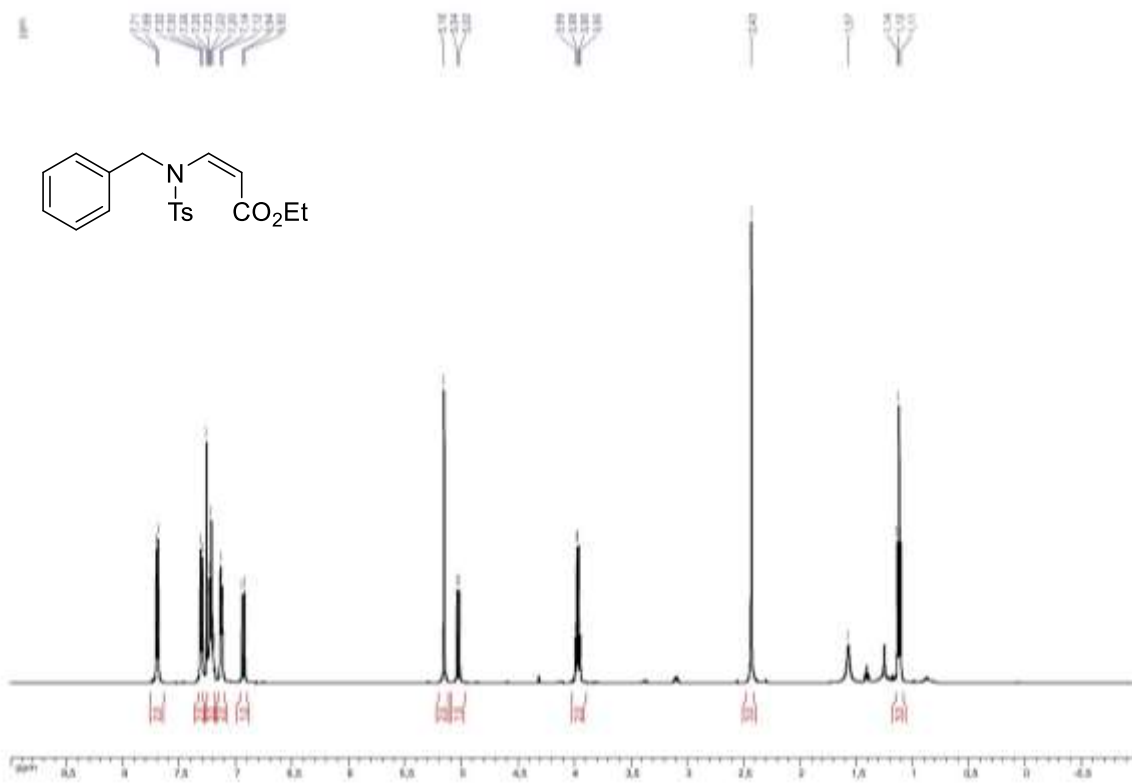

<sup>1</sup>H NMR (CDCl<sub>3</sub>, 500 MHz) of **15'**

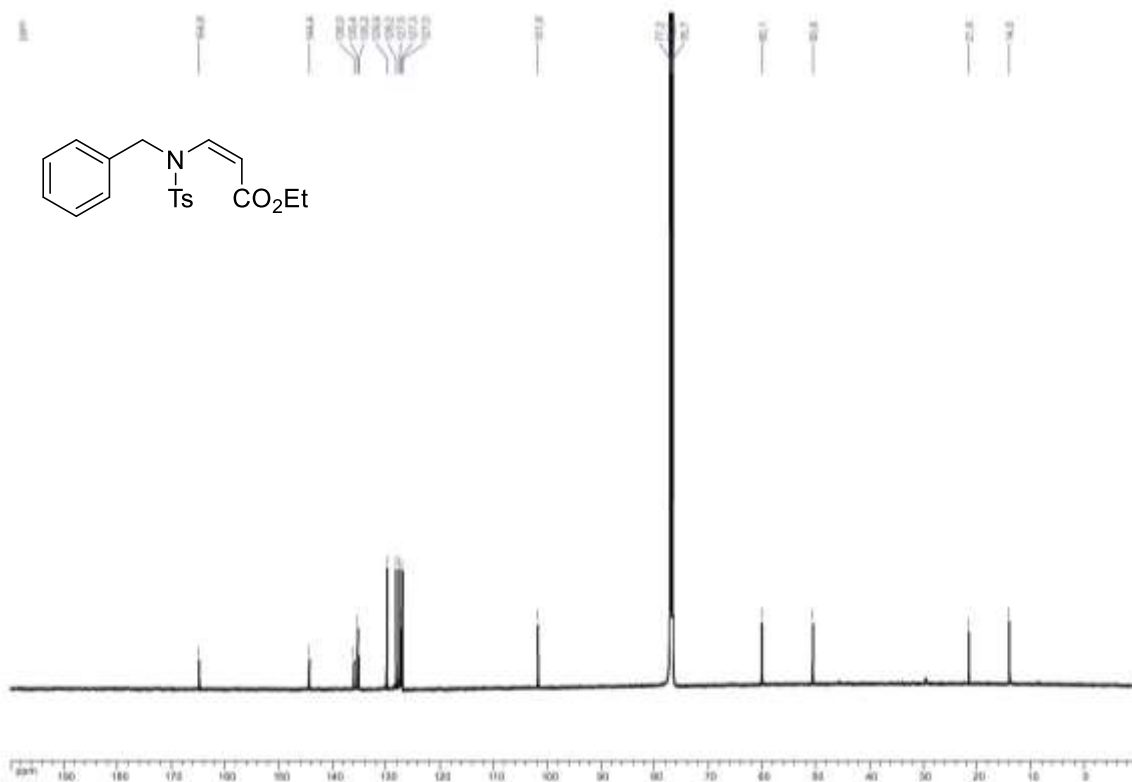

<sup>13</sup>C NMR (CDCl<sub>3</sub>, 125 MHz) of **15'**



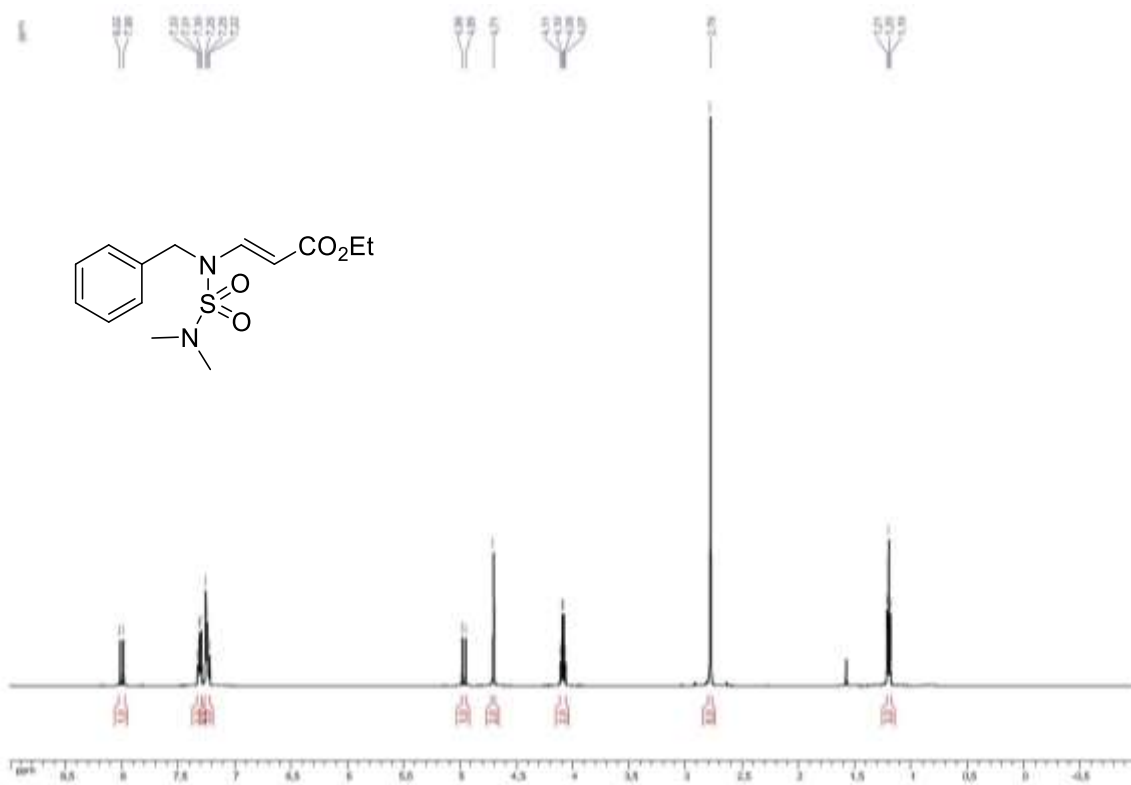

<sup>1</sup>H NMR (CDCl<sub>3</sub>, 500 MHz) of **16**

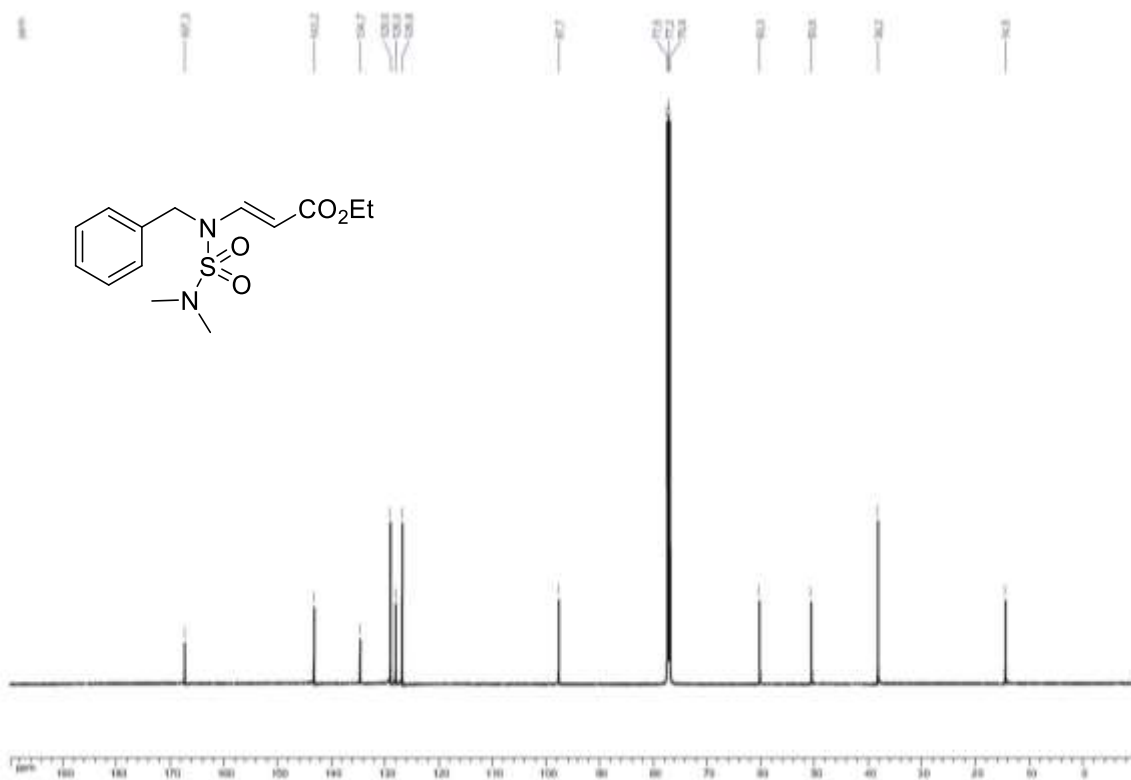

<sup>13</sup>C NMR (CDCl<sub>3</sub>, 125 MHz) of **16**

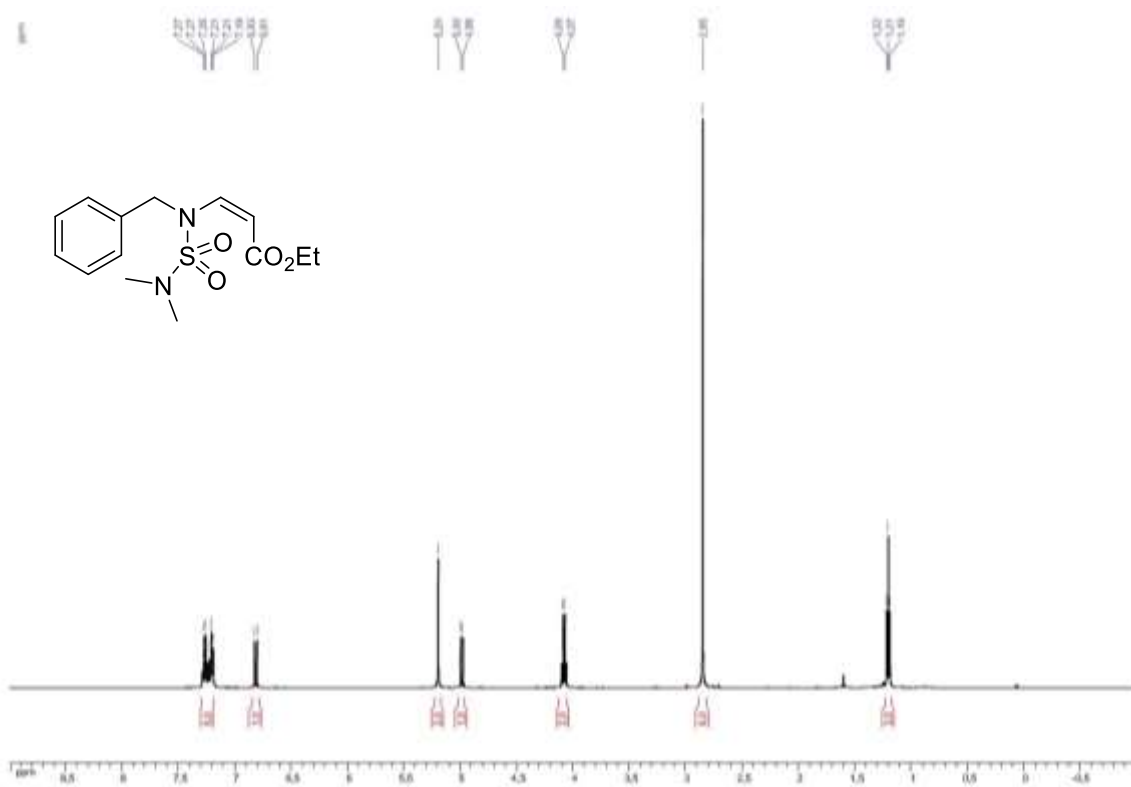

<sup>1</sup>H NMR (CDCl<sub>3</sub>, 500 MHz) of **16'**

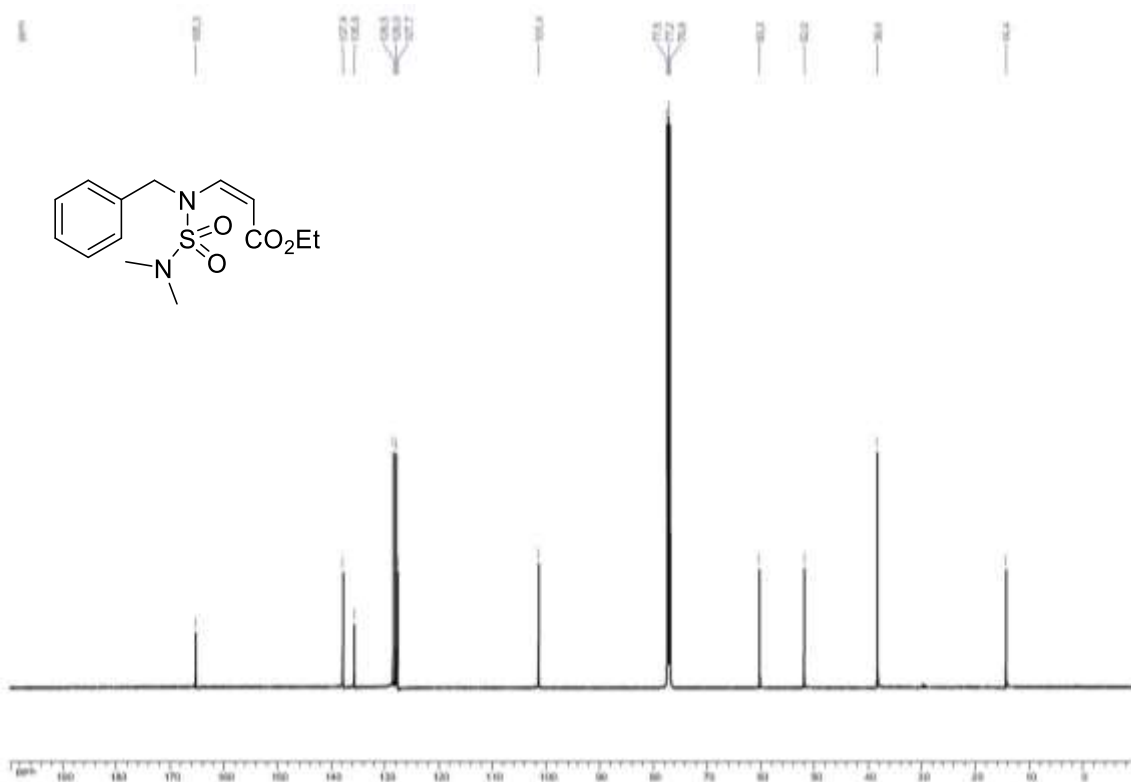

<sup>13</sup>C NMR (CDCl<sub>3</sub>, 125 MHz) of **16'**

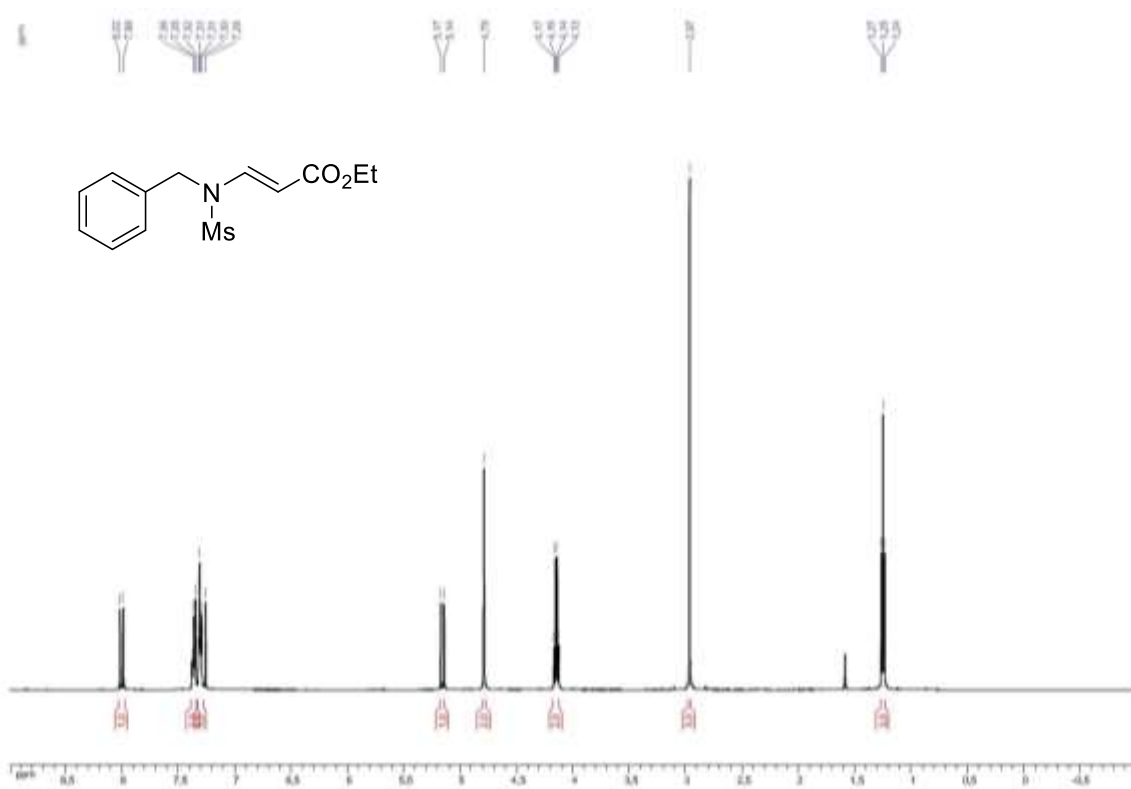

<sup>1</sup>H NMR (CDCl<sub>3</sub>, 500 MHz) of 17

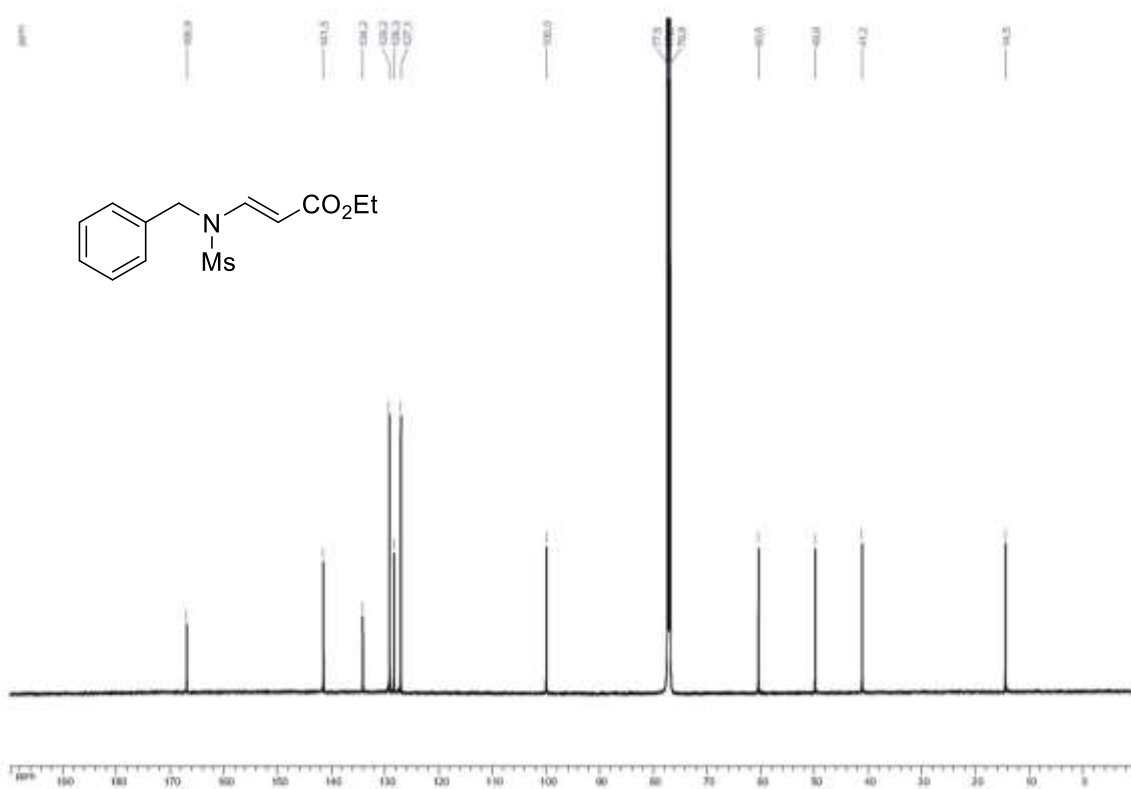

<sup>13</sup>C NMR (CDCl<sub>3</sub>, 125 MHz) of 17

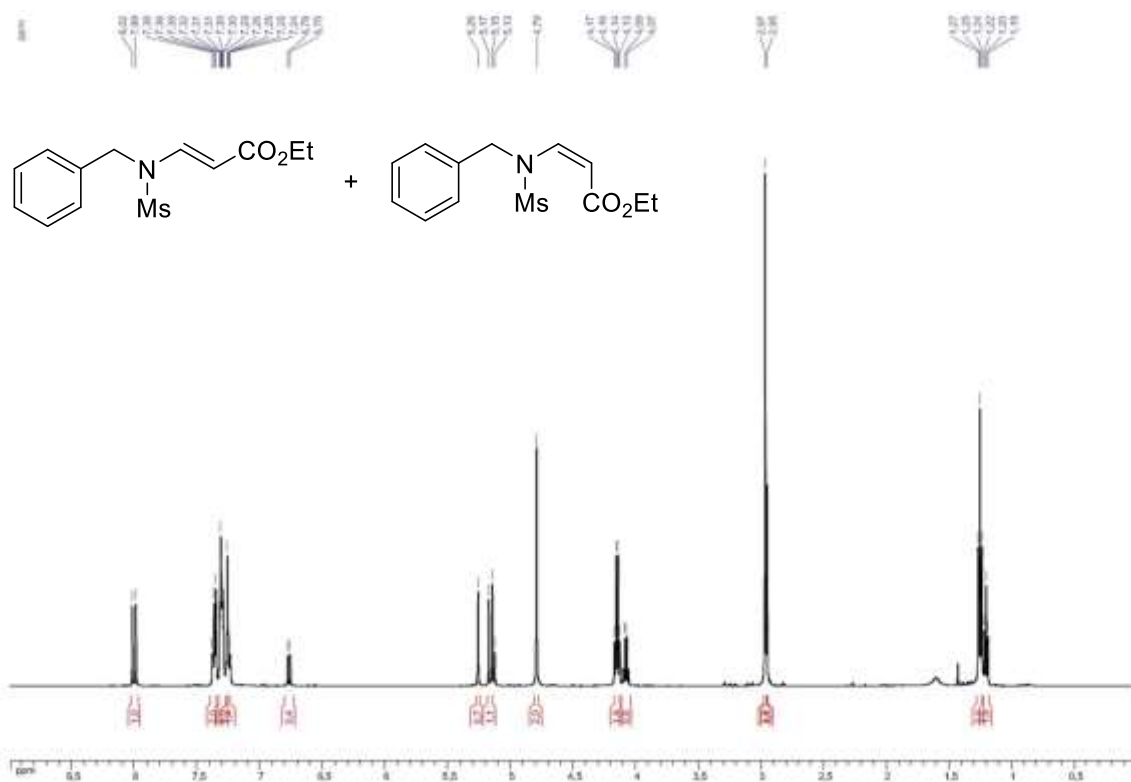

<sup>1</sup>H NMR (CDCl<sub>3</sub>, 500 MHz) of **17/17'**

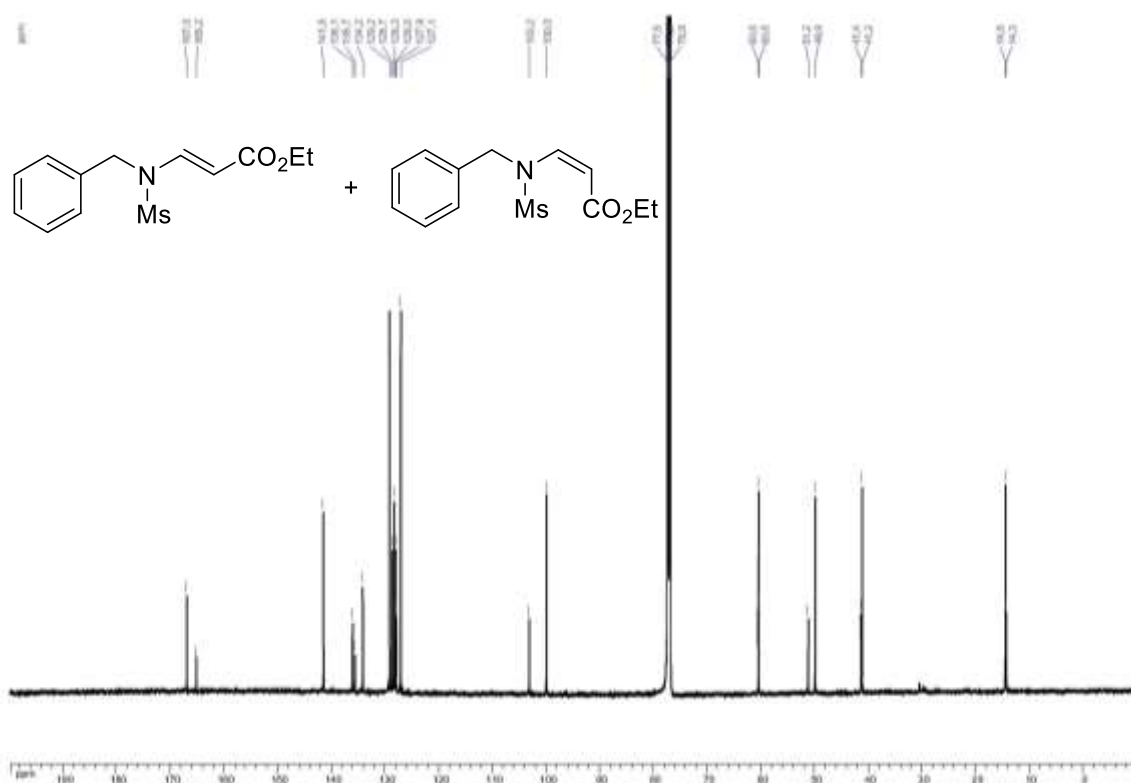

<sup>13</sup>C NMR (CDCl<sub>3</sub>, 125 MHz) of **17/17'**

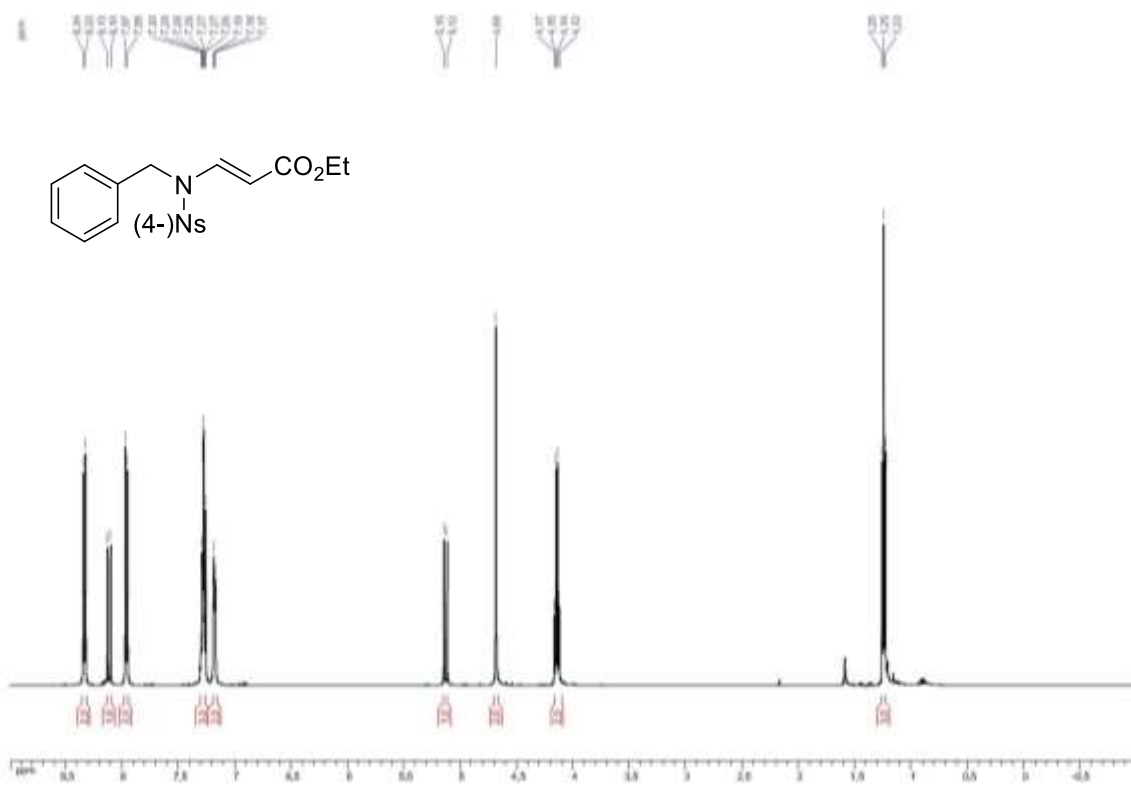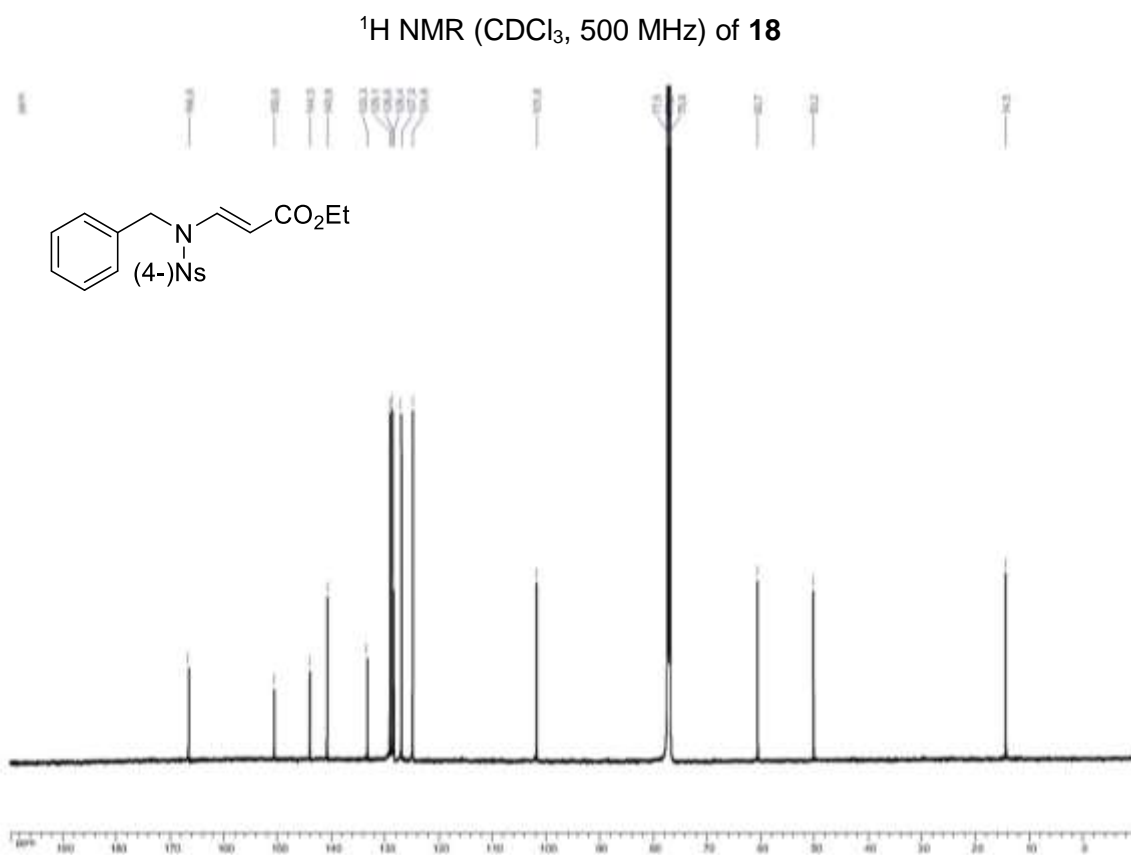

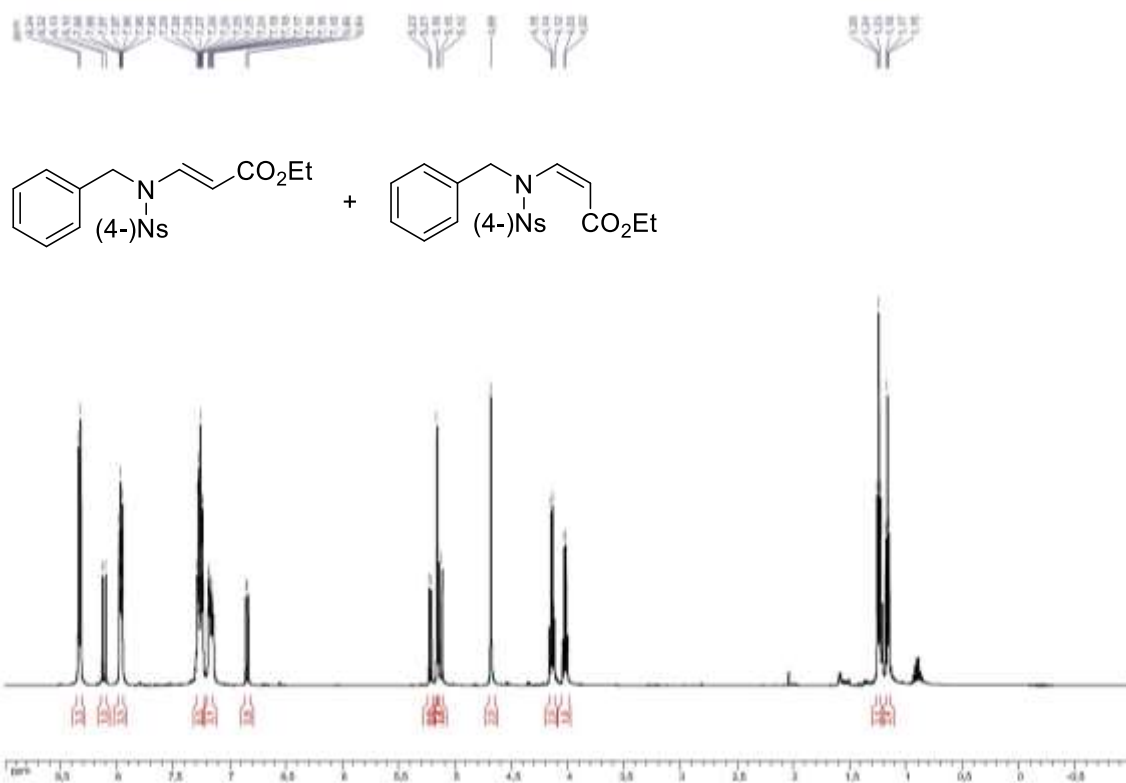

$^1\text{H NMR}$  (CDCl<sub>3</sub>, 500 MHz) of **18/18'**

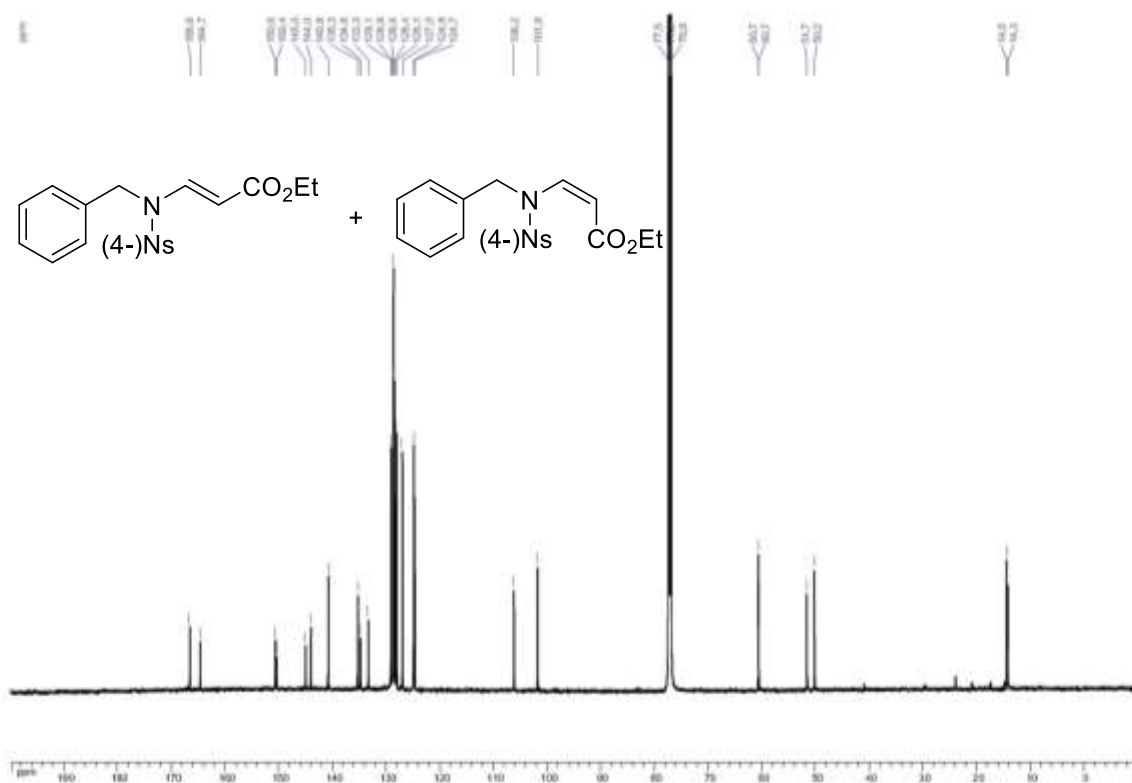

$^{13}\text{C NMR}$  (CDCl<sub>3</sub>, 125 MHz) of **18/18'**

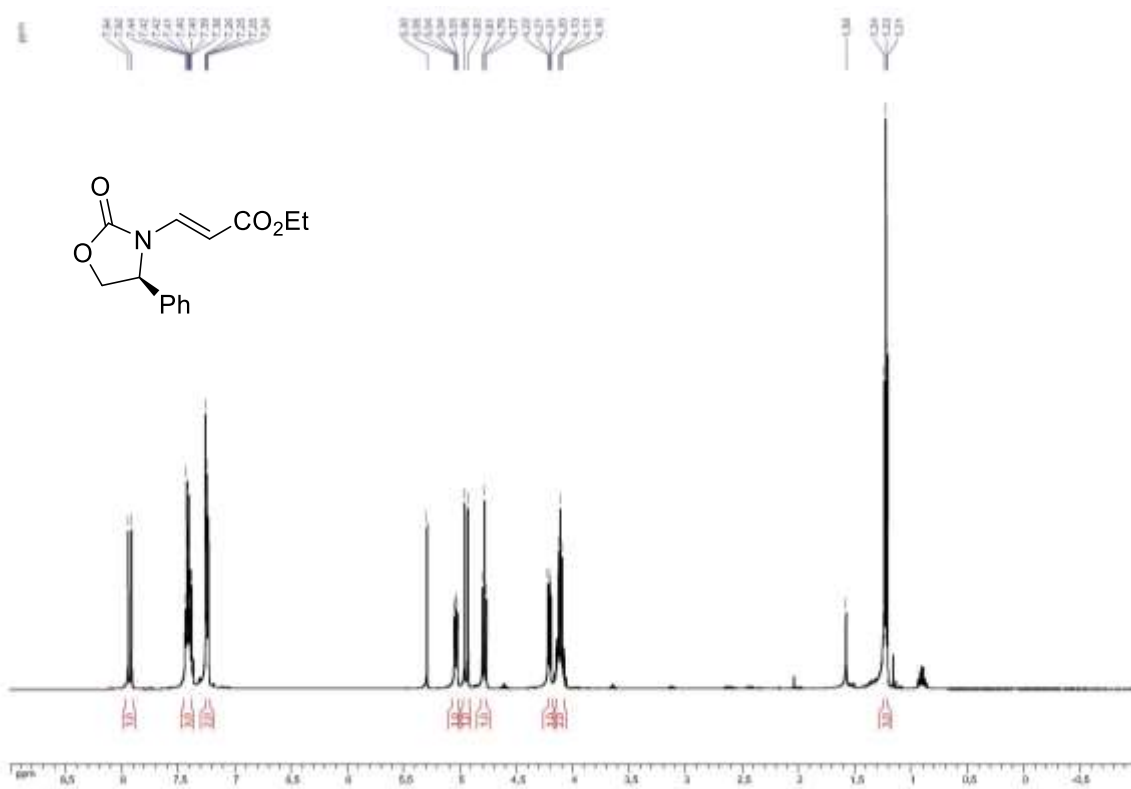

<sup>1</sup>H NMR (CDCl<sub>3</sub>, 500 MHz) of **19**

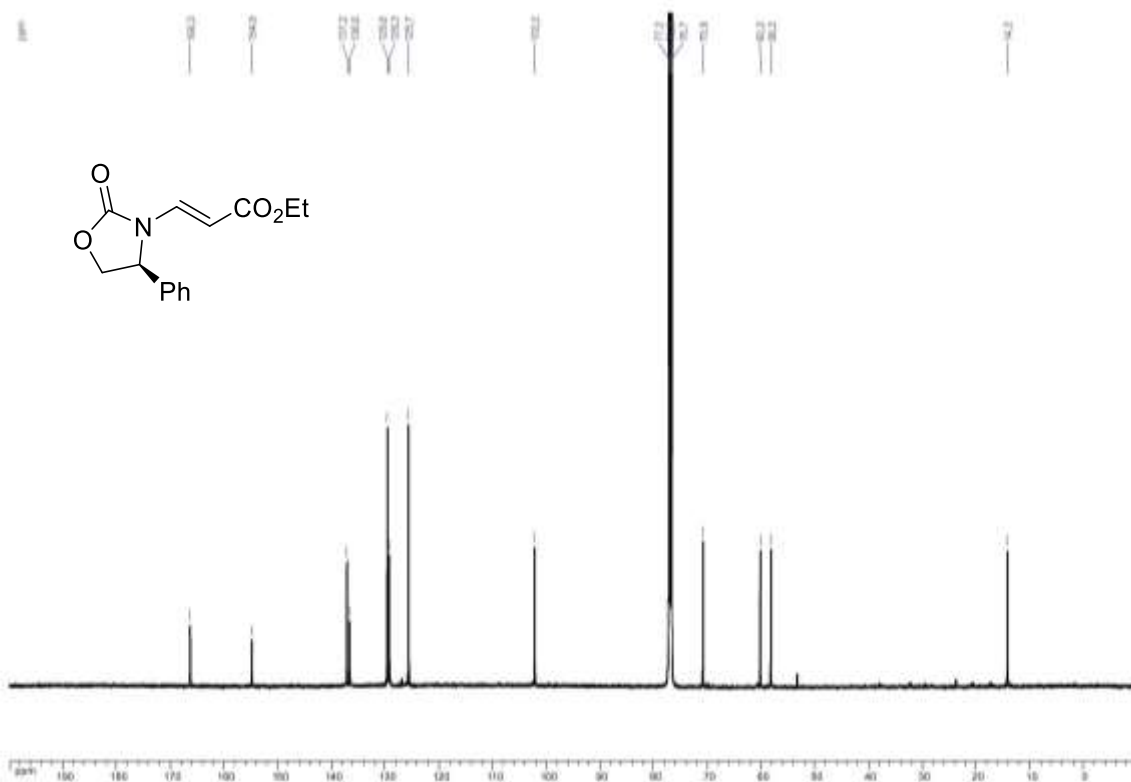

<sup>13</sup>C NMR (CDCl<sub>3</sub>, 125 MHz) of **19**

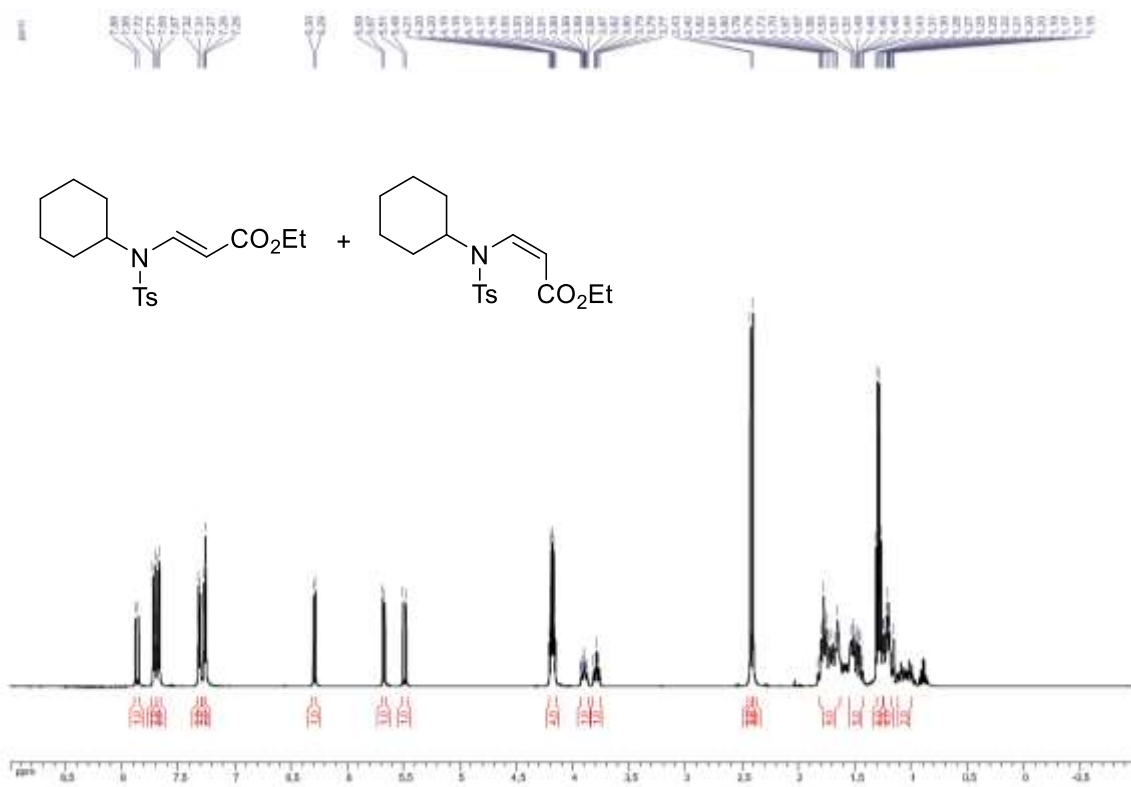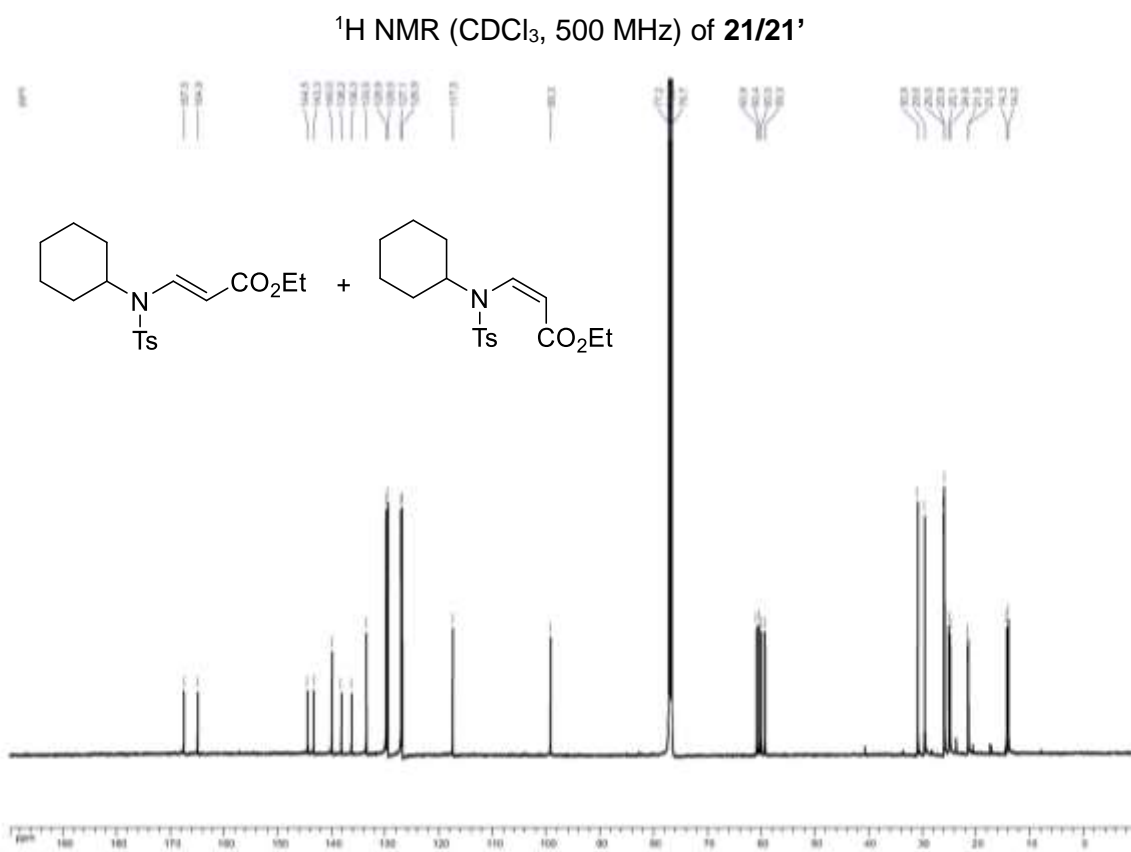



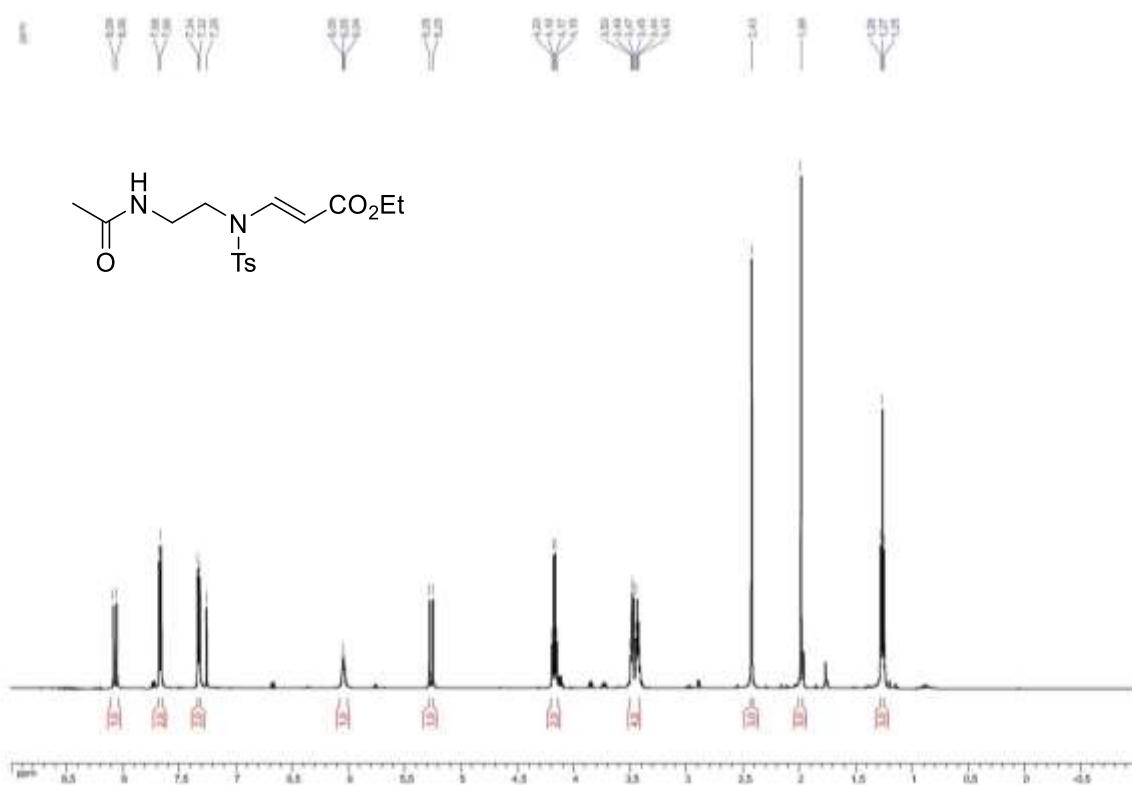

<sup>1</sup>H NMR (CDCl<sub>3</sub>, 500 MHz) of **22**

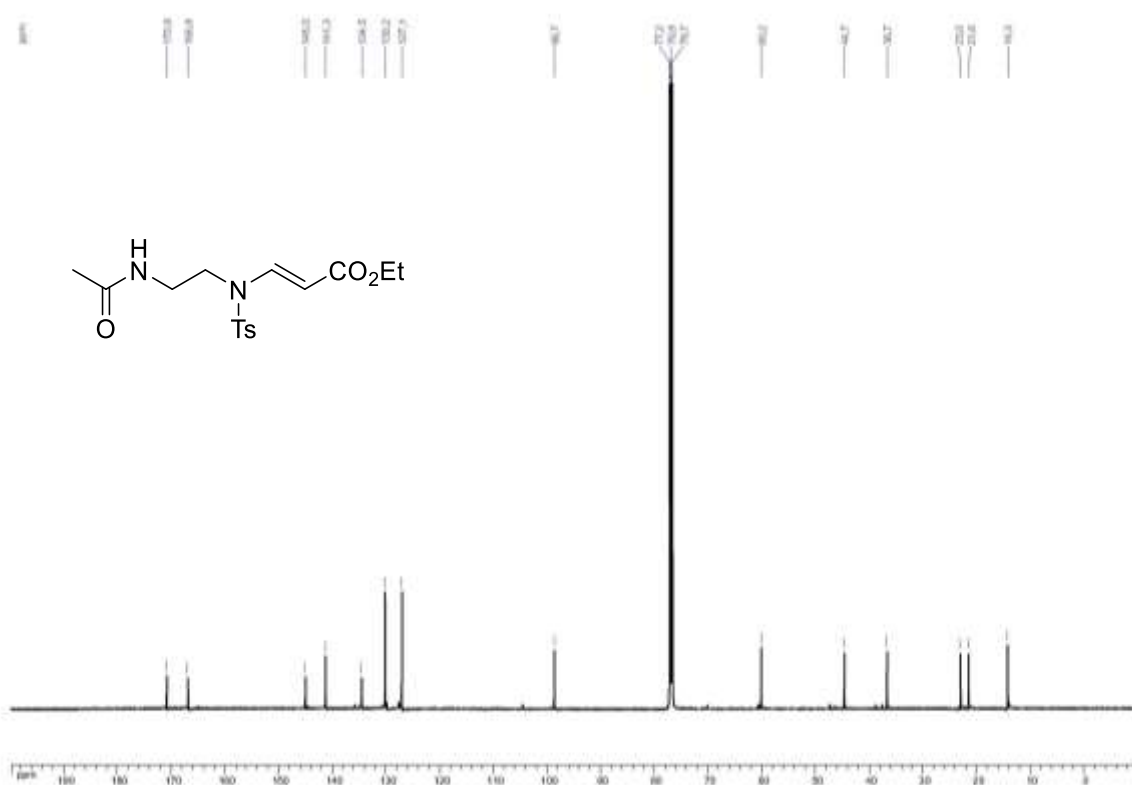

<sup>13</sup>C NMR (CDCl<sub>3</sub>, 125 MHz) of **22**

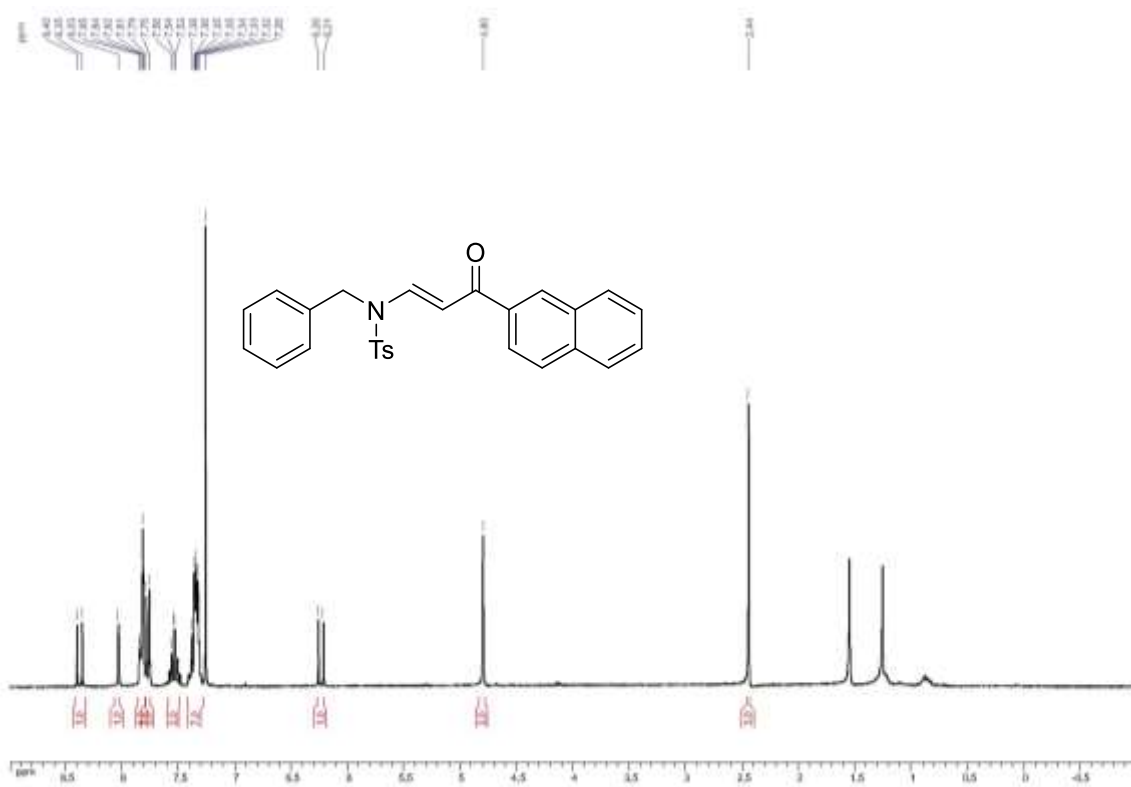

$^1\text{H}$  NMR ( $\text{CDCl}_3$ , 500 MHz) of **24**

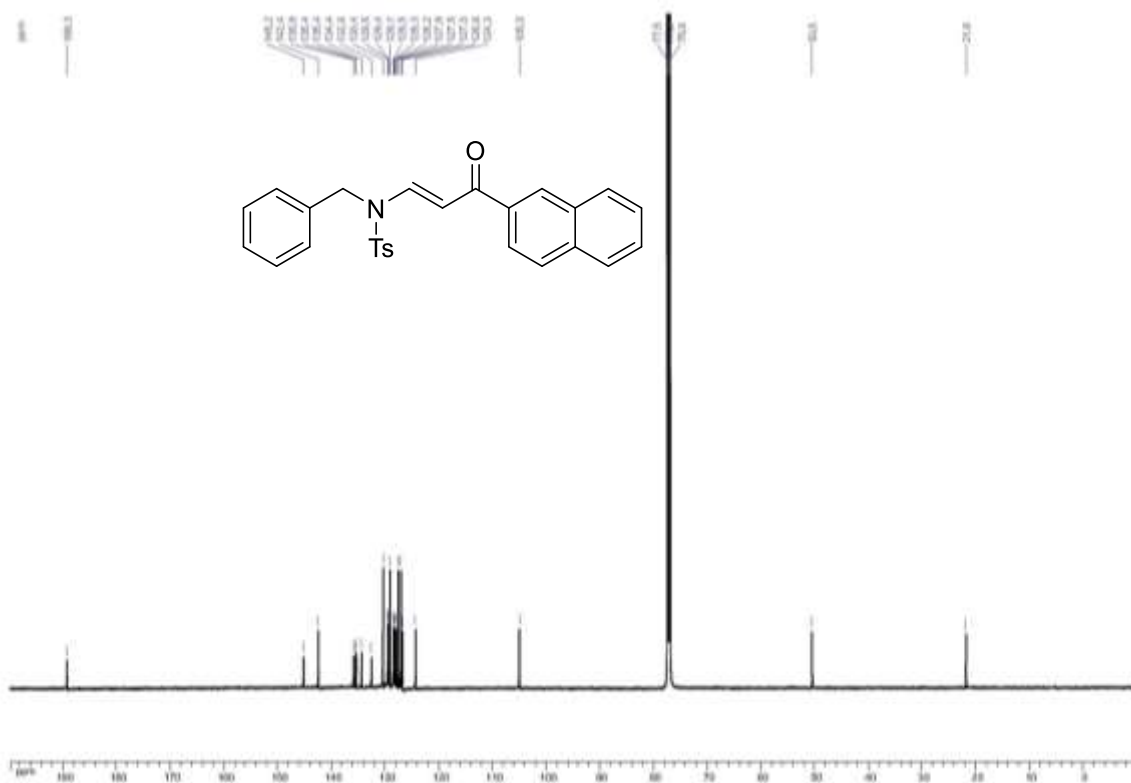

$^{13}\text{C}$  NMR ( $\text{CDCl}_3$ , 125 MHz) of **24**

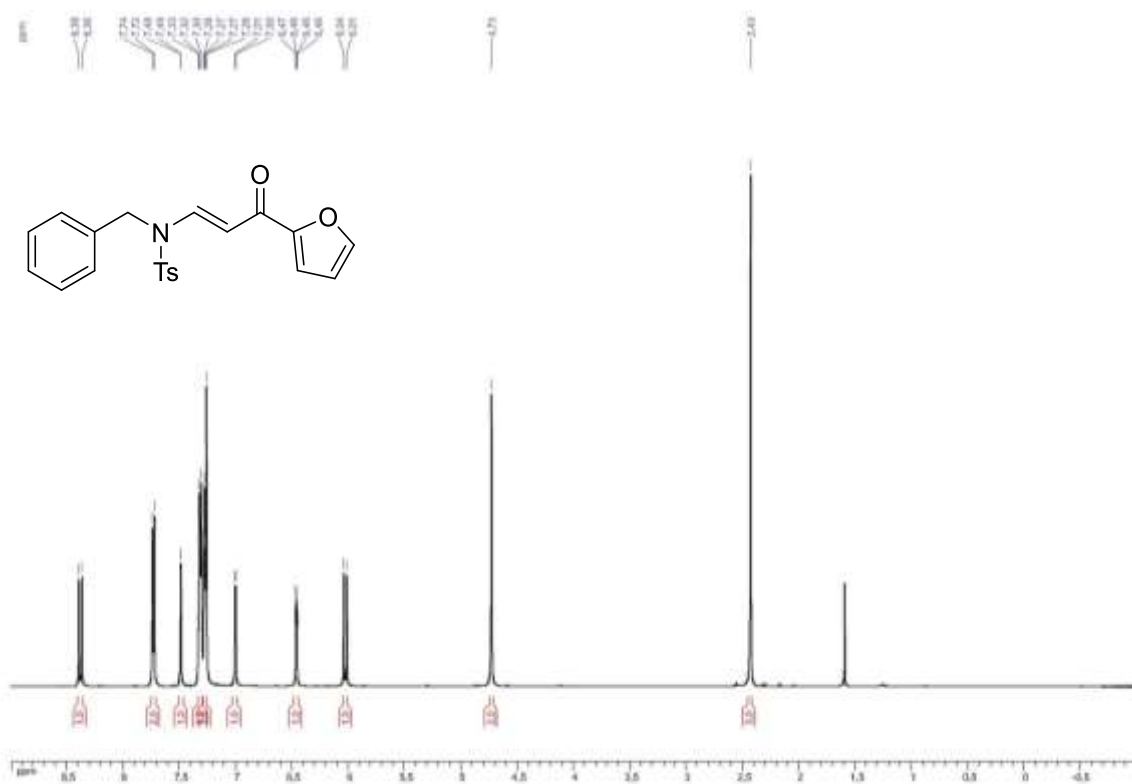

<sup>1</sup>H NMR (CDCl<sub>3</sub>, 500 MHz) of **25**

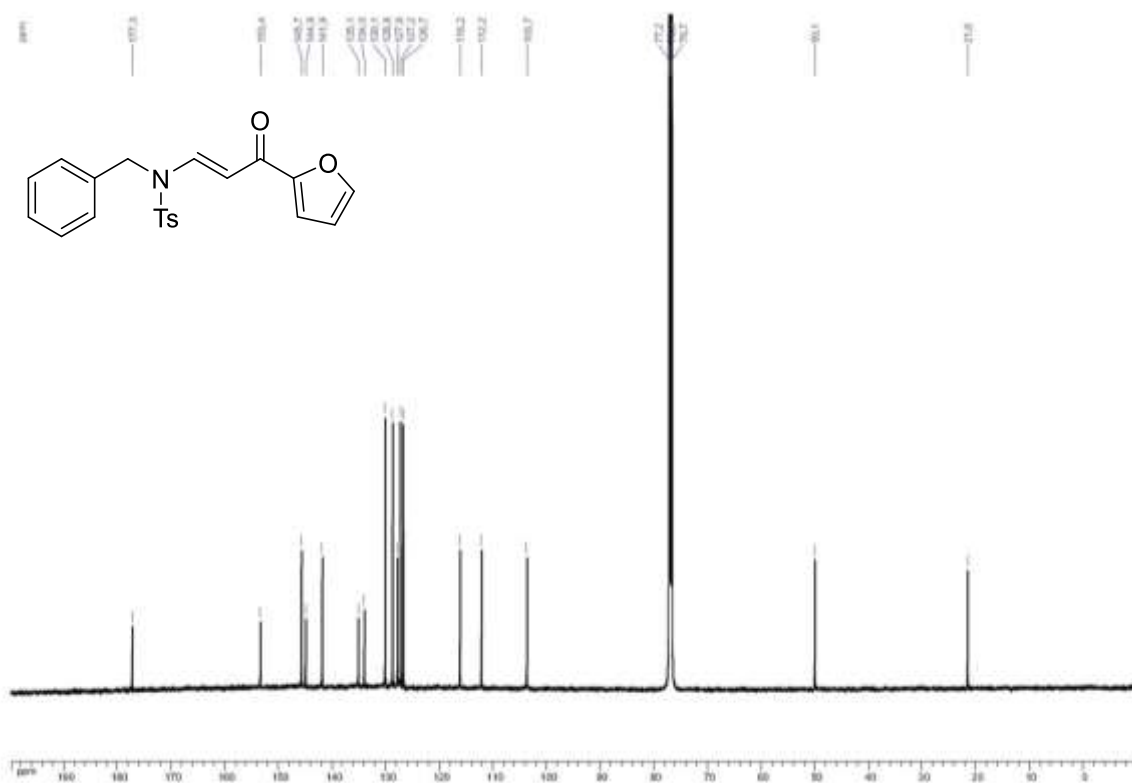

<sup>13</sup>C NMR (CDCl<sub>3</sub>, 125 MHz) of **25**

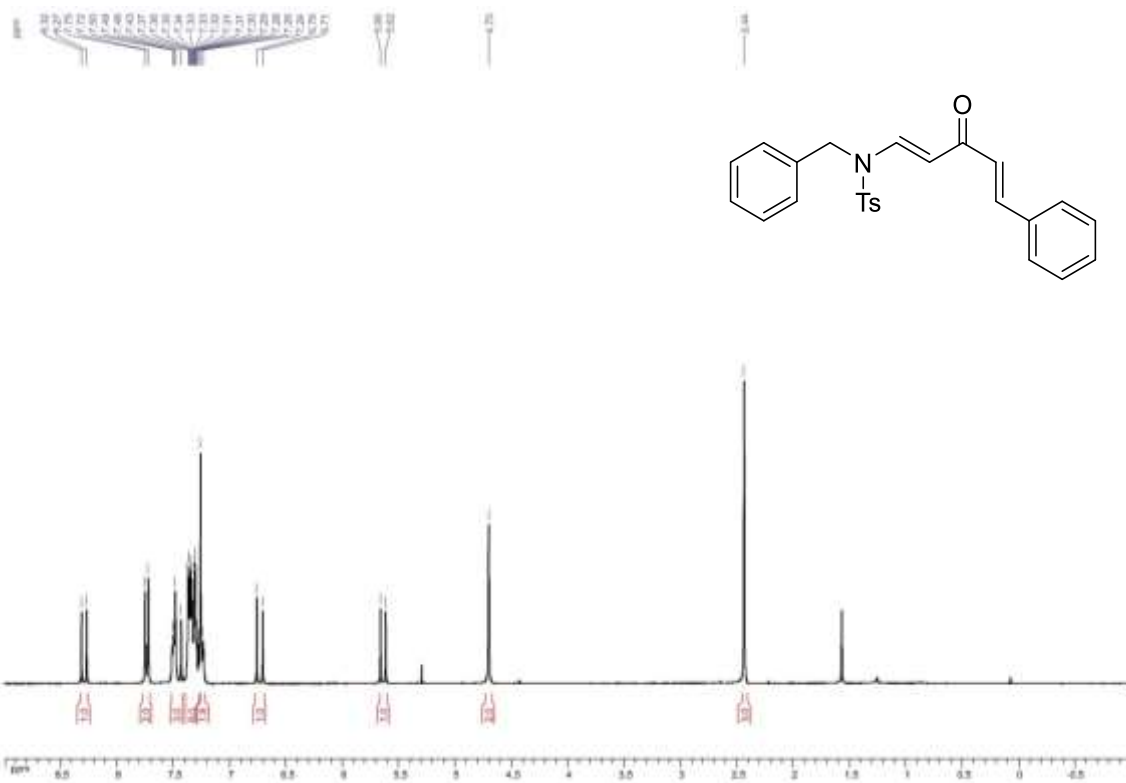

<sup>1</sup>H NMR (CDCl<sub>3</sub>, 500 MHz) of 26

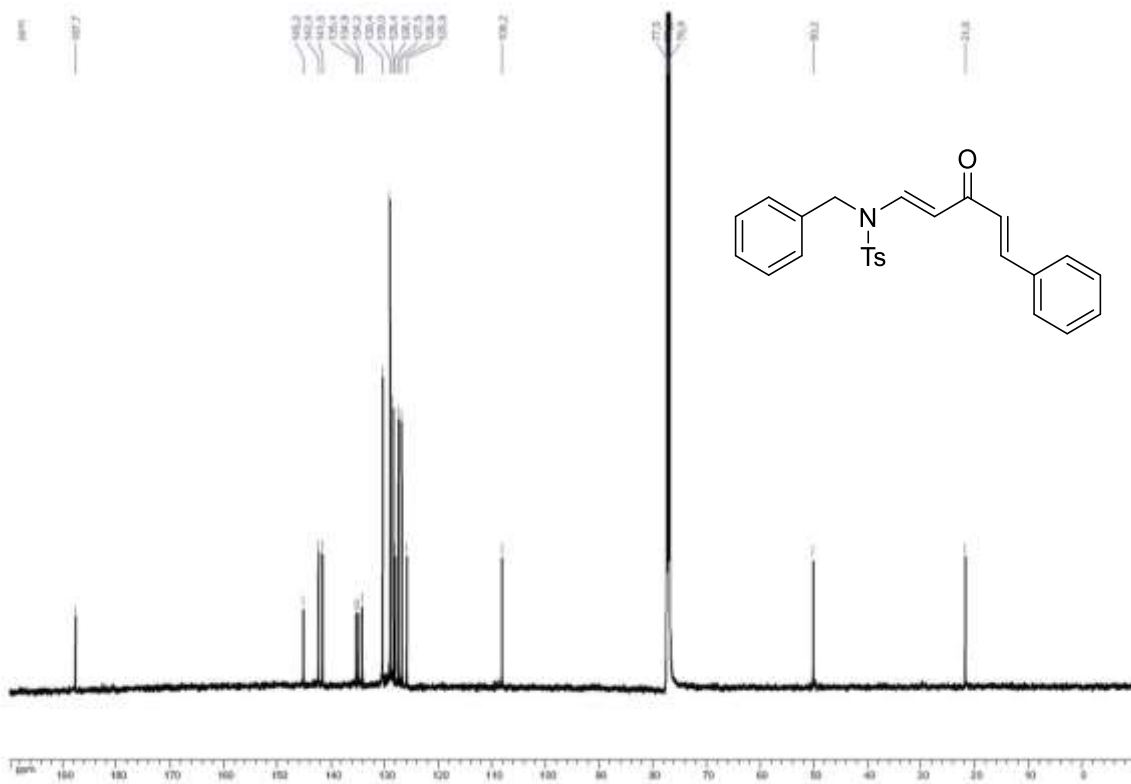

<sup>13</sup>C NMR (CDCl<sub>3</sub>, 125 MHz) of 26

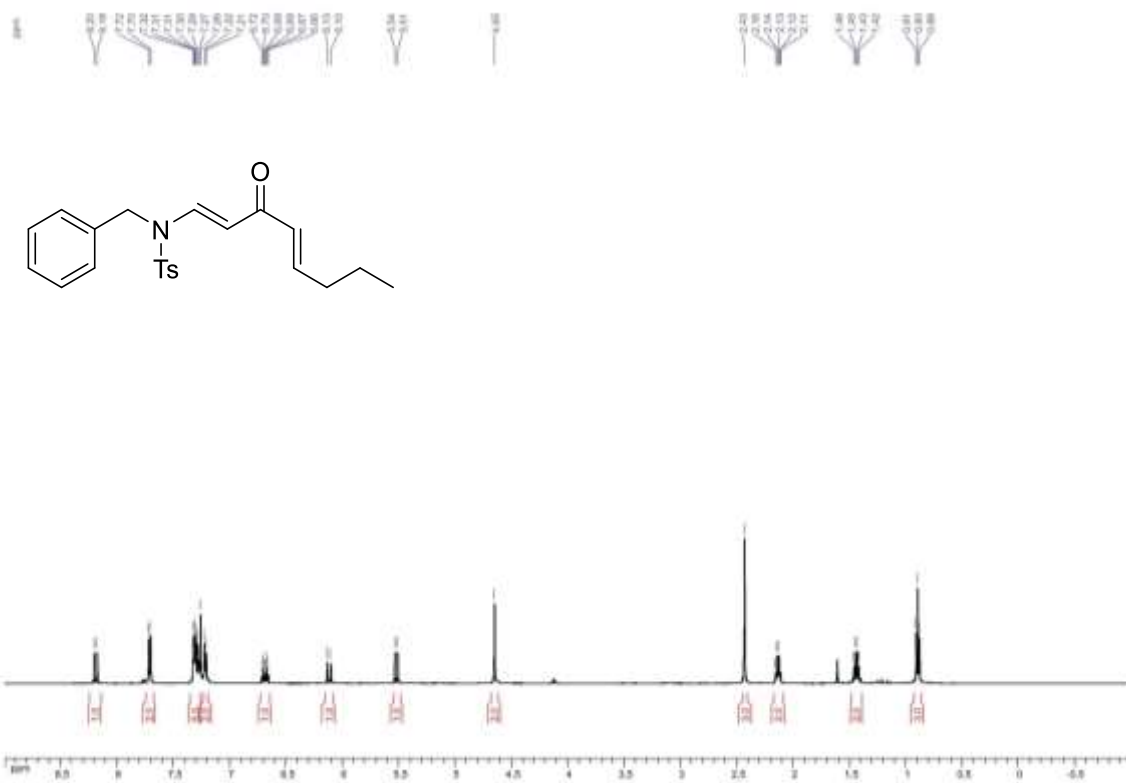

<sup>1</sup>H NMR (CDCl<sub>3</sub>, 500 MHz) of 27

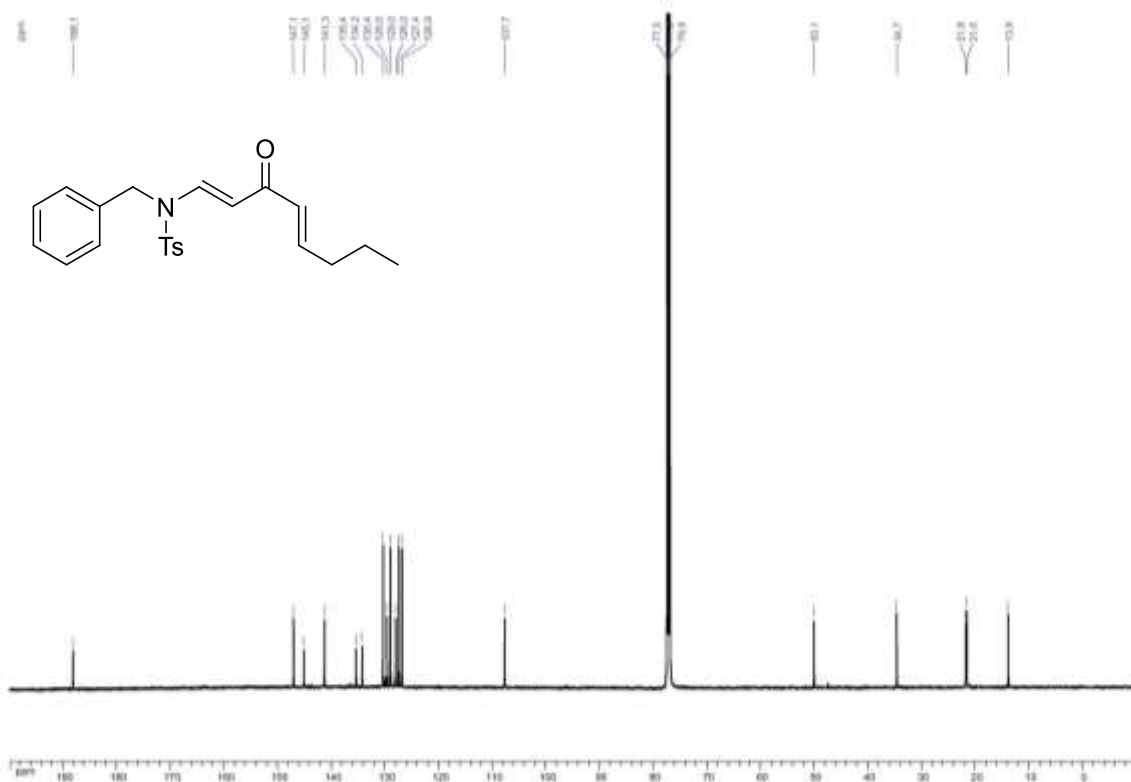

<sup>13</sup>C NMR (CDCl<sub>3</sub>, 125 MHz) of 27

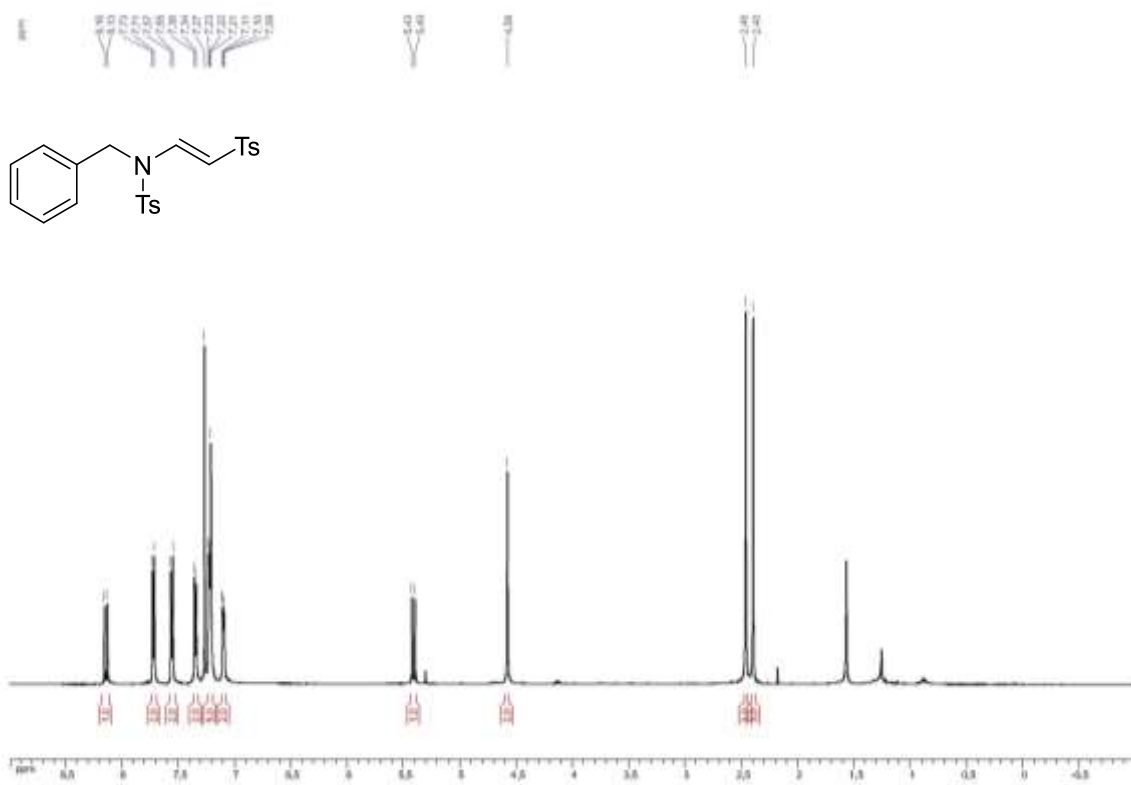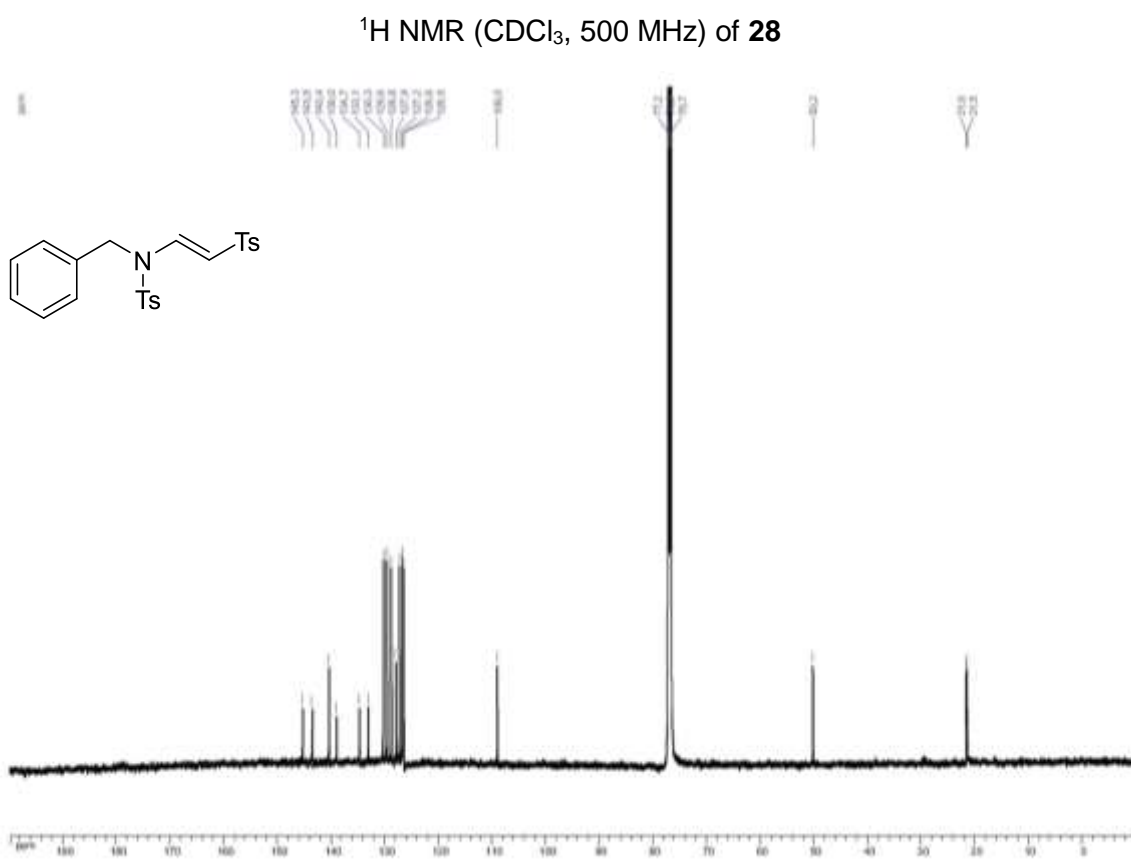

$^{13}\text{C NMR}$  ( $\text{CDCl}_3$ , 125 MHz) of **28**

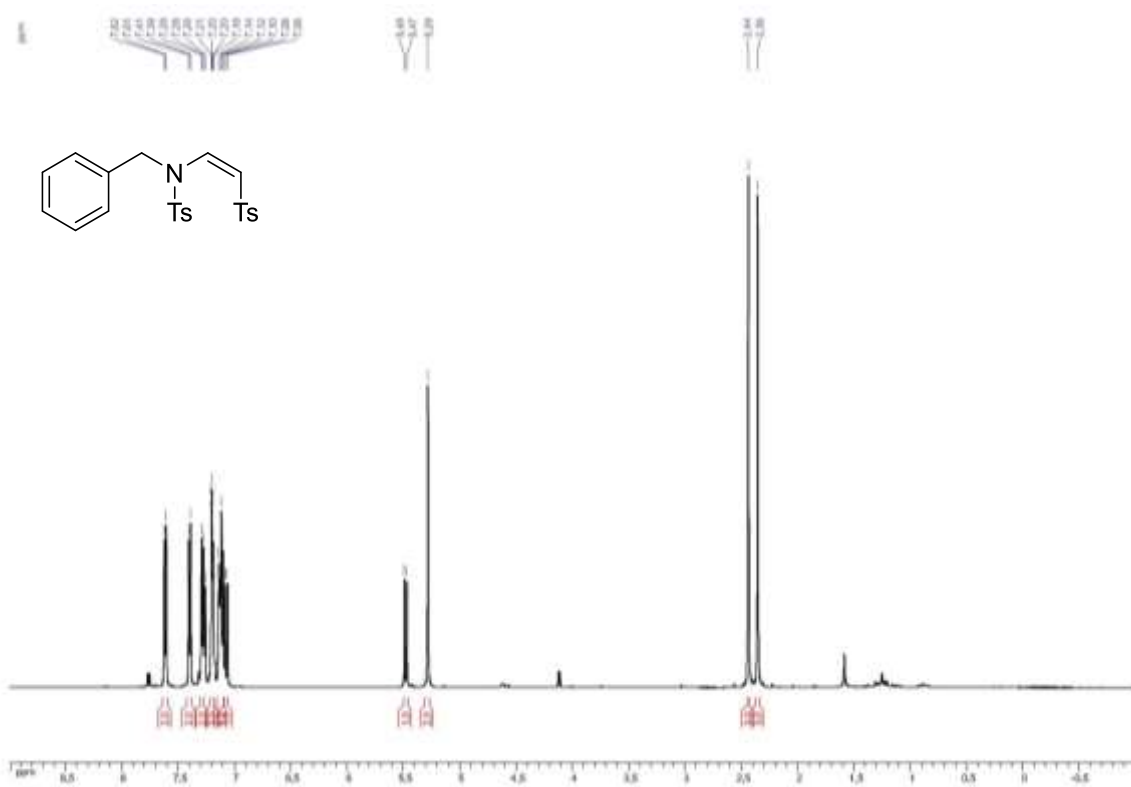

<sup>1</sup>H NMR (CDCl<sub>3</sub>, 500 MHz) of **28'**

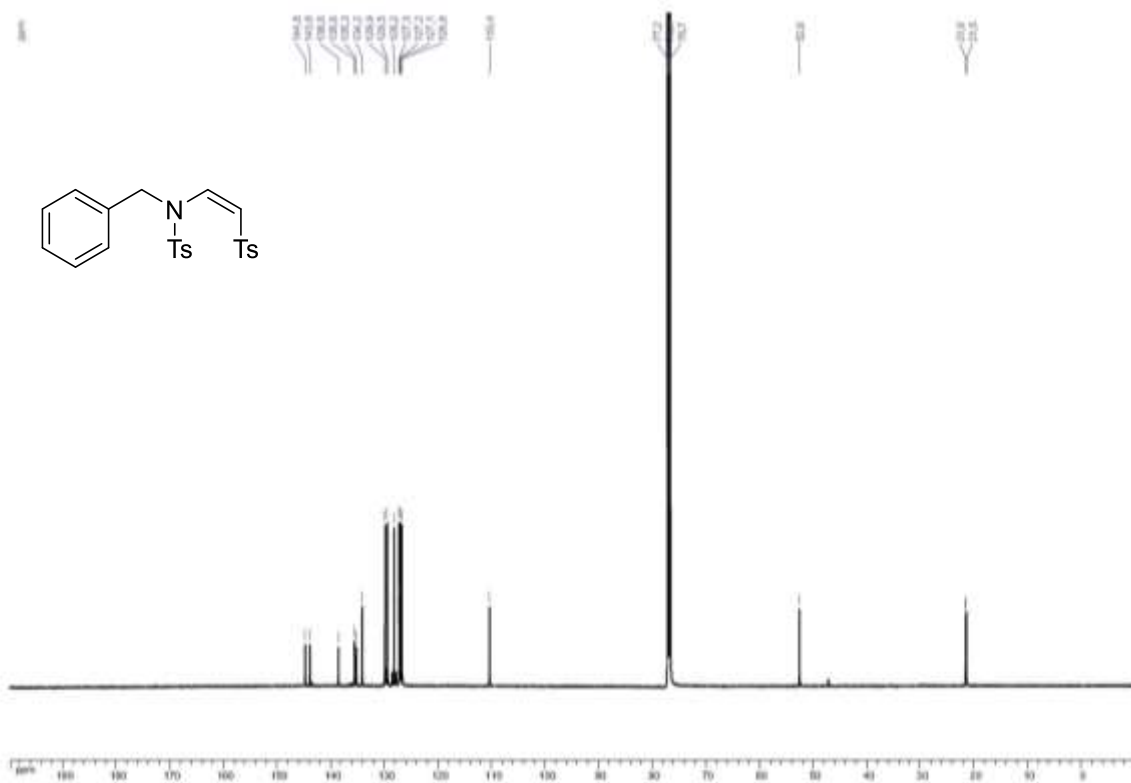

<sup>13</sup>C NMR (CDCl<sub>3</sub>, 125 MHz) of **28'**

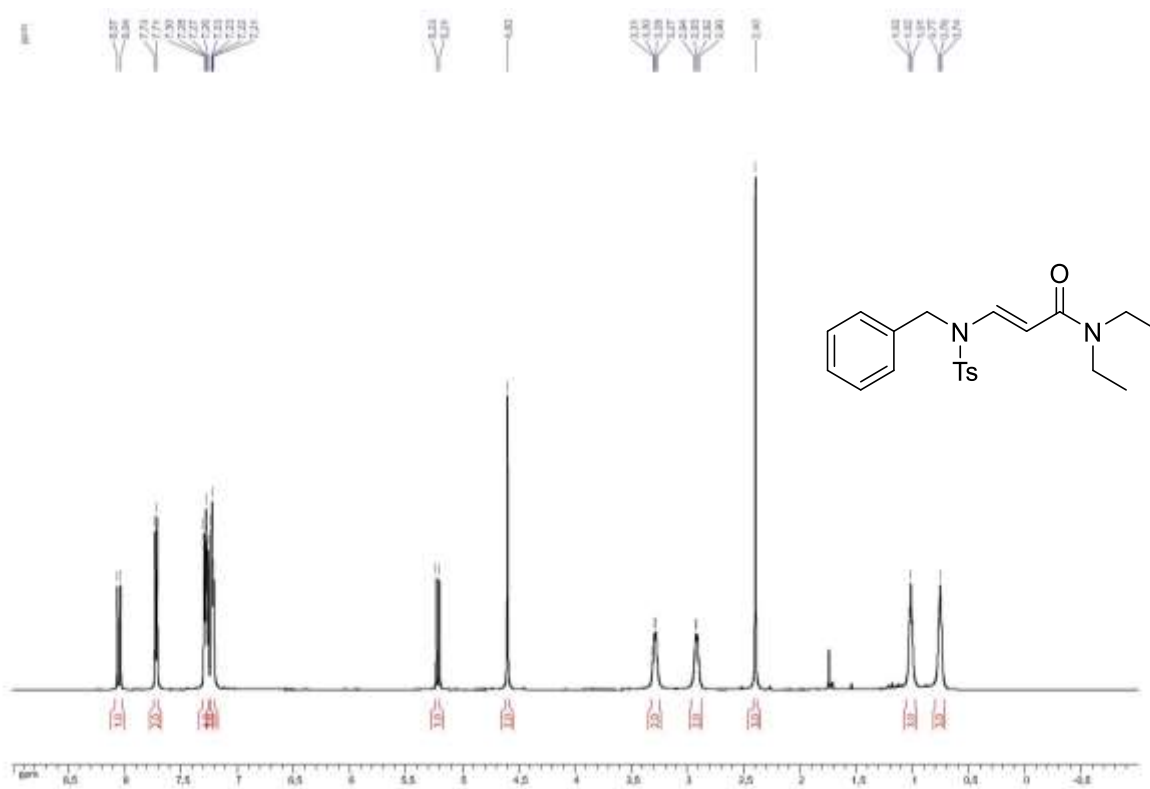

<sup>1</sup>H NMR (CDCl<sub>3</sub>, 500 MHz) of **29**

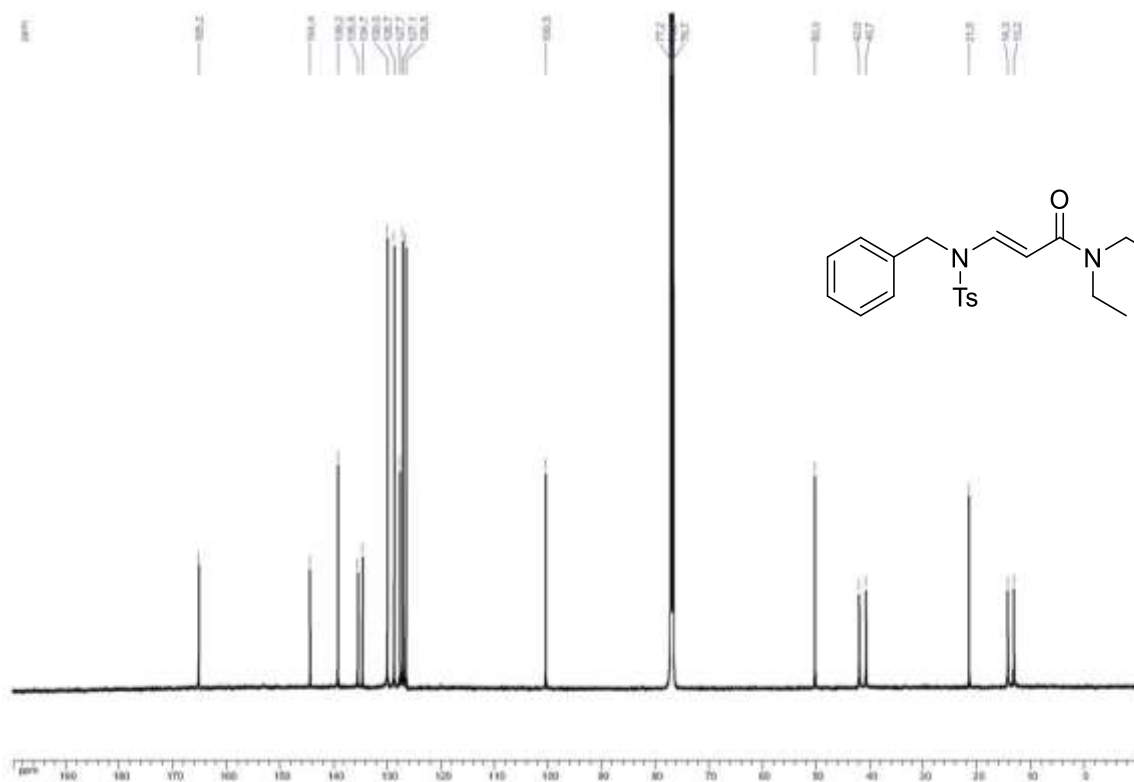

<sup>13</sup>C NMR (CDCl<sub>3</sub>, 125 MHz) of **29**



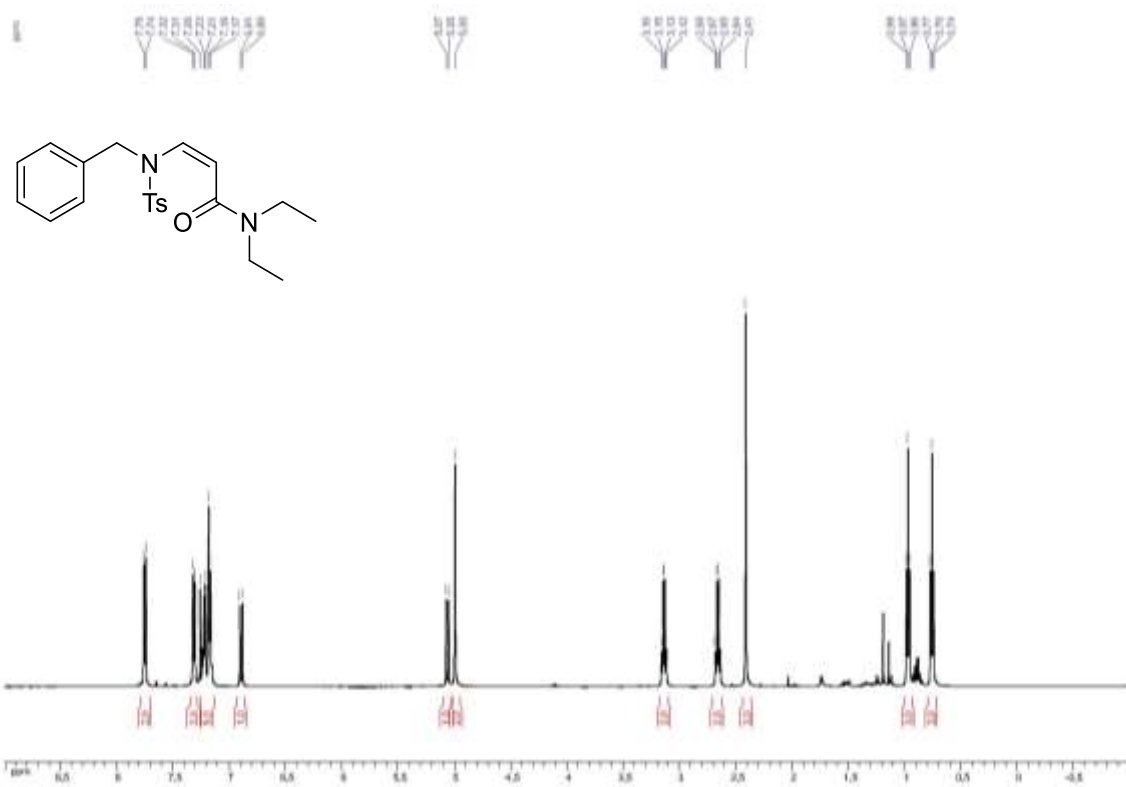

<sup>1</sup>H NMR (CDCl<sub>3</sub>, 500 MHz) of **29'**

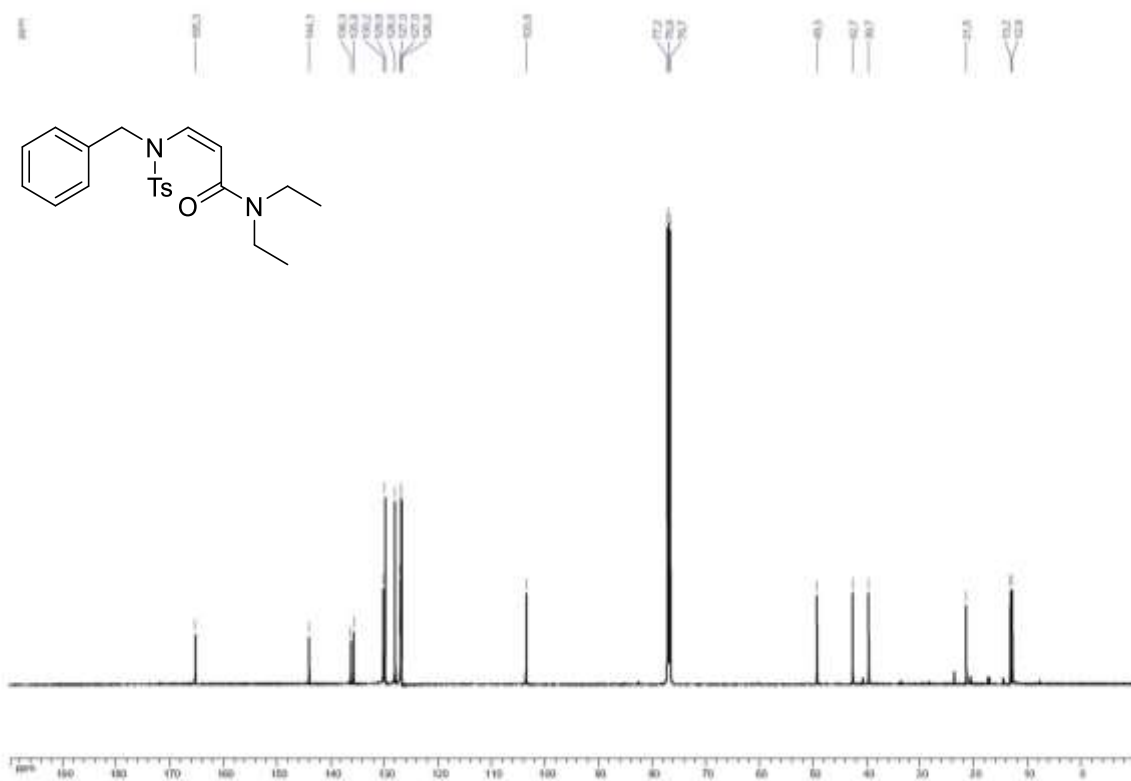

<sup>13</sup>C NMR (CDCl<sub>3</sub>, 125 MHz) of **29'**
